# Supplementary material for: Synthesis and cytotoxicity studies of Cu(i) and Ag(i) complexes based on sterically hindered β-diketonates with different degrees of fluorination
Source: Royal Society of Chemistry journal article supplement (doi:10.1039/d3dt02179c), 2023-01-01
Supplement: d3dt02179c1.pdf [file d3dt02179c1.pdf]

## Supporting Information

### Synthesis and cytotoxicity studies of Cu(I) and Ag(I) complexes based on sterically hindered $\beta$ -diketonates with different degrees of fluorination

Maura Pellei,<sup>a</sup> Jo' Del Gobbo,<sup>a</sup> Miriam Caviglia,<sup>a</sup> Deepika V. Karade,<sup>b</sup> Valentina Gandin,<sup>c</sup> Cristina Marzano,<sup>c</sup> Anurag Noonikara Poyil,<sup>b</sup> H. V. Rasika Dias,<sup>b</sup> Carlo Santini<sup>a</sup>

<sup>a</sup>*School of Science and Technology, Chemistry Division, University of Camerino, Via Madonna delle Carceri (ChIP), 62032 Camerino, Macerata, Italy*

<sup>b</sup>*Department of Chemistry and Biochemistry, The University of Texas at Arlington, Box 19065, Arlington, Texas 76019-0065, United States*

<sup>c</sup>*Department of Pharmaceutical and Pharmacological Sciences, University of Padova, via Marzolo 5, 35131 Padova, Italy*

#### Table of Contents:

**Figure S1.** Molecular structure of  $\text{HL}^{\text{CF}_3}$ .

**Figure S2.** Molecular structure of  $[\text{Cu}(\text{L}^{\text{Mes}})(\text{PPh}_3)_2]$  (**6**).

**Figure S3.** Stability studies. All complexes were dissolved at 50  $\mu\text{M}$  in 0.5% DMSO/physiological solution. UV-Visible spectra were recorded at  $t = 0$  min,  $t = 24$  h,  $t = 48$  h and  $t = 72$  h.

**Figure S4.** FT-IR spectrum of  $\text{NaL}^{\text{CF}_3}$  (**1**).

**Figure S5.**  $^1\text{H}$ -NMR spectrum of  $\text{NaL}^{\text{CF}_3}$  (**1**) in  $\text{DMSO-d}_6$ .

**Figure S6.**  $^{13}\text{C}\{^1\text{H}\}$ -NMR spectrum of  $\text{NaL}^{\text{CF}_3}$  (**1**) in  $\text{DMSO-d}_6$ .

**Figure S7.**  $^{19}\text{F}\{^1\text{H}\}$ -NMR spectrum of  $\text{NaL}^{\text{CF}_3}$  (**1**) in  $\text{DMSO-d}_6$ .

**Figure S8.** FT-IR spectrum of  $\text{NaL}^{\text{Mes}}$  (**2**).

**Figure S9.**  $^1\text{H}$ -NMR spectrum of  $\text{NaL}^{\text{Mes}}$  (**2**) in  $\text{CDCl}_3$ .

**Figure S10.**  $^{13}\text{C}\{^1\text{H}\}$ -NMR of  $\text{NaL}^{\text{Mes}}$  (**2**) in  $\text{CDCl}_3$ .

**Figure S11.** FT-IR spectrum of  $\text{NaL}^{\text{Ph}}$  (**3**).

**Figure S12.**  $^1\text{H}$ -NMR of  $\text{NaL}^{\text{Ph}}$  (**3**) in  $\text{CD}_3\text{OD}$ .

**Figure S13.**  $^1\text{H}$ -NMR of  $\text{NaL}^{\text{Ph}}$  (**3**) in  $\text{Acetone-d}_6$ .

**Figure S14.**  $^{13}\text{C}\{^1\text{H}\}$ -NMR of  $\text{NaL}^{\text{Ph}}$  (**3**) in  $\text{Acetone-d}_6$ .

**Figure S15.** FT-IR spectrum of  $[\text{Cu}(\text{L}^{\text{CF}_3})(\text{PPh}_3)_2]$  (**4**).

**Figure S16.**  $^1\text{H}$ -NMR spectrum of  $[\text{Cu}(\text{L}^{\text{CF}_3})(\text{PPh}_3)_2]$  (**4**) in  $\text{CDCl}_3$ .

**Figure S17.**  $^1\text{H}$ -NMR spectrum of  $[\text{Cu}(\text{L}^{\text{CF}_3})(\text{PPh}_3)_2]$  (**4**) in  $\text{DMSO-d}_6$ .

**Figure S18.**  $^{13}\text{C}\{^1\text{H}\}$ -NMR of  $[\text{Cu}(\text{L}^{\text{CF}_3})(\text{PPh}_3)_2]$  (**4**) in  $\text{CDCl}_3$ .

**Figure S19.**  $^{31}\text{P}\{^1\text{H}\}$ -NMR spectrum of  $[\text{Cu}(\text{L}^{\text{CF}_3})(\text{PPh}_3)_2]$  (**4**) in  $\text{CDCl}_3$  at 223 K.

**Figure S20.**  $^{19}\text{F}\{^1\text{H}\}$ -NMR spectrum of  $[\text{Cu}(\text{L}^{\text{CF}_3})(\text{PPh}_3)_2]$  (**4**) in  $\text{CDCl}_3$ .

**Figure S21.** FT-IR spectrum of  $[\text{Ag}(\text{L}^{\text{CF}_3})(\text{PPh}_3)_2]$  (**5**).

**Figure S22.**  $^1\text{H}$ -NMR spectrum of  $[\text{Ag}(\text{L}^{\text{CF}_3})(\text{PPh}_3)_2]$  (**5**) in  $\text{CDCl}_3$ .

**Figure S23.**  $^1\text{H}$ -NMR spectrum of  $[\text{Ag}(\text{L}^{\text{CF}_3})(\text{PPh}_3)_2]$  (**5**) in  $\text{DMSO-d}_6$ .

**Figure S24.**  $^{13}\text{C}\{^1\text{H}\}$ -NMR of  $[\text{Ag}(\text{L}^{\text{CF}_3})(\text{PPh}_3)_2]$  (**5**) in  $\text{CDCl}_3$ .

**Figure S25.**  $^{31}\text{P}\{^1\text{H}\}$ -NMR spectrum of  $[\text{Ag}(\text{L}^{\text{CF}_3})(\text{PPh}_3)_2]$  (**5**) in  $\text{CDCl}_3$ .

**Figure S26.**  $^{31}\text{P}\{^1\text{H}\}$ -NMR spectrum of  $[\text{Ag}(\text{L}^{\text{CF}_3})(\text{PPh}_3)_2]$  (**5**) in  $\text{CDCl}_3$  at 223 K.

**Figure S27.**  $^{19}\text{F}\{^1\text{H}\}$ -NMR spectrum of  $[\text{Ag}(\text{L}^{\text{CF}_3})(\text{PPh}_3)_2]$  (**5**) in  $\text{CDCl}_3$ .

**Figure S28.** FT-IR spectrum of  $[\text{Cu}(\text{L}^{\text{Mes}})(\text{PPh}_3)_2]$  (**6**).

**Figure S29.**  $^1\text{H}$ -NMR spectrum of  $[\text{Cu}(\text{L}^{\text{Mes}})(\text{PPh}_3)_2]$  (**6**) in  $\text{CDCl}_3$ .

**Figure S30.**  $^1\text{H}$ -NMR spectrum of  $[\text{Cu}(\text{L}^{\text{Mes}})(\text{PPh}_3)_2]$  (**6**) in  $\text{DMSO-d}_6$ .

**Figure S31.**  $^{13}\text{C}\{^1\text{H}\}$ -NMR of  $[\text{Cu}(\text{L}^{\text{Mes}})(\text{PPh}_3)_2]$  (**6**) in  $\text{CDCl}_3$ .

**Figure S32.**  $^{31}\text{P}\{^1\text{H}\}$ -NMR spectrum of  $[\text{Cu}(\text{L}^{\text{Mes}})(\text{PPh}_3)_2]$  (**6**) in  $\text{CD}_2\text{Cl}_2$ .

**Figure S33.** FT-IR spectrum of  $[\text{Ag}(\text{L}^{\text{Mes}})(\text{PPh}_3)_2]$  (**7**).

**Figure S34.**  $^1\text{H}$ -NMR spectrum of  $[\text{Ag}(\text{L}^{\text{Mes}})(\text{PPh}_3)_2]$  (**7**) in  $\text{CDCl}_3$ .

**Figure S35.**  $^1\text{H}$ -NMR spectrum of  $[\text{Ag}(\text{L}^{\text{Mes}})(\text{PPh}_3)_2]$  (**7**) in  $\text{DMSO-d}_6$ .

**Figure S36.**  $^{13}\text{C}\{^1\text{H}\}$ -NMR of  $[\text{Ag}(\text{L}^{\text{Mes}})(\text{PPh}_3)_2]$  (**7**) in  $\text{CDCl}_3$ .

**Figure S37.**  $^{31}\text{P}\{^1\text{H}\}$ -NMR spectrum of  $[\text{Ag}(\text{L}^{\text{Mes}})(\text{PPh}_3)_2]$  (**7**) in  $\text{CDCl}_3$ .

**Figure S38.**  $^{31}\text{P}\{^1\text{H}\}$ -NMR spectrum of  $[\text{Ag}(\text{L}^{\text{Mes}})(\text{PPh}_3)_2]$  (**7**) in  $\text{CDCl}_3$  at 223K.

**Figure S39.** FT-IR spectrum of  $[\text{Ag}(\text{L}^{\text{Mes}})(\text{PTA})]$  (**8**).

**Figure S40.**  $^1\text{H}$ -NMR spectrum of  $[\text{Ag}(\text{L}^{\text{Mes}})(\text{PTA})]$  (**8**) in  $\text{CD}_3\text{OD}$ .

**Figure S41.**  $^1\text{H}$ -NMR spectrum of  $[\text{Ag}(\text{L}^{\text{Mes}})(\text{PTA})]$  (**8**) in  $\text{DMSO-d}_6$ .

**Figure S42.**  $^{13}\text{C}\{^1\text{H}\}$ -NMR of  $[\text{Ag}(\text{L}^{\text{Mes}})(\text{PTA})]$  (**8**) in  $\text{DMSO-d}_6$ .

**Figure S43.**  $^{31}\text{P}\{^1\text{H}\}$ -NMR spectrum of  $[\text{Ag}(\text{L}^{\text{Mes}})(\text{PTA})]$  (**8**) in  $\text{CD}_3\text{OD}$ .

**Figure S44.**  $^{31}\text{P}\{^1\text{H}\}$ -NMR spectrum of  $[\text{Ag}(\text{L}^{\text{Mes}})(\text{PTA})]$  (**8**) in  $\text{D}_2\text{O}$ .

**Figure S45.**  $^{31}\text{P}\{^1\text{H}\}$ -NMR spectrum of  $[\text{Ag}(\text{L}^{\text{Mes}})(\text{PTA})]$  (**8**) in  $\text{CD}_3\text{OD}$  at 223 K.

**Figure S46.** FT-IR spectrum of  $[\text{Cu}(\text{L}^{\text{Ph}})(\text{PPh}_3)_2]$  (**9**).

**Figure S47.**  $^1\text{H}$ -NMR spectrum of  $[\text{Cu}(\text{L}^{\text{Ph}})(\text{PPh}_3)_2]$  (**9**) in  $\text{CDCl}_3$ .

**Figure S48.**  $^1\text{H}$ -NMR spectrum of  $[\text{Cu}(\text{L}^{\text{Ph}})(\text{PPh}_3)_2]$  (**9**) in  $\text{DMSO-d}_6$ .

**Figure S49.**  $^{13}\text{C}\{^1\text{H}\}$ -NMR spectrum of  $[\text{Cu}(\text{L}^{\text{Ph}})(\text{PPh}_3)_2]$  (**9**) in  $\text{CDCl}_3$ .

**Figure S50.**  $^{31}\text{P}\{^1\text{H}\}$ -NMR spectrum of  $[\text{Cu}(\text{L}^{\text{Ph}})(\text{PPh}_3)_2]$  (**9**) in  $\text{CDCl}_3$ .

**Figure S51.** FT-IR spectrum of  $\text{Ag}(\text{L}^{\text{Ph}})(\text{PPh}_3)_2$  (**10**).

**Figure S52.**  $^1\text{H}$ -NMR spectrum of  $\text{Ag}(\text{L}^{\text{Ph}})(\text{PPh}_3)_2$  (**10**) in  $\text{CDCl}_3$ .

**Figure S53.**  $^1\text{H}$ -NMR spectrum of  $\text{Ag}(\text{L}^{\text{Ph}})(\text{PPh}_3)_2$  (**10**) in  $\text{DMSO-d}_6$ .

**Figure S54.**  $^{13}\text{C}\{^1\text{H}\}$ -NMR spectrum of  $[\text{Ag}(\text{L}^{\text{Ph}})(\text{PPh}_3)_2]$  (**10**) in  $\text{CDCl}_3$ .

**Figure S55.**  $^{31}\text{P}\{^1\text{H}\}$ -NMR spectrum of  $[\text{Ag}(\text{L}^{\text{Ph}})(\text{PPh}_3)_2]$  (**10**) in  $\text{CDCl}_3$ .

**Figure S56.**  $^{31}\text{P}\{^1\text{H}\}$ -NMR spectrum of  $[\text{Ag}(\text{L}^{\text{Ph}})(\text{PPh}_3)_2]$  (**10**) in  $\text{CDCl}_3$  at 223K.

**Figure S57.** FT-IR spectrum of  $[\text{Ag}(\text{L}^{\text{Ph}})(\text{PTA})]\cdot\text{H}_2\text{O}$  (**11**).

**Figure S58.**  $^1\text{H}$ -NMR spectrum of  $[\text{Ag}(\text{L}^{\text{Ph}})(\text{PTA})]\cdot\text{H}_2\text{O}$  (**11**) in  $\text{CD}_3\text{OD}$ .

**Figure S59.**  $^1\text{H}$ -NMR spectrum of  $[\text{Ag}(\text{L}^{\text{Ph}})(\text{PTA})]\cdot\text{H}_2\text{O}$  (**11**) in  $\text{D}_2\text{O}$ .

**Figure S60.**  $^1\text{H}$ -NMR spectrum of  $[\text{Ag}(\text{L}^{\text{Ph}})(\text{PTA})]\cdot\text{H}_2\text{O}$  (**11**) in  $\text{DMSO-d}_6$ .

**Figure S61.**  $^{13}\text{C}\{^1\text{H}\}$ -NMR spectrum of  $[\text{Ag}(\text{L}^{\text{Ph}})(\text{PTA})]\cdot\text{H}_2\text{O}$  (**11**) in  $\text{CD}_3\text{OD}$ .

**Figure S62.**  $^{31}\text{P}\{^1\text{H}\}$ -NMR spectrum of  $[\text{Ag}(\text{L}^{\text{Ph}})(\text{PTA})]\cdot\text{H}_2\text{O}$  (**11**) in  $\text{CD}_3\text{OD}$ .

**Figure S63.**  $^{31}\text{P}\{^1\text{H}\}$ -NMR spectrum of  $[\text{Ag}(\text{L}^{\text{Ph}})(\text{PTA})]\cdot\text{H}_2\text{O}$  (**11**) in  $\text{CD}_3\text{OD}$  at 223 K.

**Table S1.** Crystal data and structure refinement for  $\text{HL}^{\text{CF}_3}$ .

**Table S2.** Bond Lengths for  $\text{HL}^{\text{CF}_3}$ .

**Table S3.** Bond Angles for  $\text{HL}^{\text{CF}_3}$ .

**Table S4.** Crystal data and structure refinement for  $[\text{Cu}(\text{L}^{\text{CF}_3})(\text{PPh}_3)_2]$  (**4**).

**Table S5.** Bond Lengths for  $[\text{Cu}(\text{L}^{\text{CF}_3})(\text{PPh}_3)_2]$  (**4**).

**Table S6.** Bond Angles for  $[\text{Cu}(\text{L}^{\text{CF}_3})(\text{PPh}_3)_2]$  (**4**).

**Table S7.** Crystal data and structure refinement for  $[\text{Ag}(\text{L}^{\text{Ph}})(\text{PPh}_3)_2]$  (**10**).

**Table S8.** Bond Lengths for  $[\text{Ag}(\text{L}^{\text{Ph}})(\text{PPh}_3)_2]$  (**10**).

**Table S9.** Bond Angles for  $[\text{Ag}(\text{L}^{\text{Ph}})(\text{PPh}_3)_2]$  (**10**).

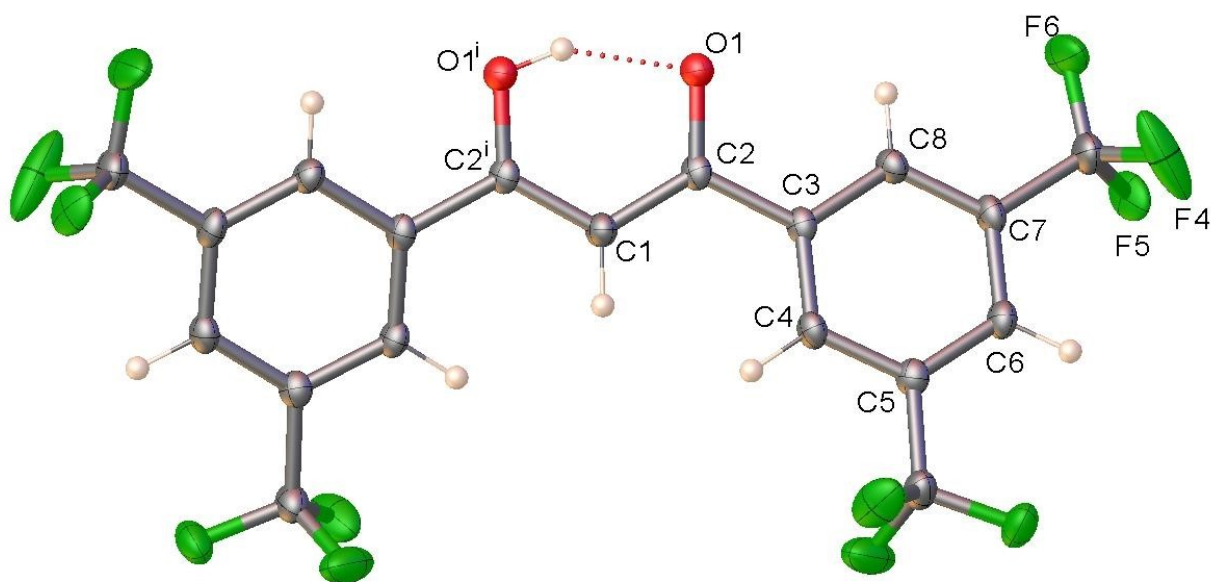

**Figure S1.** Molecular structure of HL<sup>CF3</sup>.

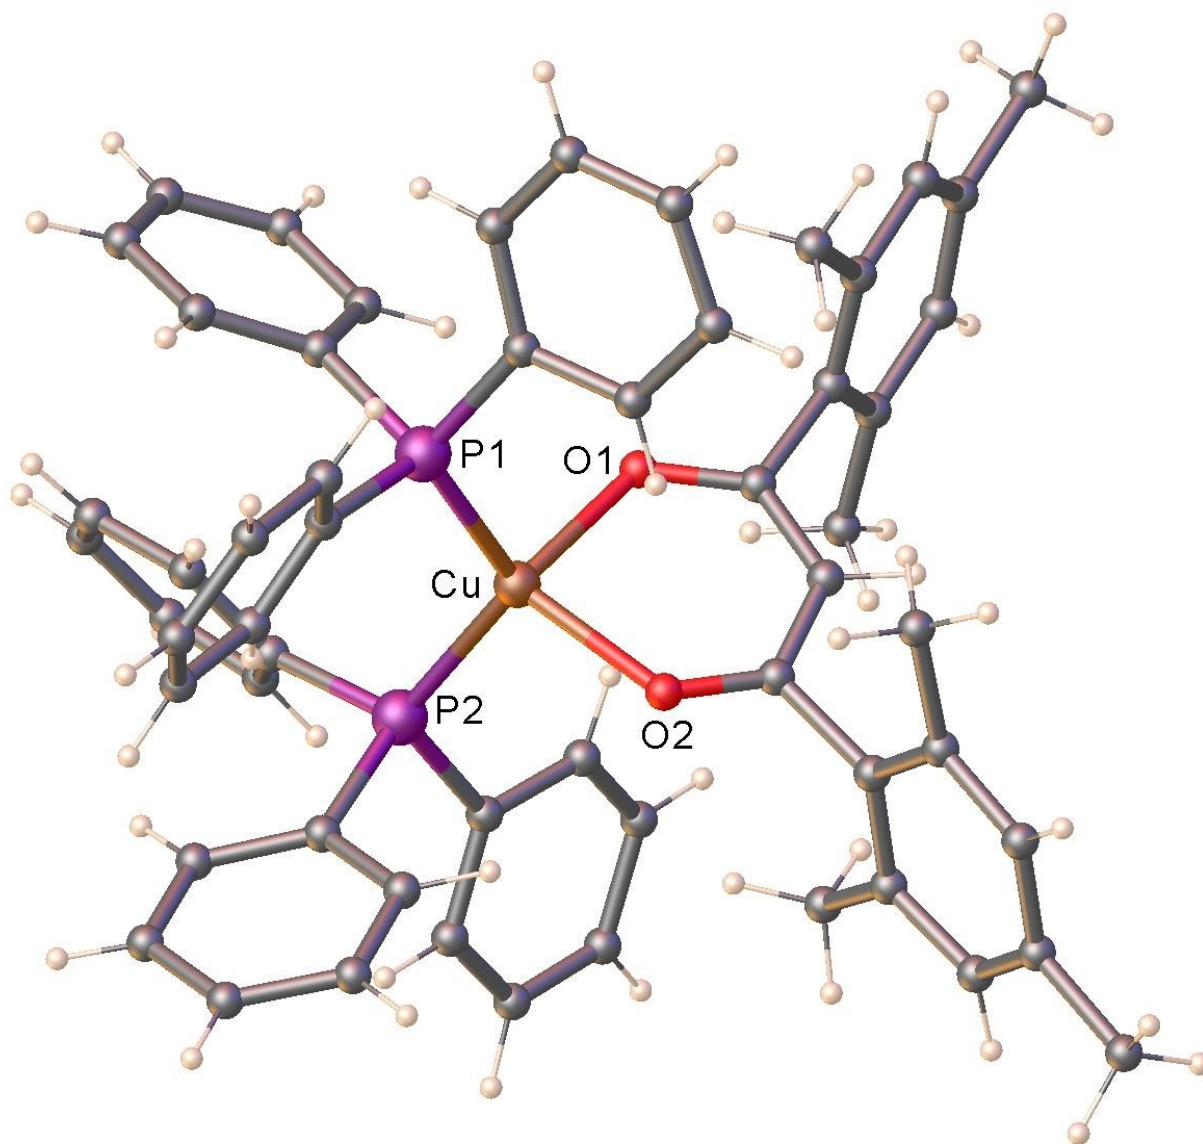

**Figure S2.** Molecular structure of  $[\text{Cu}(\text{L}^{\text{Mes}})(\text{PPh}_3)_2]$  (**6**). It crystallizes with a molecule of  $\text{CH}_2\text{Cl}_2$ . Crystal Data for  $\text{C}_{58}\text{H}_{55}\text{Cl}_2\text{CuO}_2\text{P}_2$  ( $M = 980.40$  g/mol): monoclinic, space group  $\text{P2}_1/\text{c}$  (no. 14),  $a = 23.368(14)$  Å,  $b = 15.832(9)$  Å,  $c = 13.601(8)$  Å,  $\beta = 98.943(10)^\circ$ ,  $V = 4971(5)$  Å<sup>3</sup>,  $Z = 4$ ,  $T = 99.96$  K,  $\mu(\text{Mo K}\alpha) = 0.654$  mm<sup>-1</sup>,  $D_{\text{calc}} = 1.310$  g/cm<sup>3</sup>, 10374 reflections measured ( $1.764^\circ \leq 2\theta \leq 55.282^\circ$ ), 10374 unique ( $R_{\text{int}} = \text{merged}$ ,  $R_{\text{sigma}} = 0.1200$ ) which were used in all calculations. The final  $R_1$  was 0.0887 ( $I > 2\sigma(I)$ ) and  $wR_2$  was 0.2455 (all data).

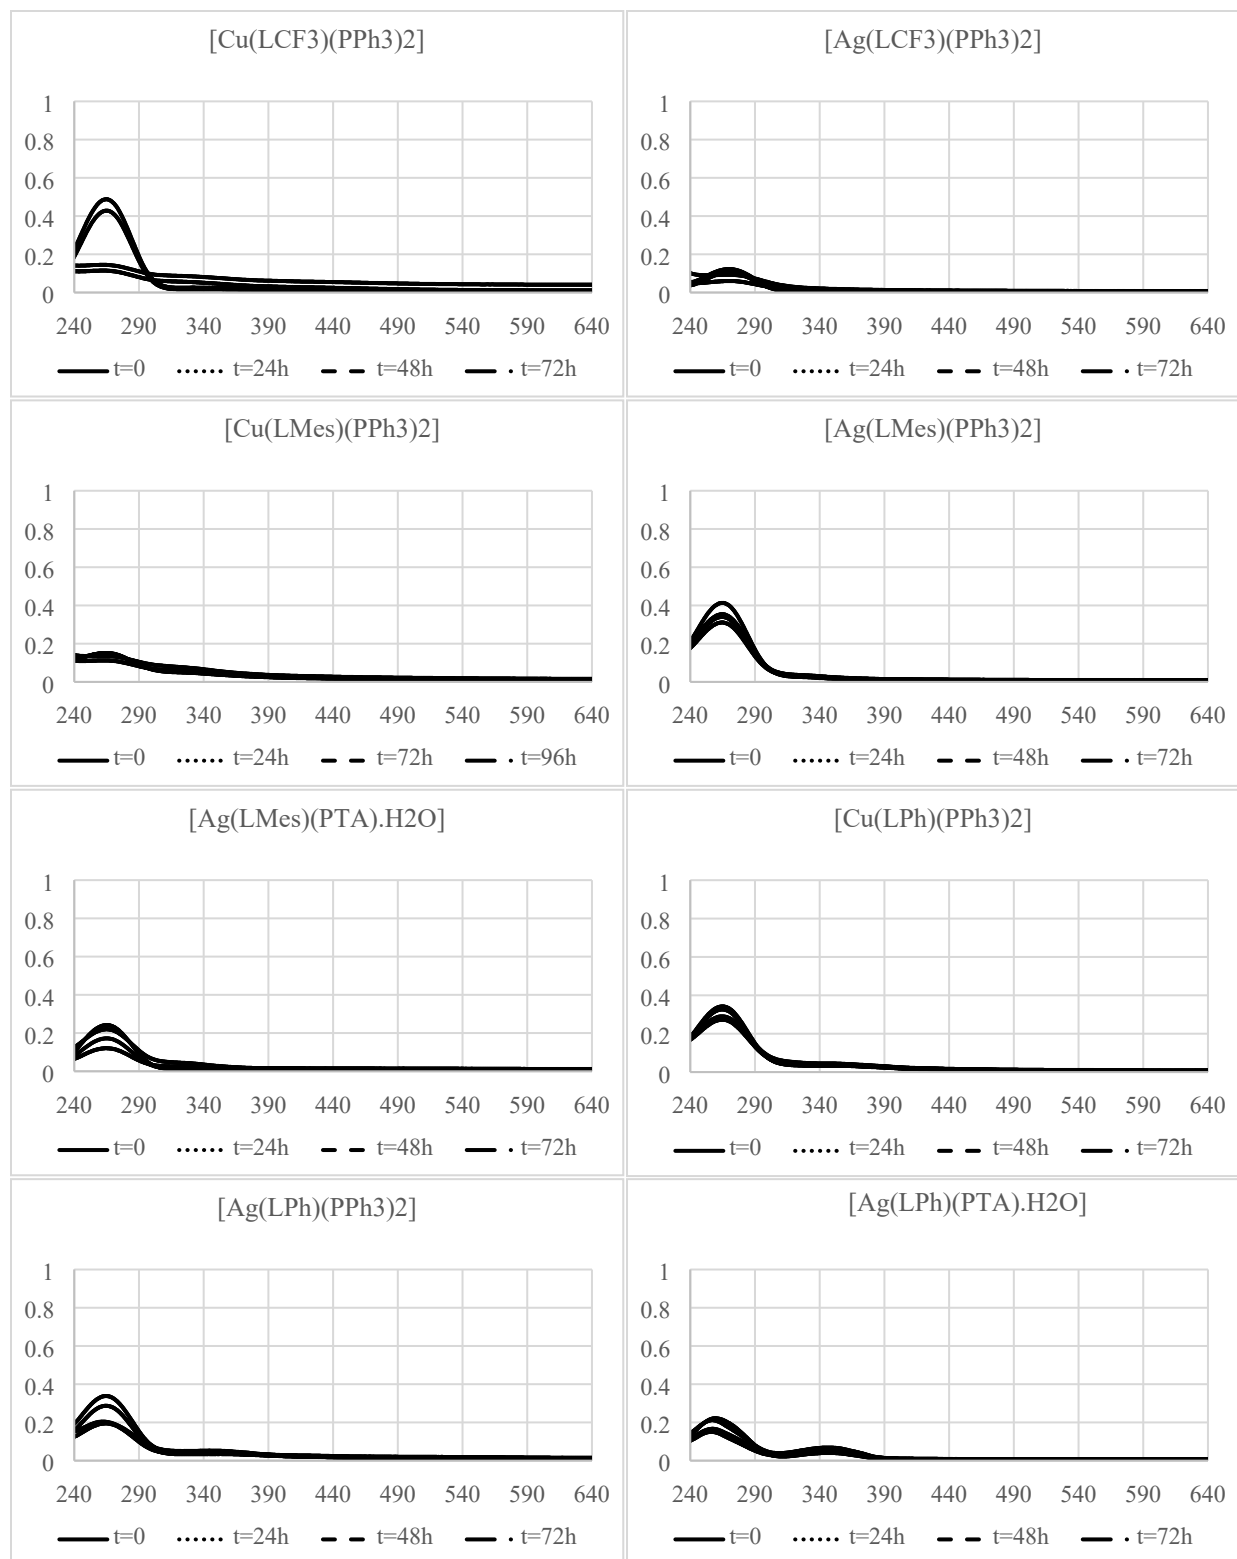

**Figure S3.** Stability studies. All complexes were dissolved at 50  $\mu$ M in 0.5% DMSO/physiological solution. UV-Visible spectra were recorded at t = 0 min, t = 24 h, t = 48 h and t = 72 h.

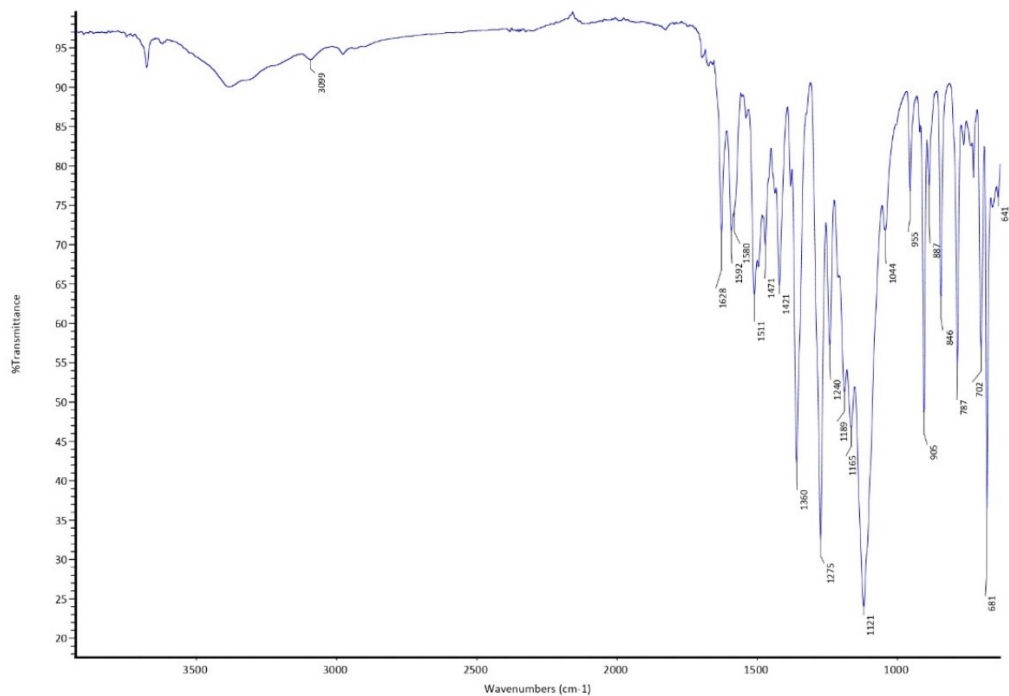

**Figure S4.** FT-IR spectrum of NaL<sup>CF3</sup> (1).

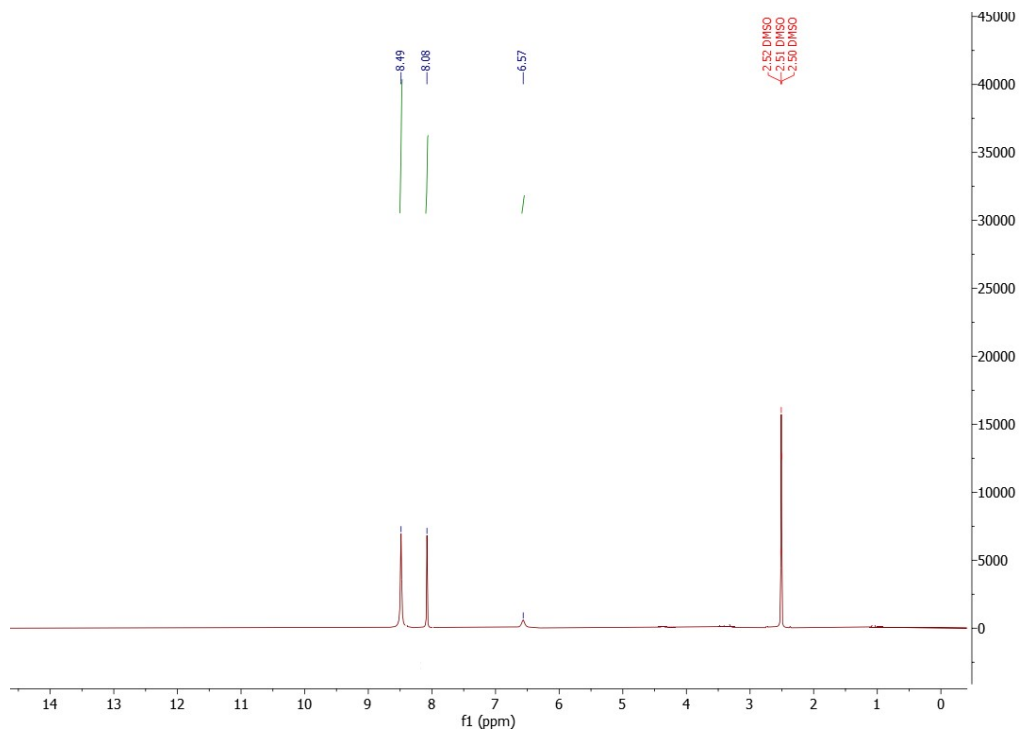

**Figure S5.** <sup>1</sup>H-NMR spectrum of NaL<sup>CF3</sup> (1) in DMSO-d<sub>6</sub>.

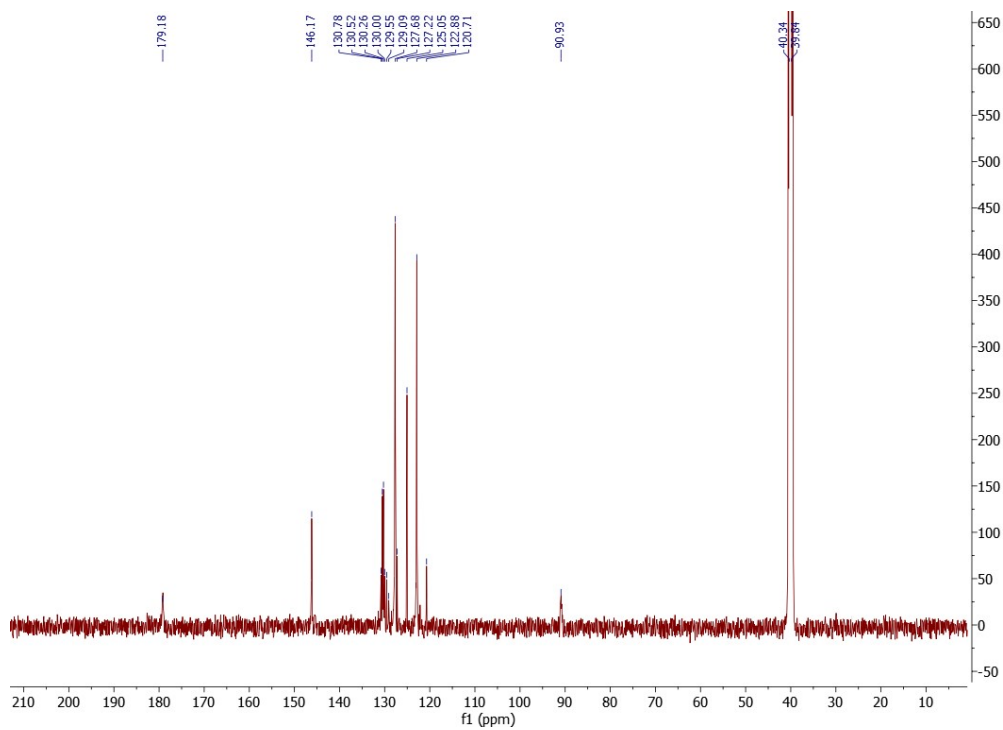

**Figure S6.**  $^{13}\text{C}\{^1\text{H}\}$ -NMR spectrum of  $\text{NaL}^{\text{CF}_3}$  (1) in  $\text{DMSO-d}_6$ .

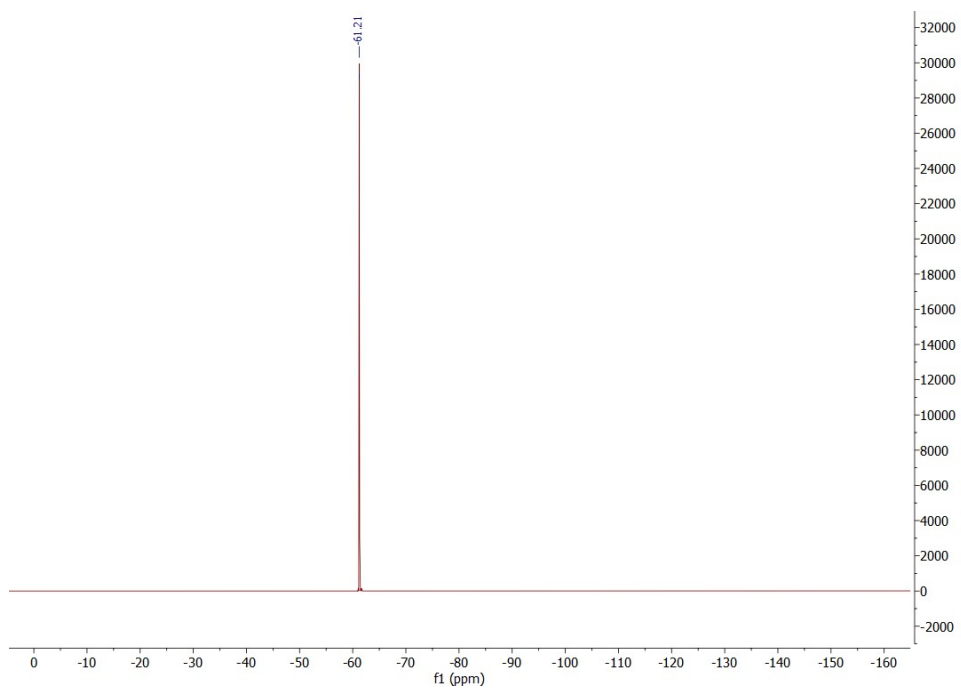

**Figure S7.**  $^{19}\text{F}\{^1\text{H}\}$ -NMR spectrum of  $\text{NaL}^{\text{CF}_3}$  (1) in  $\text{DMSO-d}_6$ .



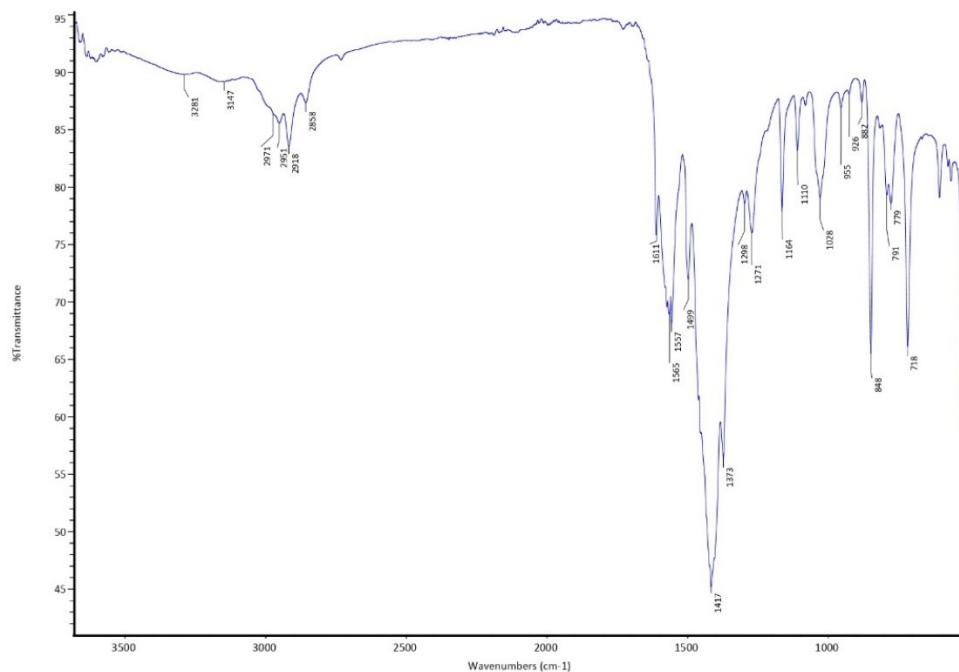

**Figure S8.** FT-IR spectrum of NaL<sup>Mes</sup> (**2**).

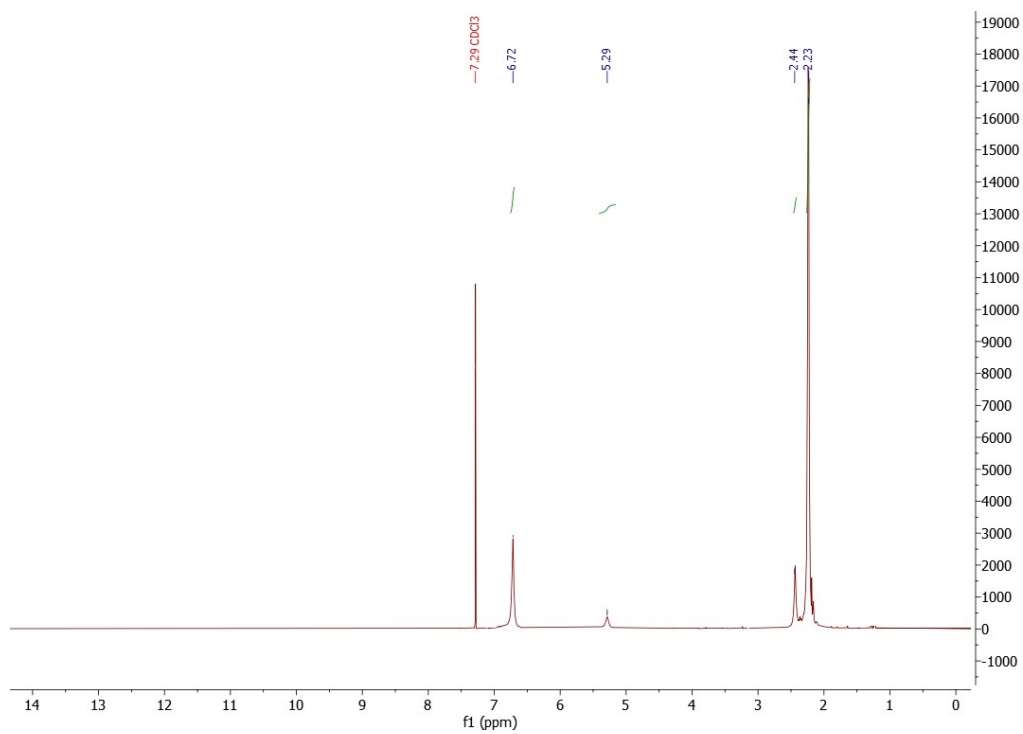

**Figure S9.** <sup>1</sup>H-NMR spectrum of NaL<sup>Mes</sup> (**2**) in CDCl<sub>3</sub>.

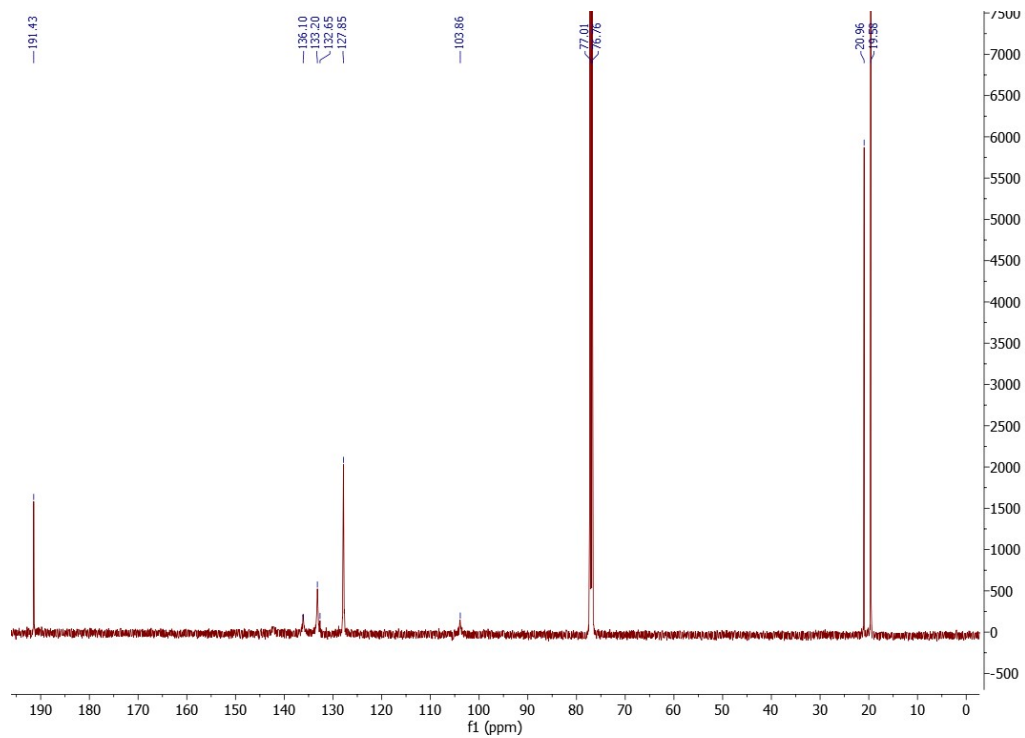

Figure S10.  $^{13}\text{C}\{^1\text{H}\}$ -NMR of  $\text{NaL}^{\text{Mes}}$  (2) in  $\text{CDCl}_3$ .

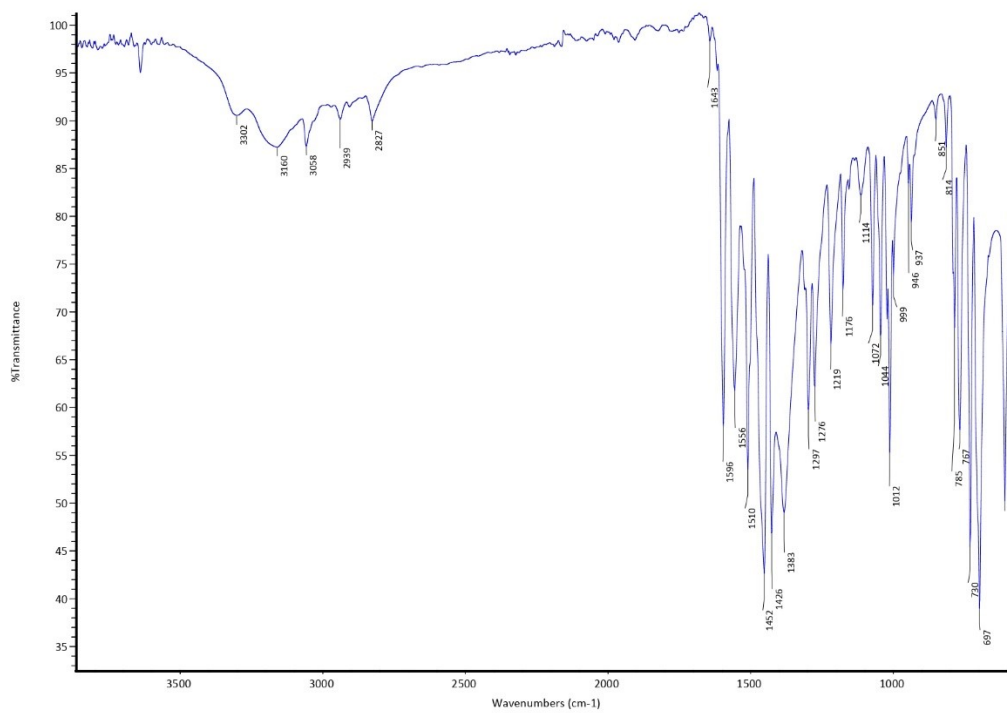

Figure S11. FT-IR spectrum of  $\text{NaL}^{\text{Ph}}$  (3).

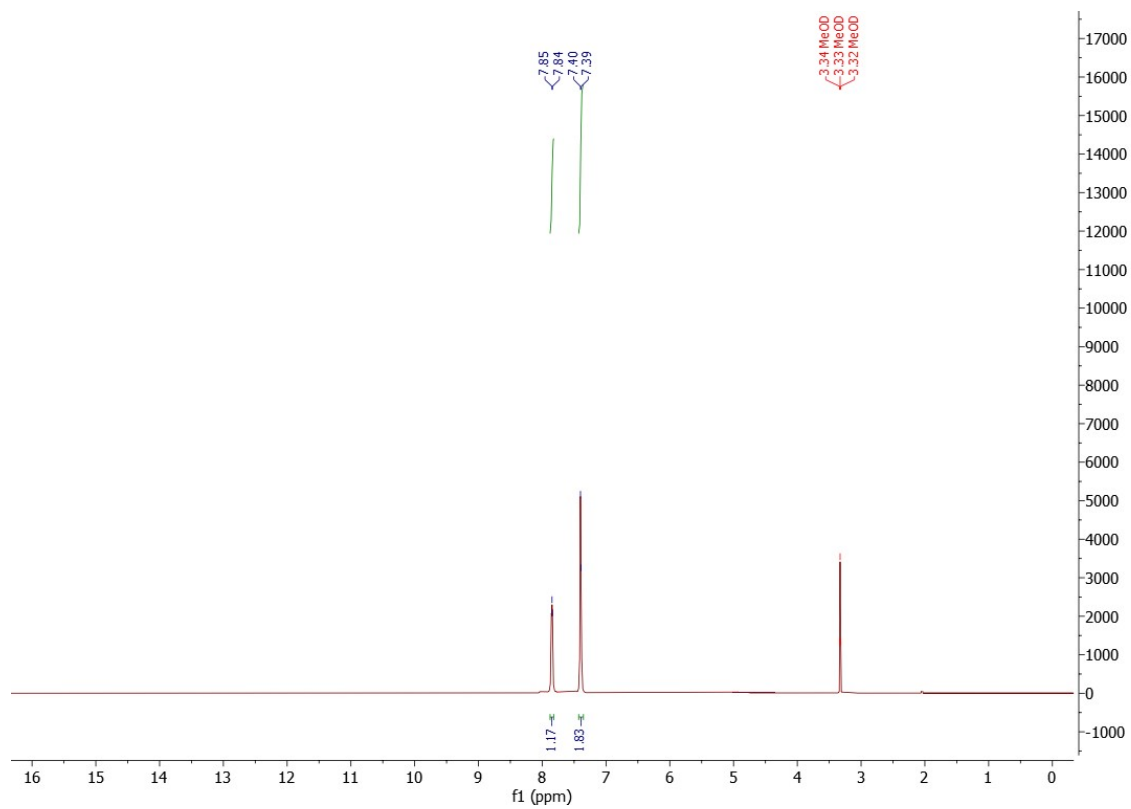

**Figure S12.**  $^1\text{H-NMR}$  of  $\text{NaL}^{\text{Ph}}$  (**3**) in  $\text{CD}_3\text{OD}$ .

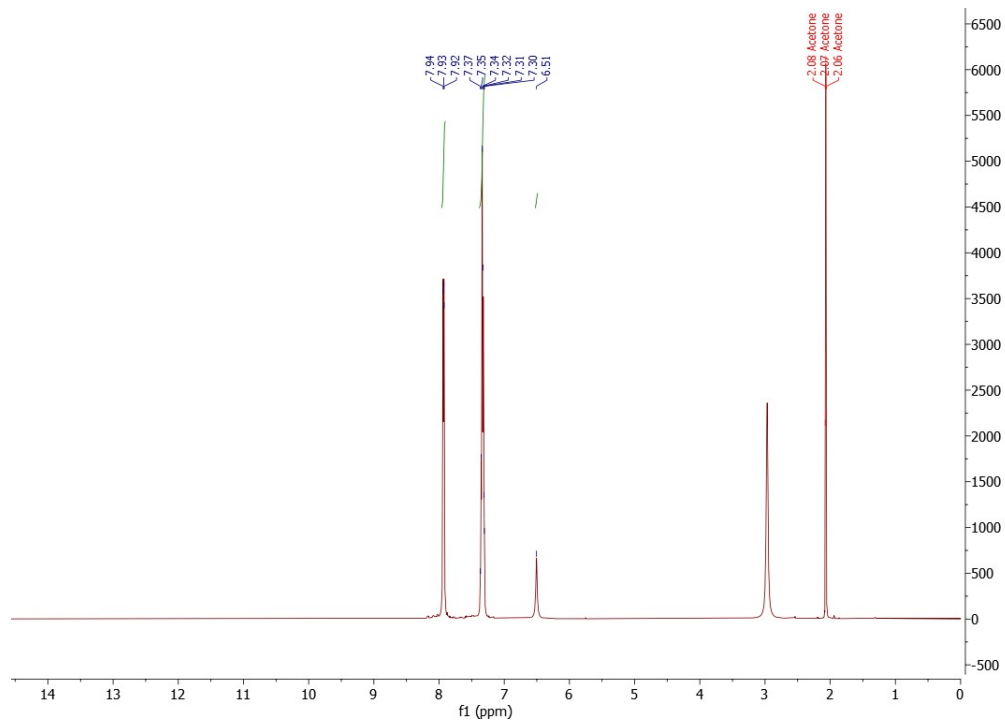

**Figure S13.**  $^1\text{H-NMR}$  of  $\text{NaL}^{\text{Ph}}$  (**3**) in  $\text{Acetone-d}_6$ .

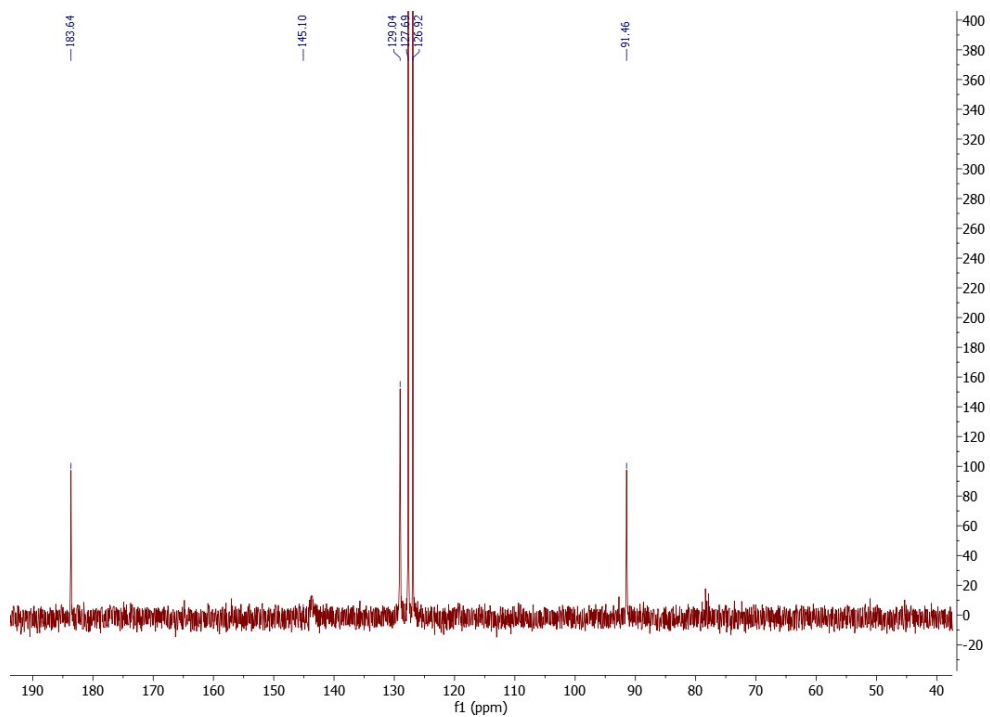

**Figure S14.**  $^{13}\text{C}\{^1\text{H}\}$ -NMR of  $\text{NaL}^{\text{Ph}}$  (**3**) in  $\text{Acetone-}d_6$ .

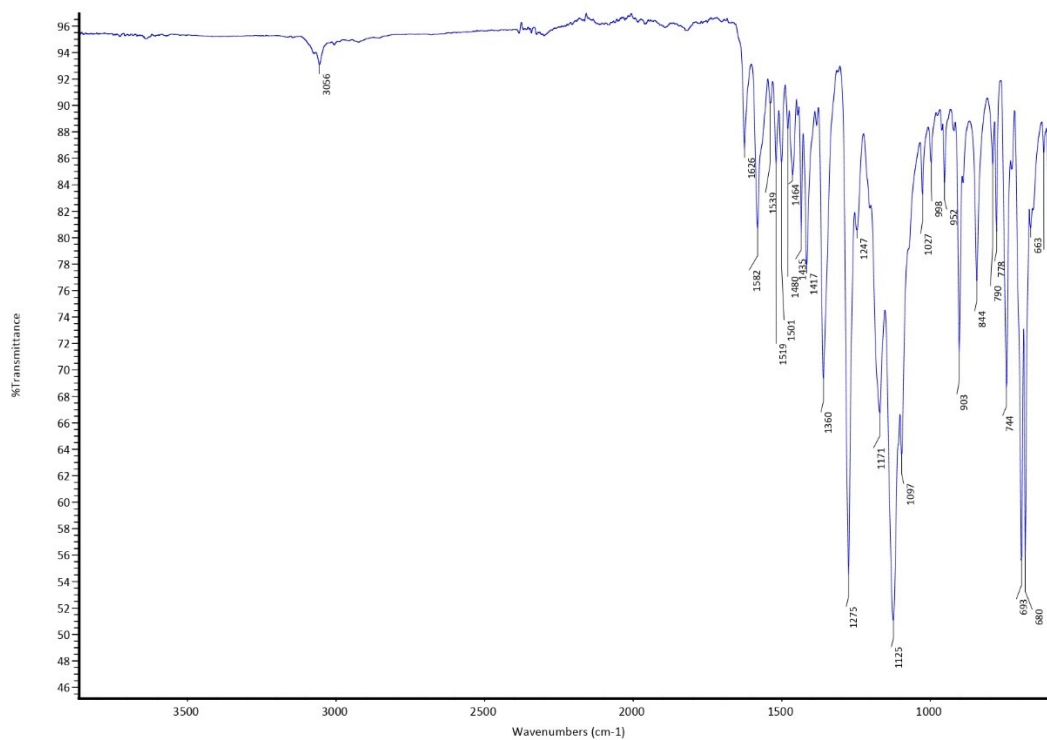

**Figure S15.** FT-IR spectrum of  $[\text{Cu}(\text{L}^{\text{CF}_3})(\text{PPh}_3)_2]$  (**4**).

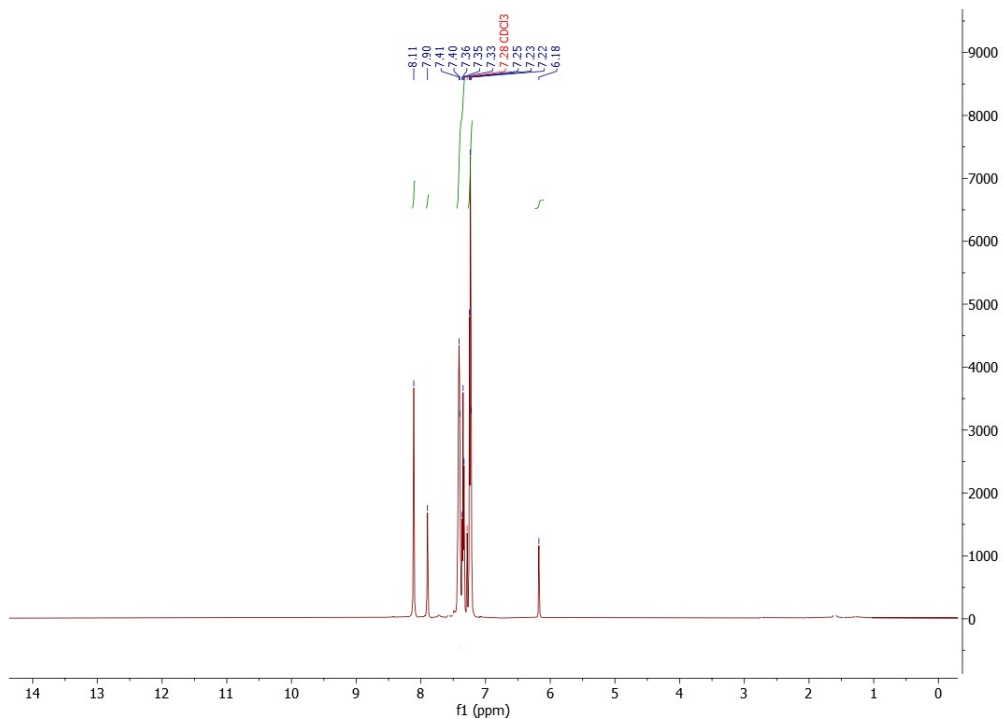

**Figure S16.** <sup>1</sup>H-NMR spectrum of [Cu(L<sup>CF3</sup>)(PPh<sub>3</sub>)<sub>2</sub>] (4) in CDCl<sub>3</sub>.

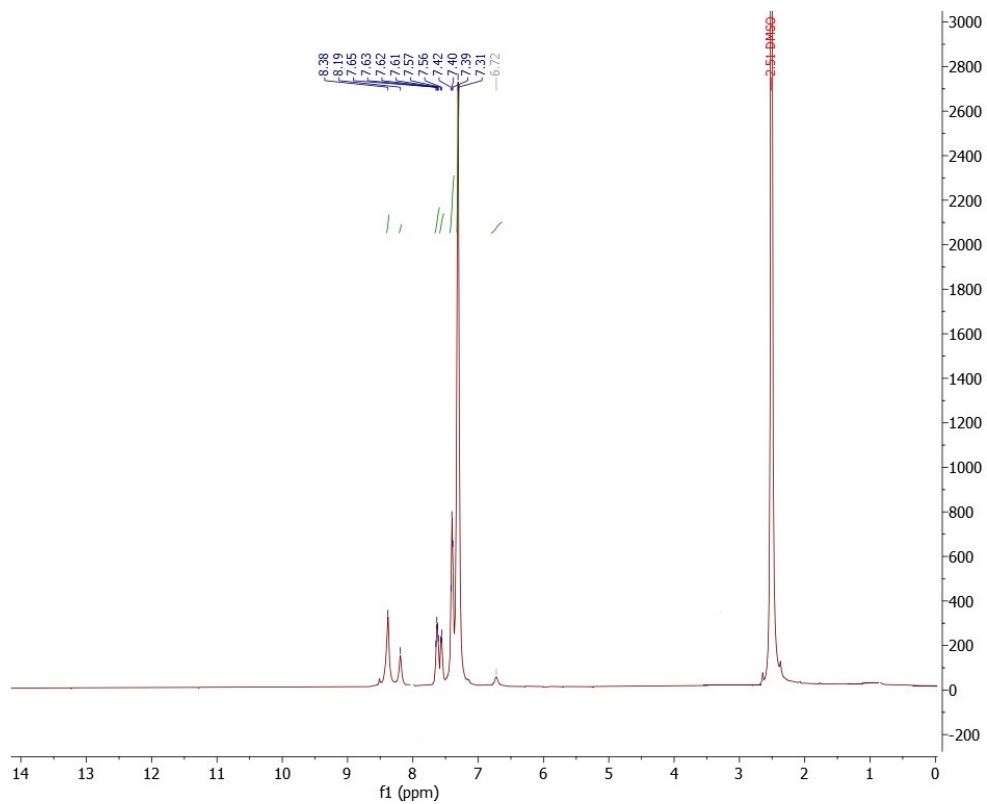

**Figure S17.** <sup>1</sup>H-NMR spectrum of [Cu(L<sup>CF3</sup>)(PPh<sub>3</sub>)<sub>2</sub>] (4) in DMSO-d<sub>6</sub>.

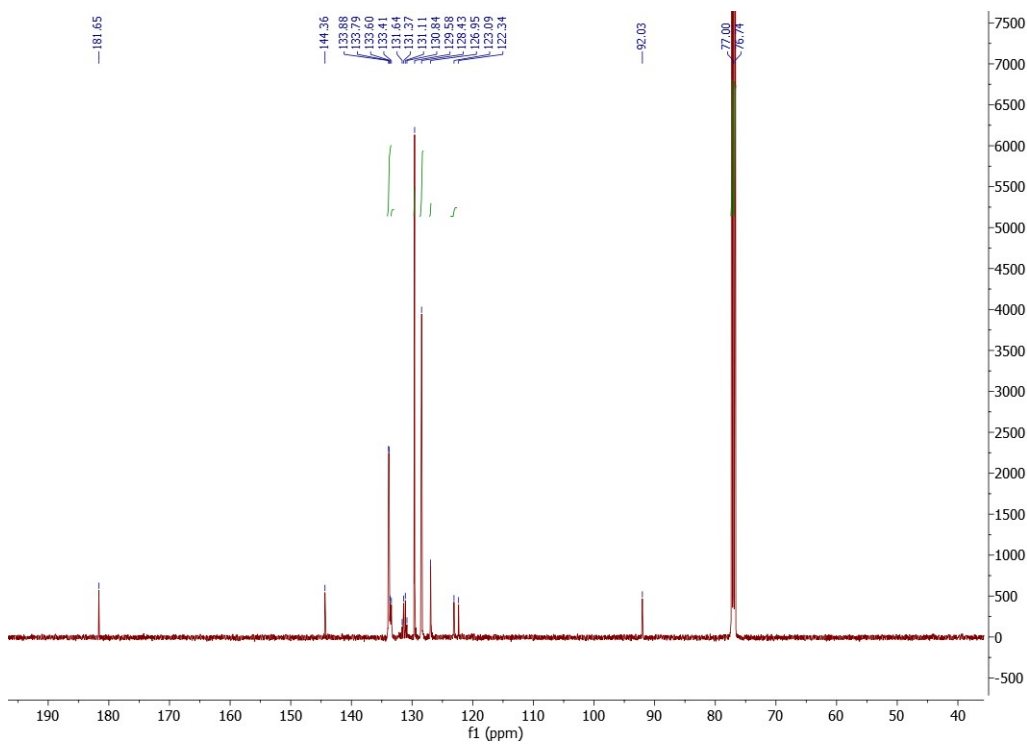

**Figure S18.**  $^{13}\text{C}\{^1\text{H}\}$ -NMR of  $[\text{Cu}(\text{L}^{\text{CF}_3})(\text{PPh}_3)_2]$  (**4**) in  $\text{CDCl}_3$ .

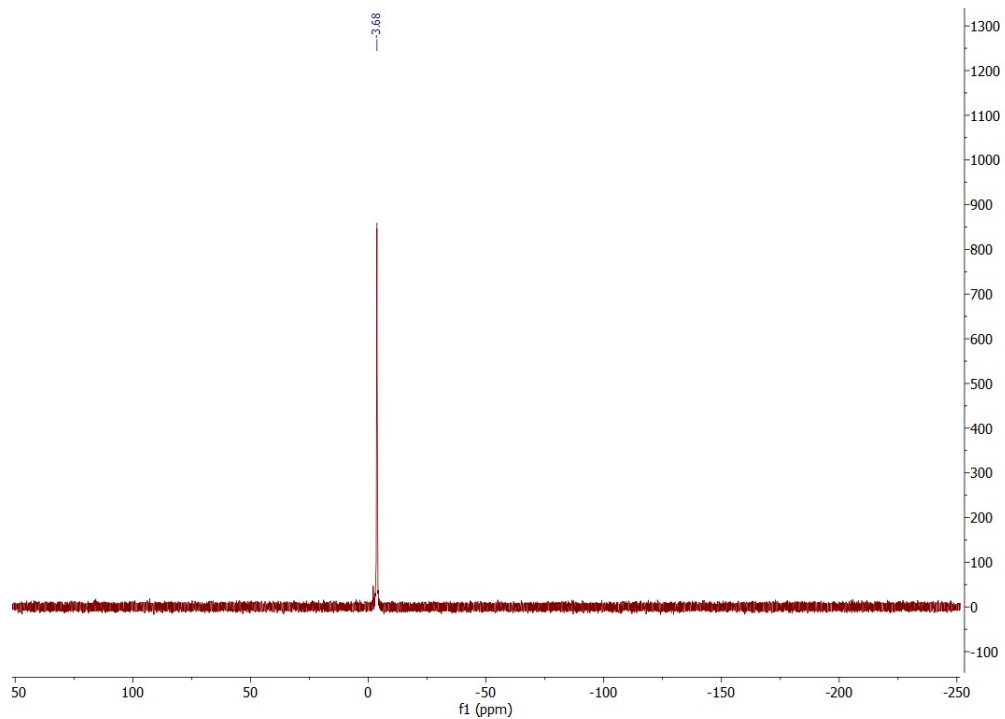

**Figure S19.**  $^{31}\text{P}\{^1\text{H}\}$ -NMR spectrum of  $[\text{Cu}(\text{L}^{\text{CF}_3})(\text{PPh}_3)_2]$  (**4**) in  $\text{CDCl}_3$  at 223 K.

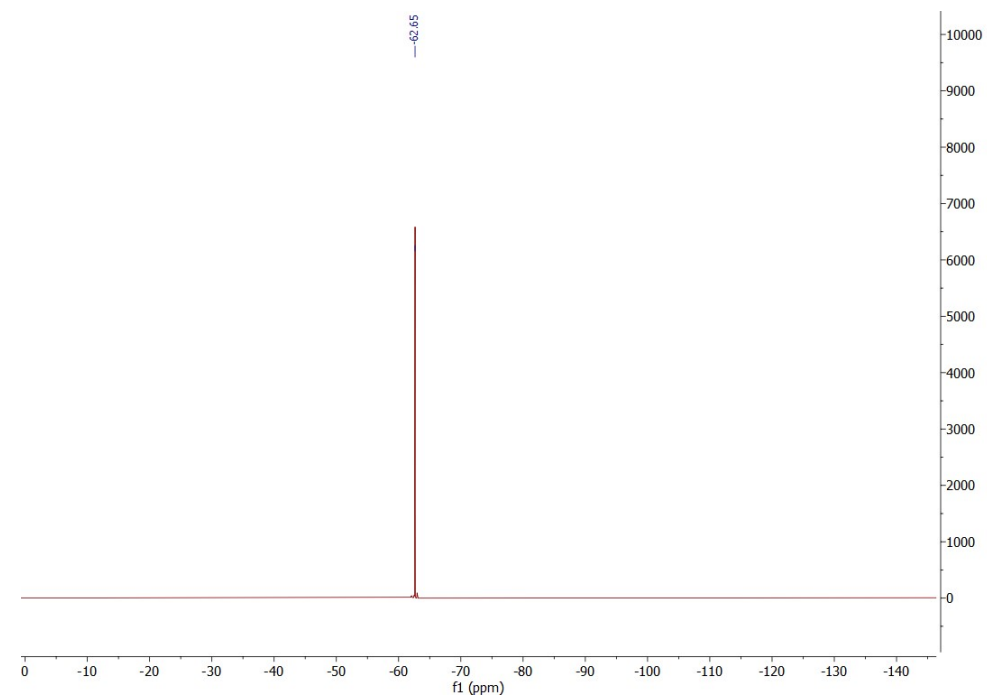

**Figure S20.**  $^{19}\text{F}\{^1\text{H}\}$ -NMR spectrum of  $[\text{Cu}(\text{L}^{\text{CF}_3})(\text{PPh}_3)_2]$  (**4**) in  $\text{CDCl}_3$ .

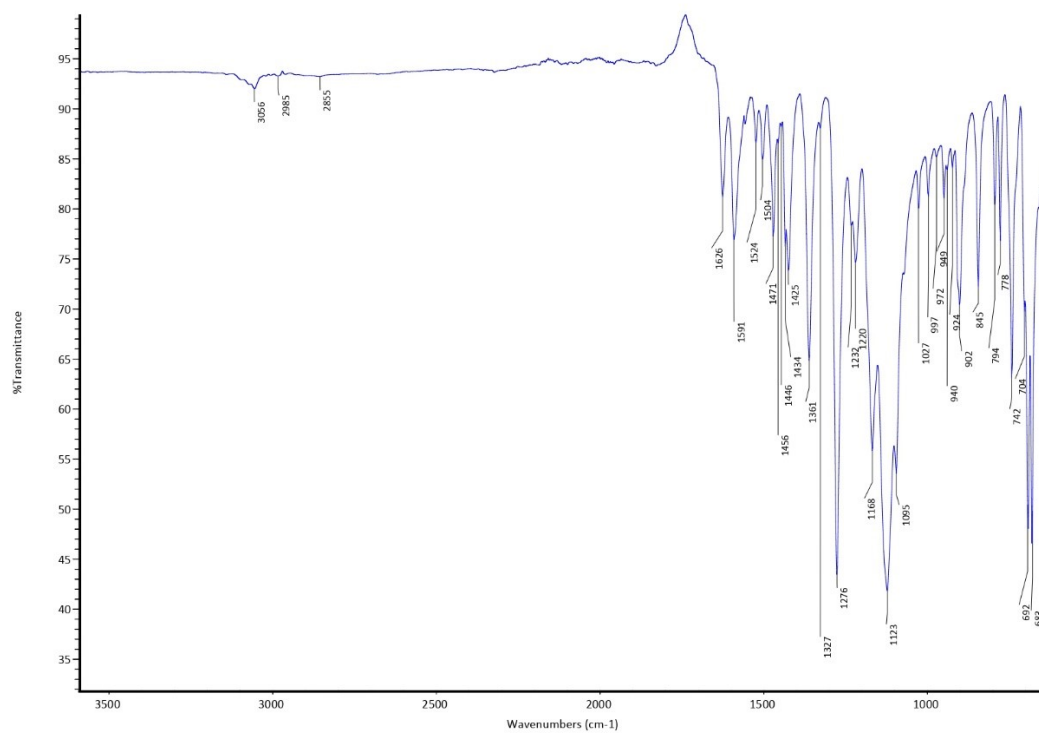

**Figure S21.** FT-IR spectrum of  $[\text{Ag}(\text{L}^{\text{CF}_3})(\text{PPh}_3)_2]$  (**5**).

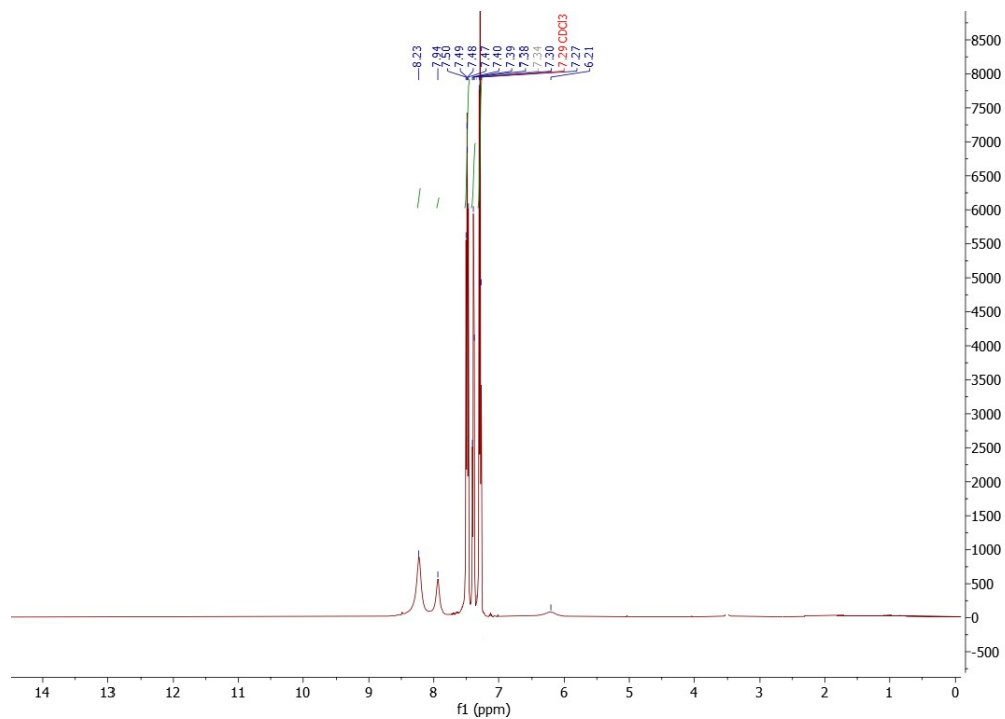

**Figure S22.**  $^1\text{H-NMR}$  spectrum of  $[\text{Ag}(\text{L}^{\text{CF}_3})(\text{PPh}_3)_2]$  (**5**) in  $\text{CDCl}_3$ .

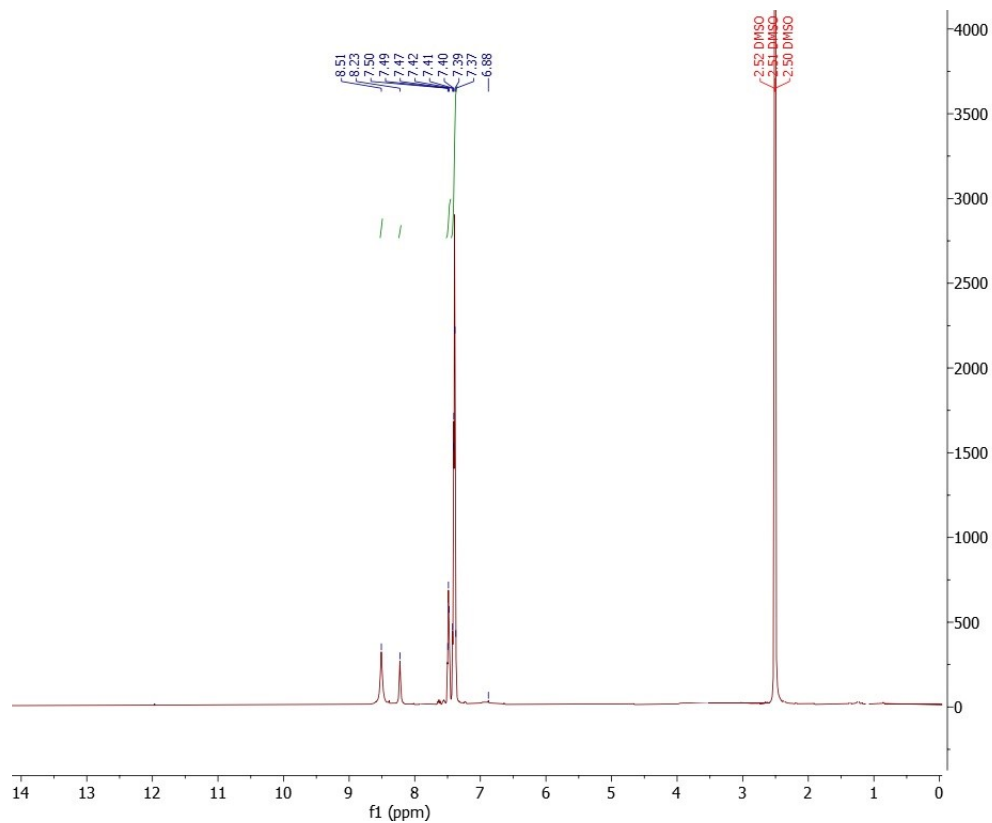

**Figure S23.**  $^1\text{H-NMR}$  spectrum of  $[\text{Ag}(\text{L}^{\text{CF}_3})(\text{PPh}_3)_2]$  (**5**) in  $\text{DMSO-d}_6$ .



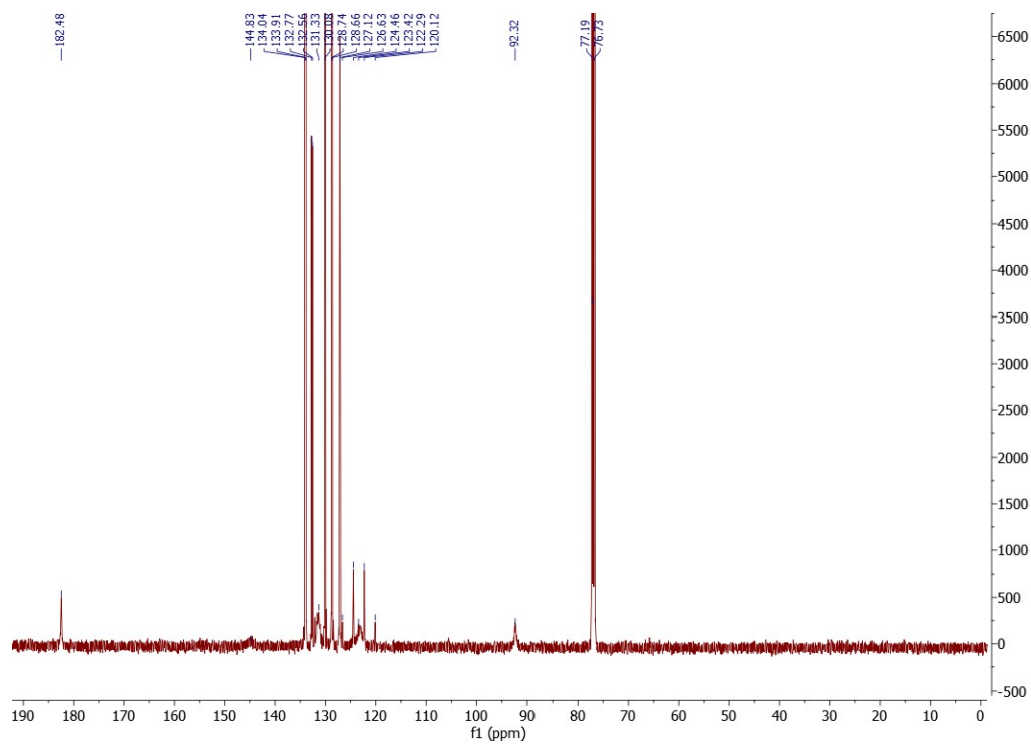

**Figure S24.**  $^{13}\text{C}\{^1\text{H}\}$ -NMR of  $[\text{Ag}(\text{L}^{\text{CF}_3})(\text{PPh}_3)_2]$  (**5**) in  $\text{CDCl}_3$ .

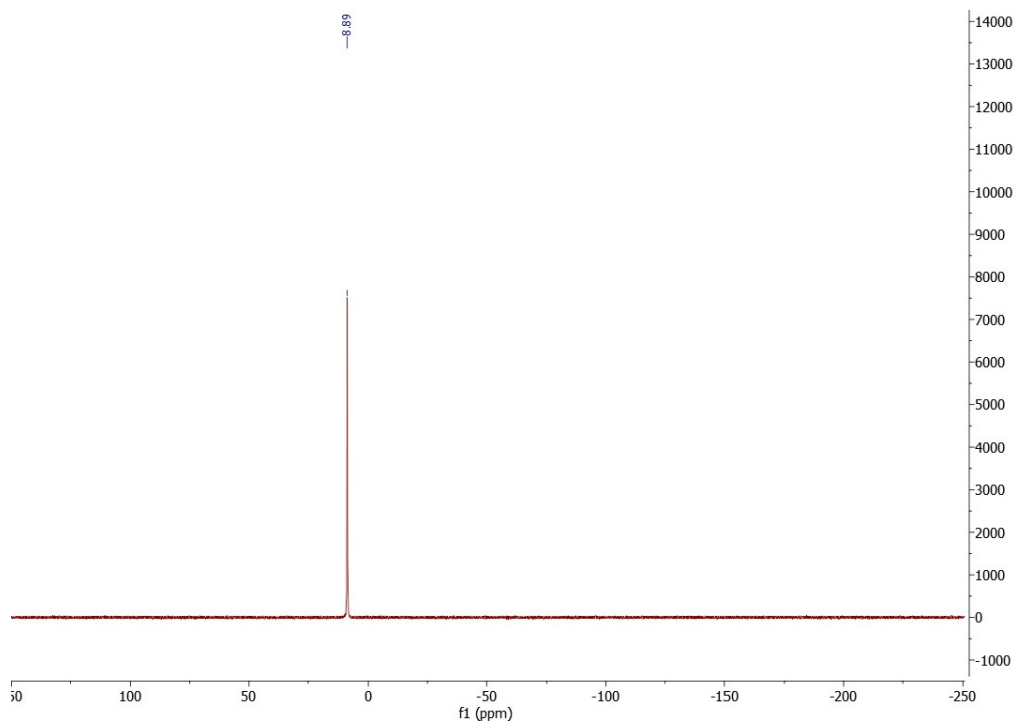

**Figure S25.**  $^{31}\text{P}\{^1\text{H}\}$ -NMR spectrum of  $[\text{Ag}(\text{L}^{\text{CF}_3})(\text{PPh}_3)_2]$  (**5**) in  $\text{CDCl}_3$ .

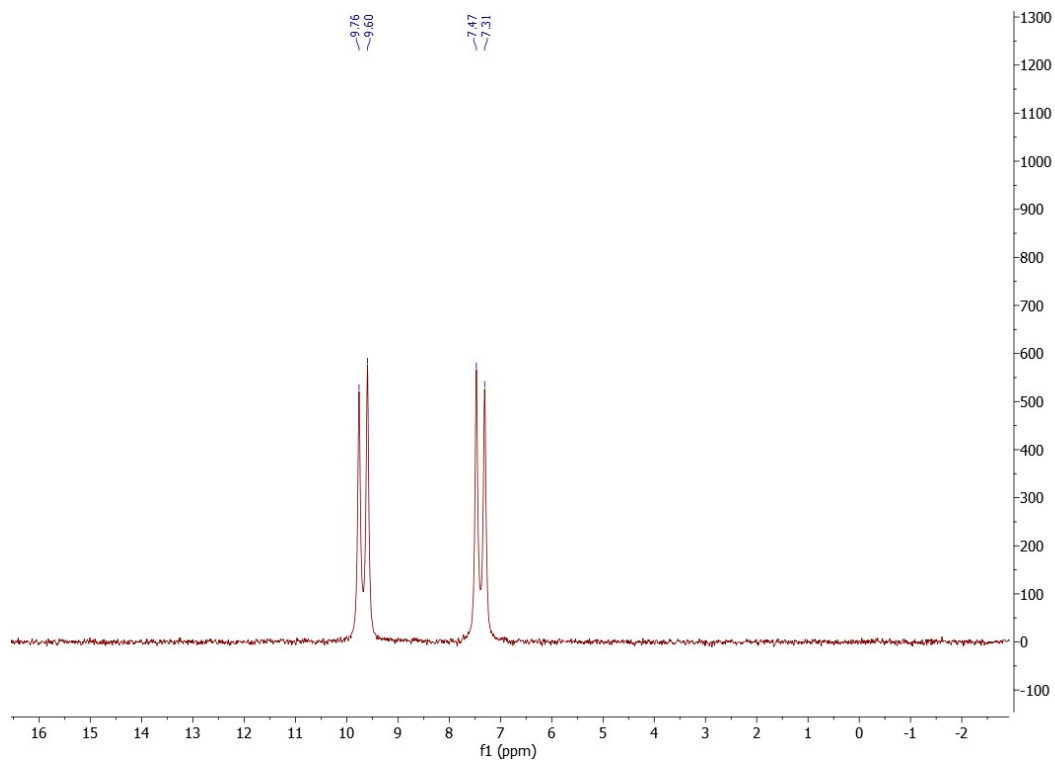

**Figure S26.**  $^{31}\text{P}\{^1\text{H}\}$ -NMR spectrum of  $[\text{Ag}(\text{L}^{\text{CF}_3})(\text{PPh}_3)_2]$  (**5**) in  $\text{CDCl}_3$  at 223K.

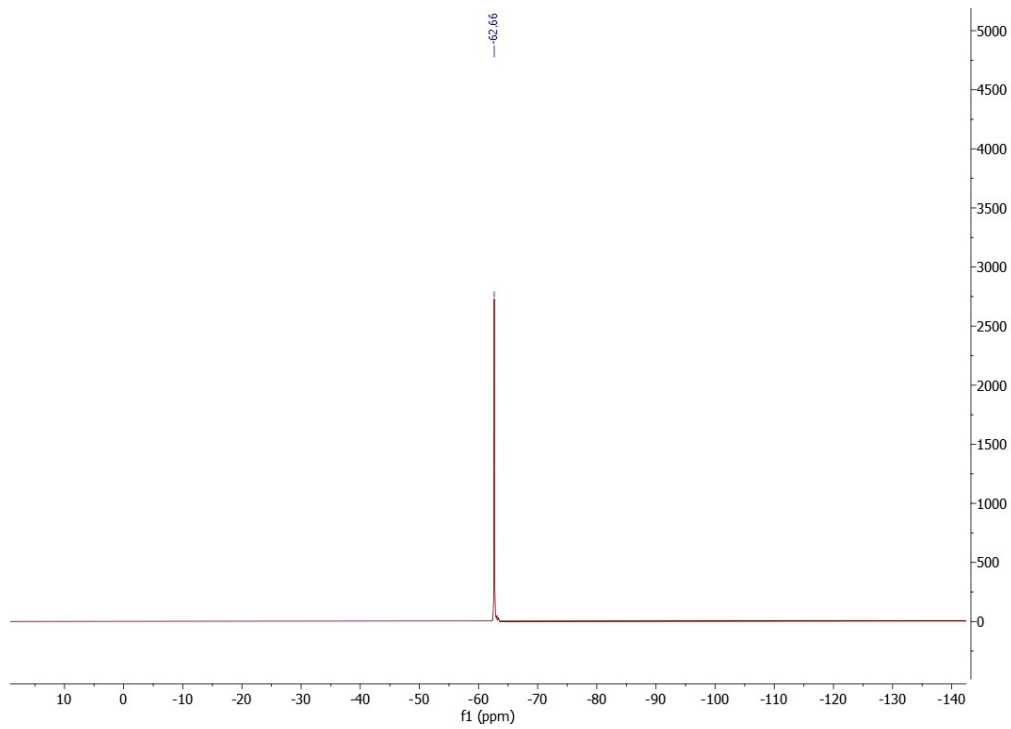

**Figure S27.**  $^{19}\text{F}\{^1\text{H}\}$ -NMR spectrum of  $[\text{Ag}(\text{L}^{\text{CF}_3})(\text{PPh}_3)_2]$  (**5**) in  $\text{CDCl}_3$ .

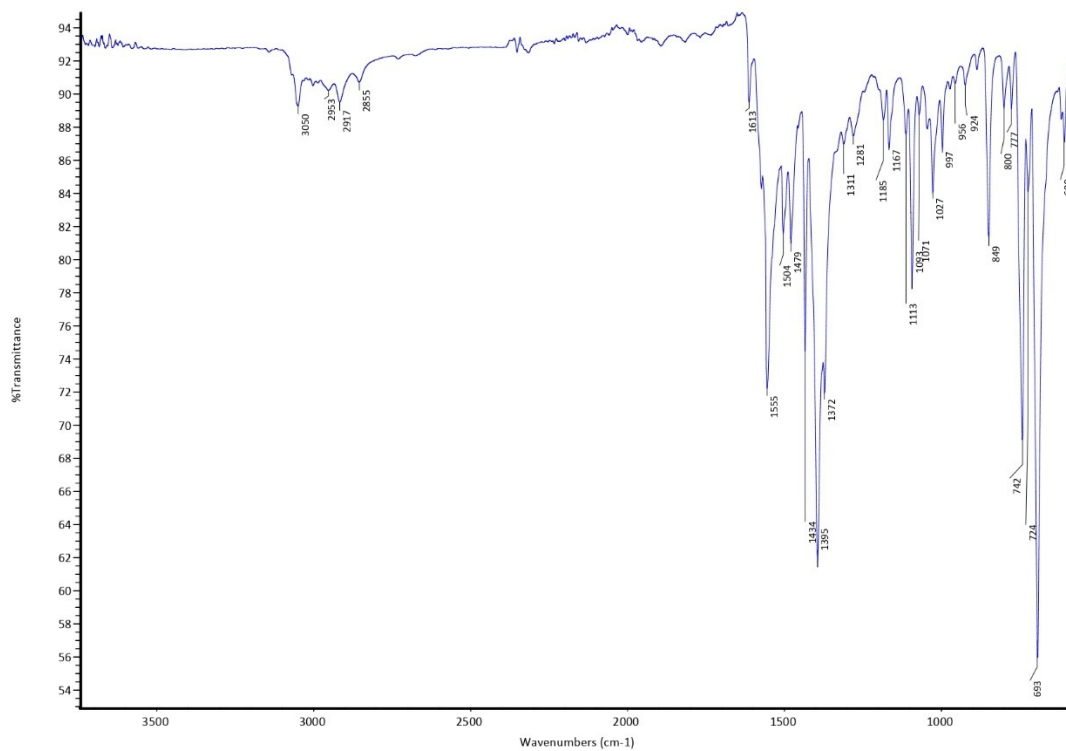

**Figure S28.** FT-IR spectrum of  $[\text{Cu}(\text{L}^{\text{Mes}})(\text{PPh}_3)_2]$  (**6**).

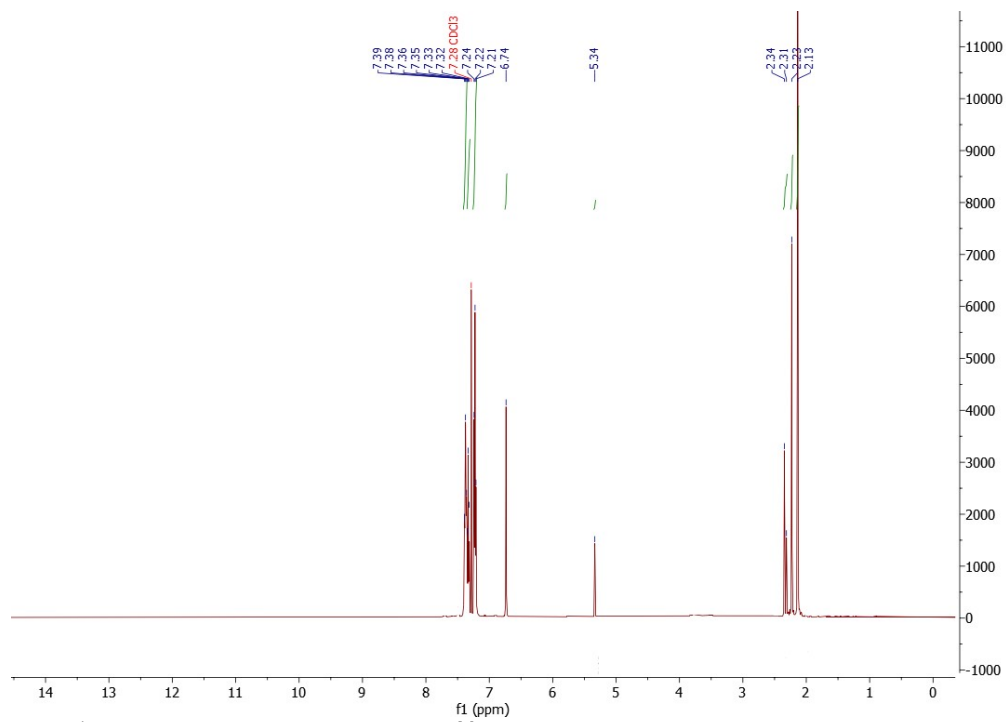

**Figure S29.**  $^1\text{H}$ -NMR spectrum of  $[\text{Cu}(\text{L}^{\text{Mes}})(\text{PPh}_3)_2]$  (**6**) in  $\text{CDCl}_3$ .

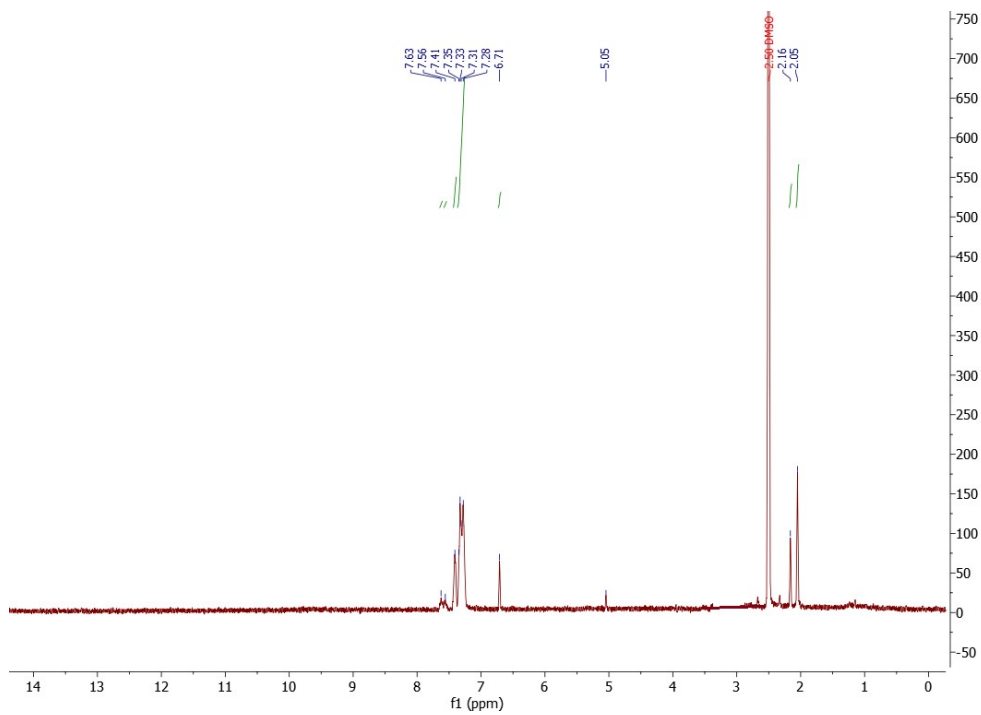

**Figure S30.**  $^1\text{H-NMR}$  spectrum of  $[\text{Cu}(\text{L}^{\text{Mes}})(\text{PPh}_3)_2]$  (**6**) in  $\text{DMSO-d}_6$ .

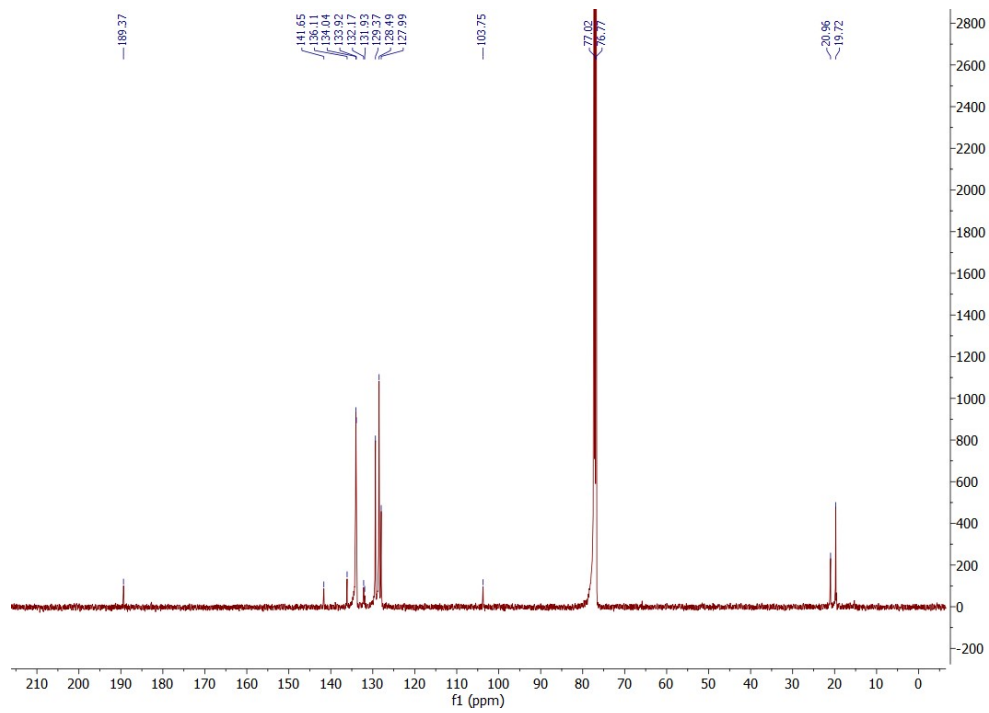

**Figure S31.**  $^{13}\text{C}\{^1\text{H}\}$ -NMR of  $[\text{Cu}(\text{L}^{\text{Mes}})(\text{PPh}_3)_2]$  (**6**) in  $\text{CDCl}_3$ .

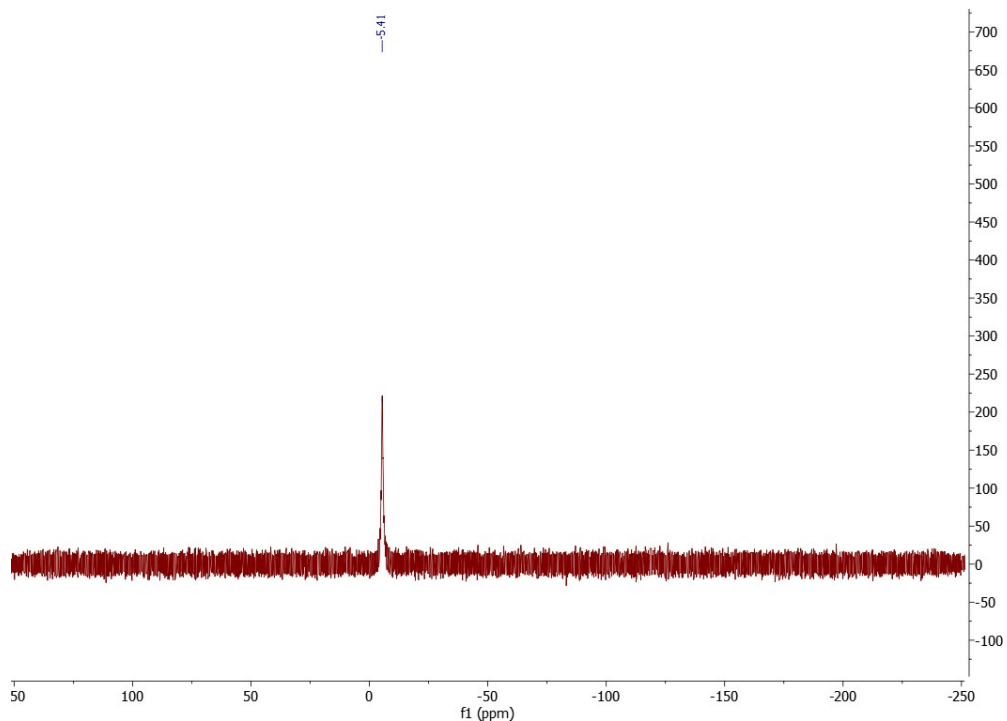

**Figure S32.**  $^{31}\text{P}\{^1\text{H}\}$ -NMR spectrum of  $[\text{Cu}(\text{L}^{\text{Mes}})(\text{PPh}_3)_2]$  (**6**) in  $\text{CD}_2\text{Cl}_2$ .

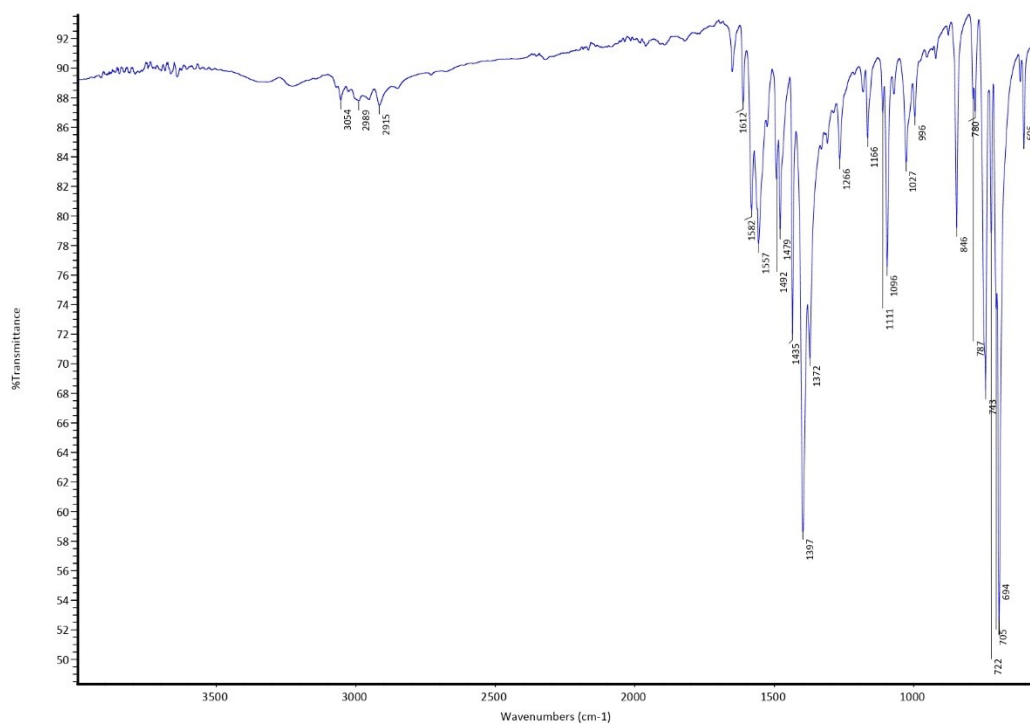

**Figure S33.** FT-IR spectrum of  $[\text{Ag}(\text{L}^{\text{Mes}})(\text{PPh}_3)_2]$  (**7**).

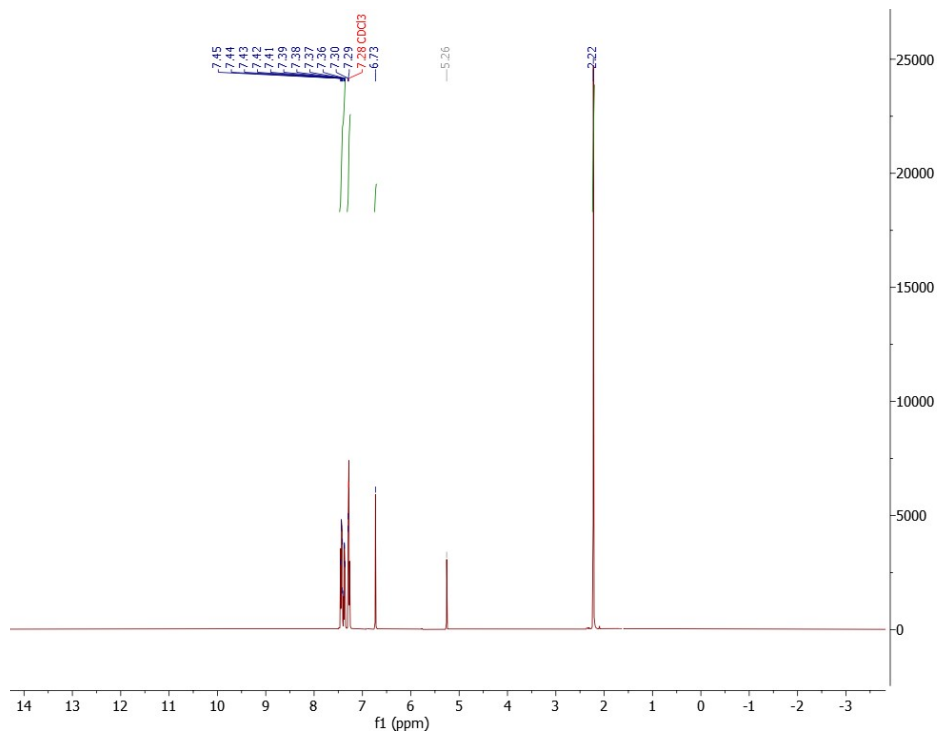

Figure S34.  $^1\text{H-NMR}$  spectrum of  $[\text{Ag}(\text{L}^{\text{Mes}})(\text{PPh}_3)_2]$  (**7**) in  $\text{CDCl}_3$ .

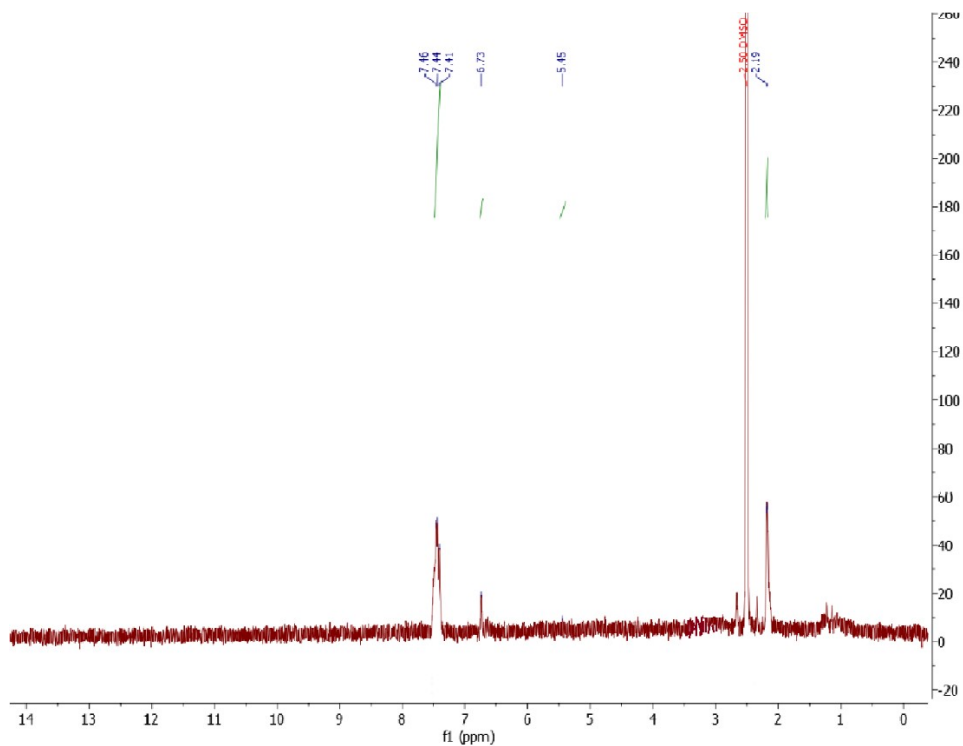

Figure S35.  $^1\text{H-NMR}$  spectrum of  $[\text{Ag}(\text{L}^{\text{Mes}})(\text{PPh}_3)_2]$  (**7**) in  $\text{DMSO-d}_6$ .

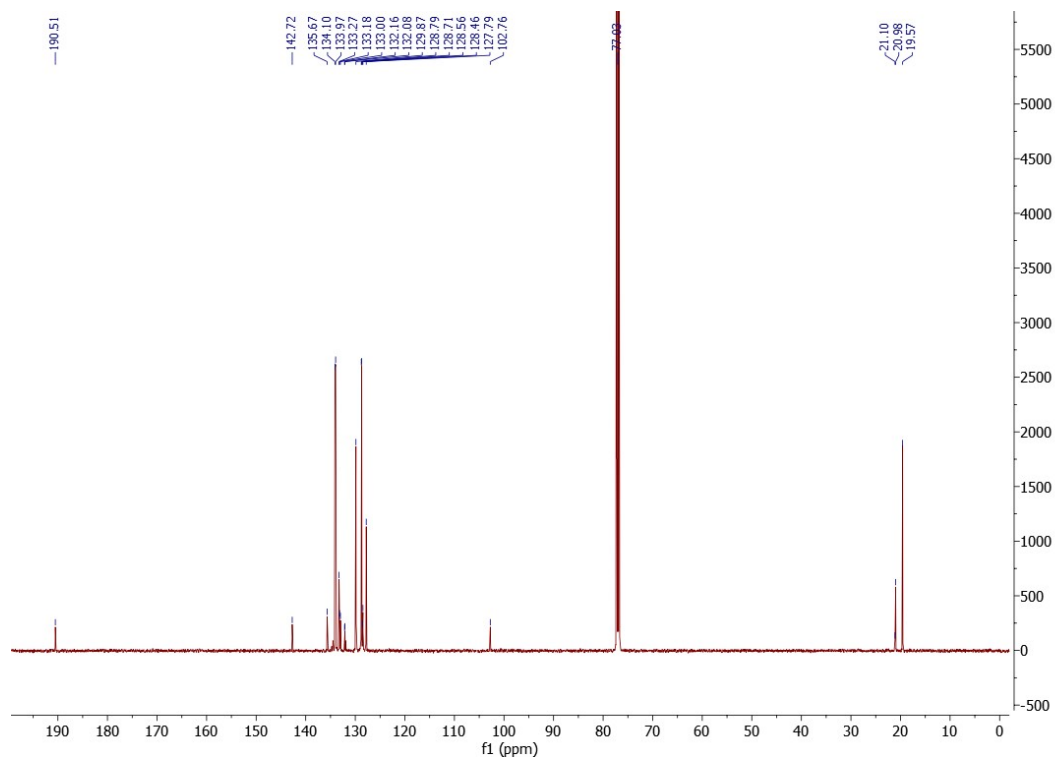

Figure S36.  $^{13}\text{C}\{^1\text{H}\}$ -NMR of  $[\text{Ag}(\text{L}^{\text{Mes}})(\text{PPh}_3)_2]$  (**7**) in  $\text{CDCl}_3$ .

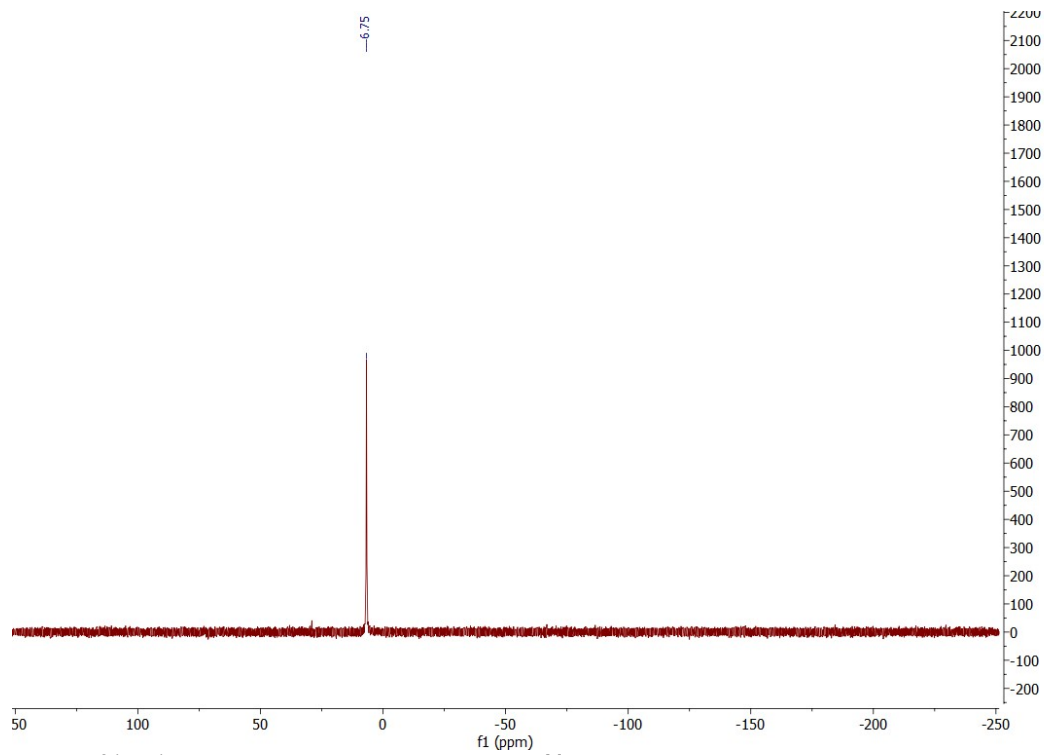

Figure S37.  $^{31}\text{P}\{^1\text{H}\}$ -NMR spectrum of  $[\text{Ag}(\text{L}^{\text{Mes}})(\text{PPh}_3)_2]$  (**7**) in  $\text{CDCl}_3$ .

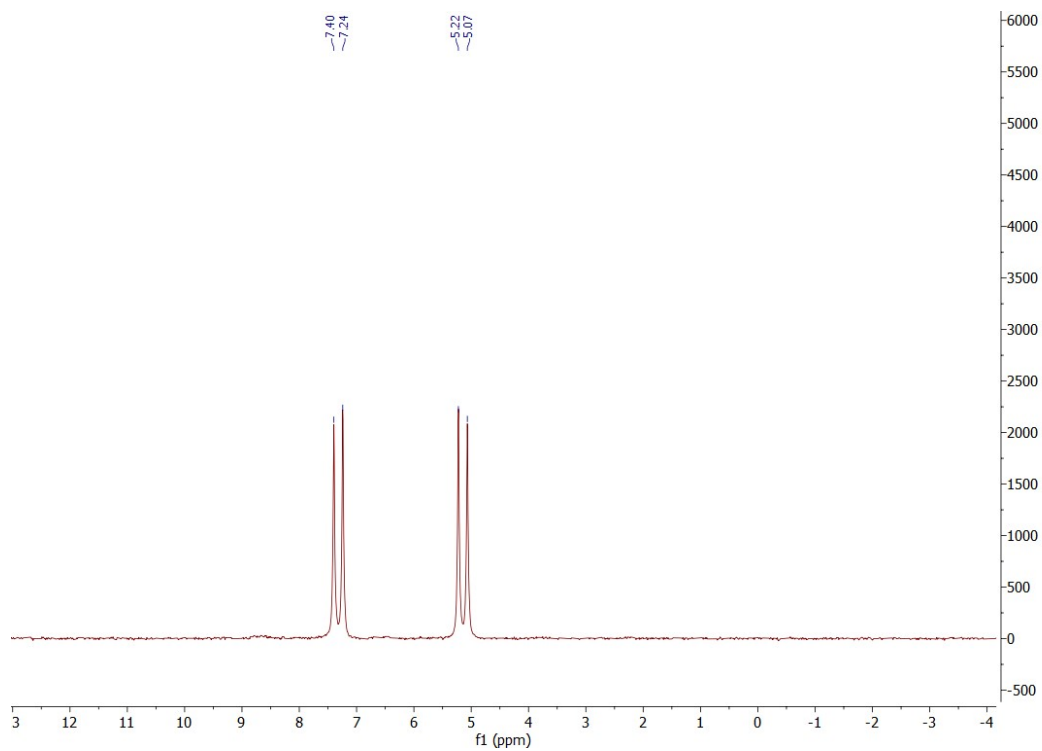

**Figure S38.**  $^{31}\text{P}\{^1\text{H}\}$ -NMR spectrum of  $[\text{Ag}(\text{LMes})(\text{PPh}_3)_2]$  (**7**) in  $\text{CDCl}_3$  at 223K.

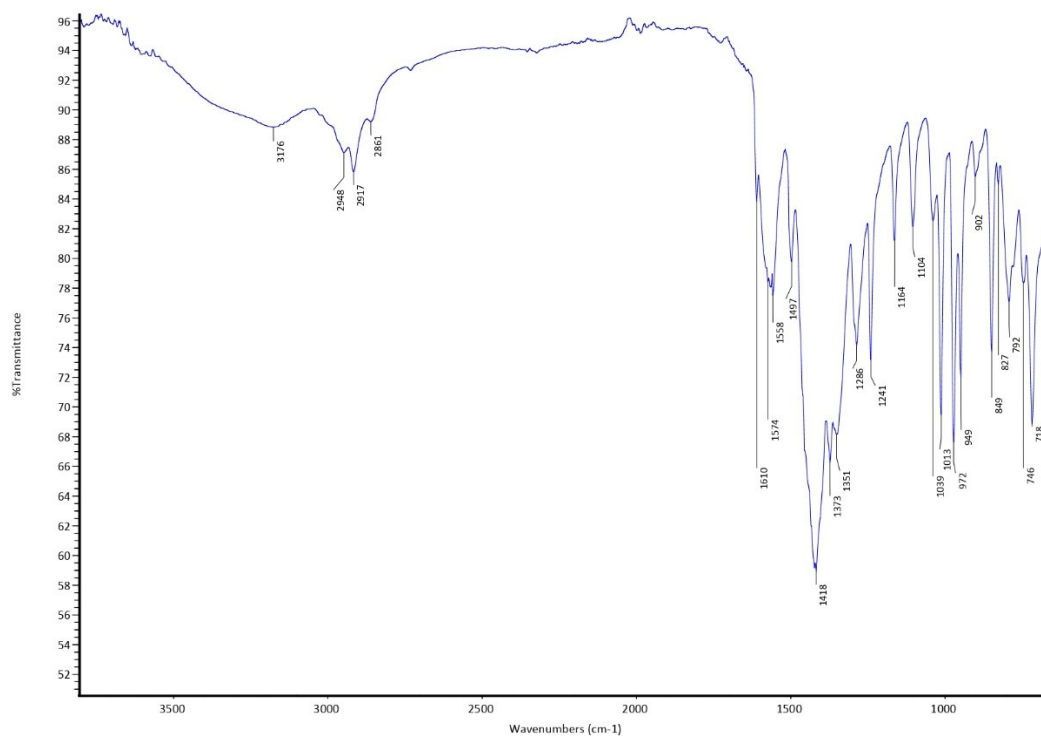

**Figure S39.** FT-IR spectrum of  $[\text{Ag}(\text{LMes})(\text{PTA})]$  (**8**).



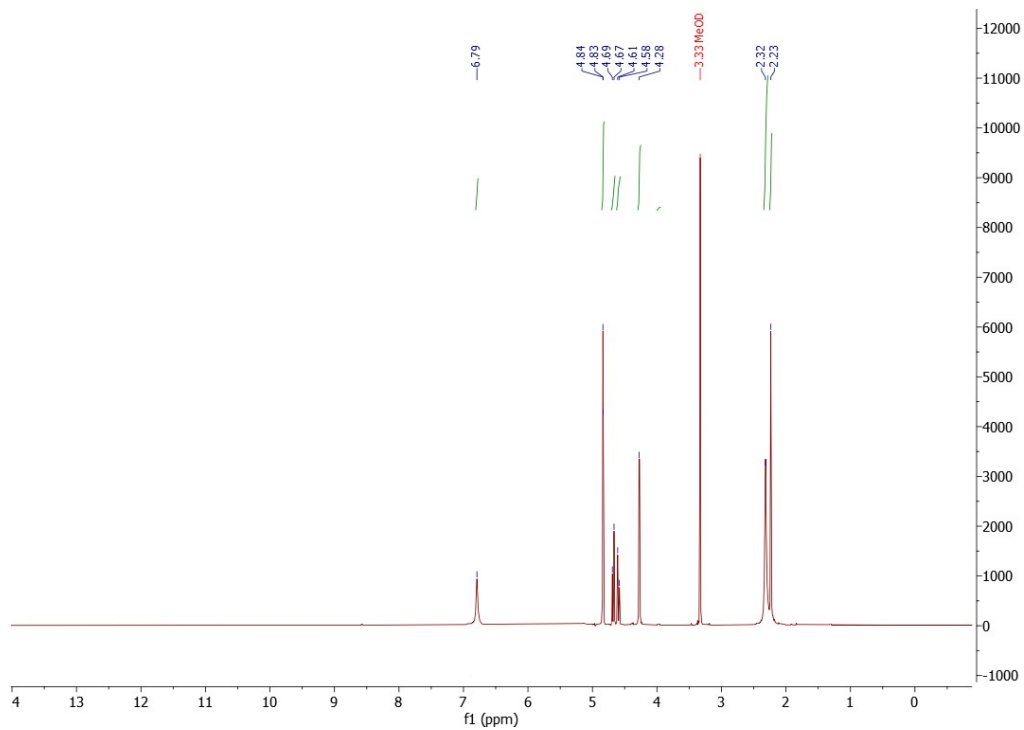

**Figure S40.**  $^1\text{H-NMR}$  spectrum of  $[\text{Ag}(\text{L}^{\text{Mes}})(\text{PTA})]$  (**8**) in  $\text{CD}_3\text{OD}$ .

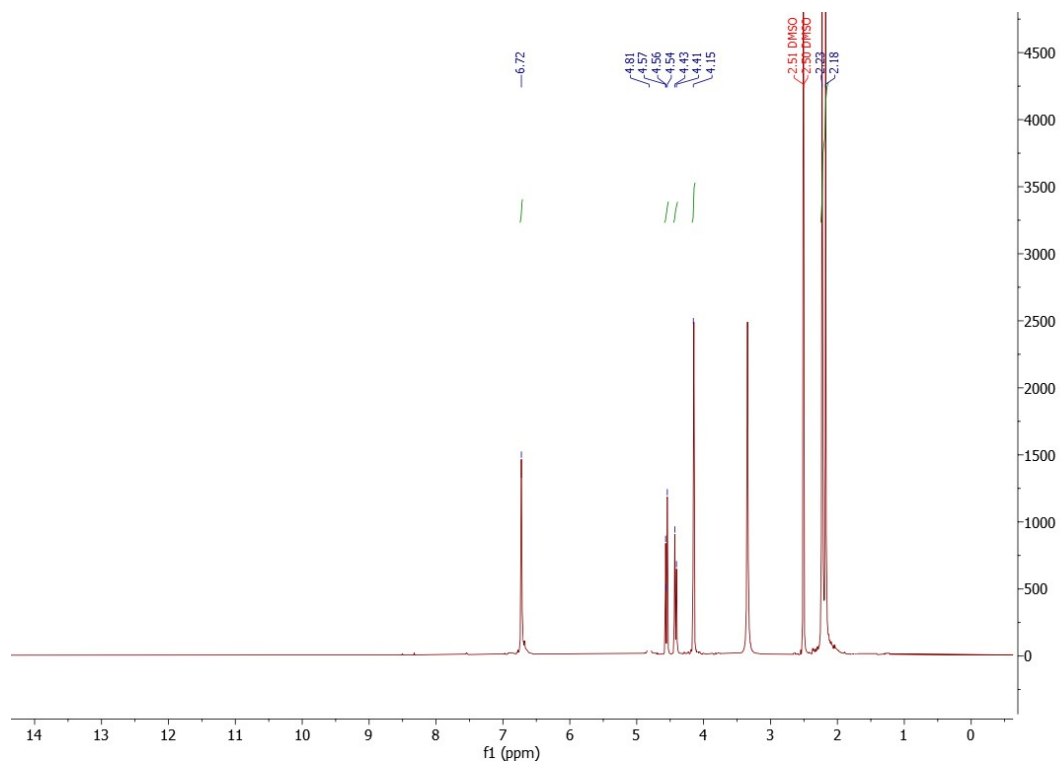

**Figure S41.**  $^1\text{H-NMR}$  spectrum of  $[\text{Ag}(\text{L}^{\text{Mes}})(\text{PTA})]$  (**8**) in  $\text{DMSO-d}_6$ .

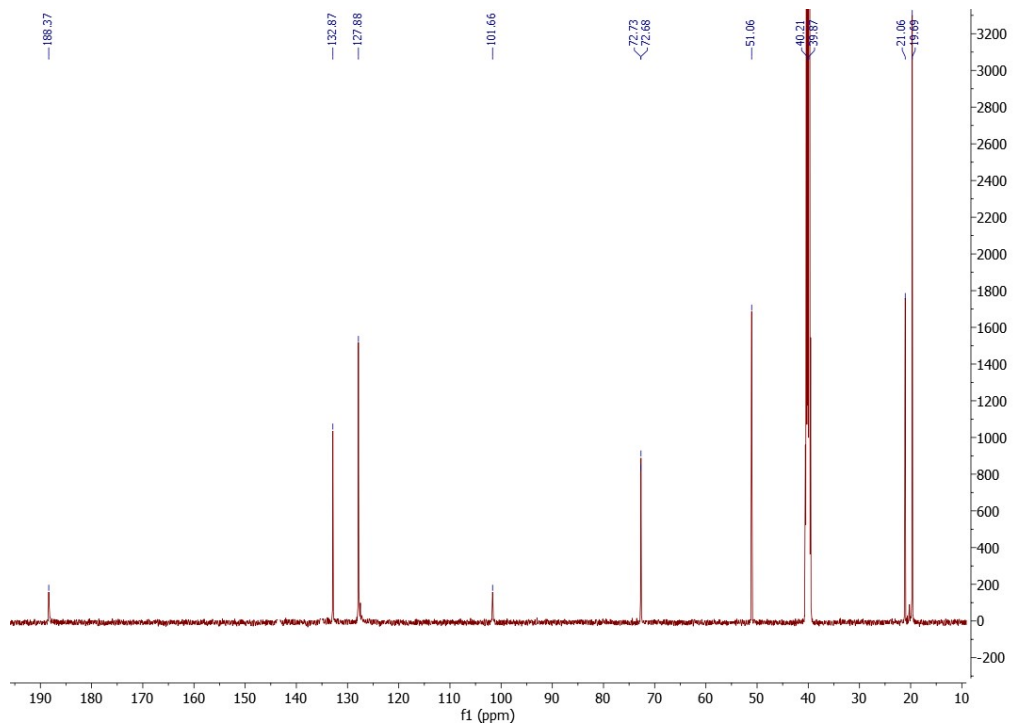

**Figure S42.**  $^{13}\text{C}\{^1\text{H}\}$ -NMR of  $[\text{Ag}(\text{L}^{\text{Mes}})(\text{PTA})]$  (**8**) in  $\text{DMSO-d}_6$ .

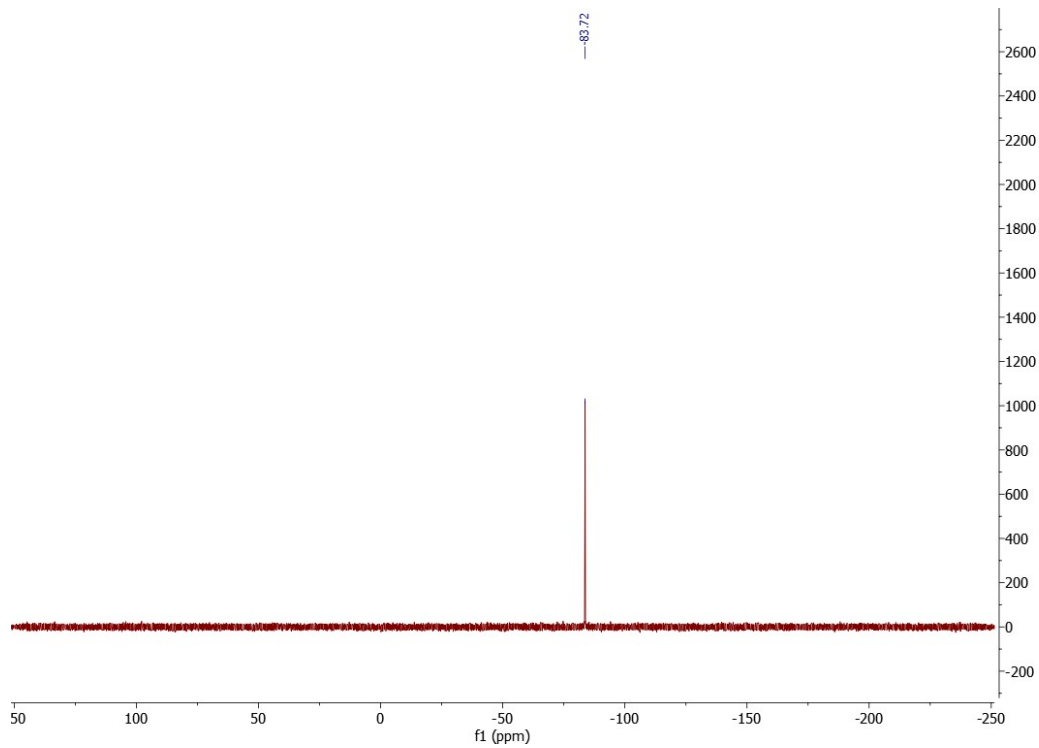

**Figure S43.**  $^{31}\text{P}\{^1\text{H}\}$ -NMR spectrum of  $[\text{Ag}(\text{L}^{\text{Mes}})(\text{PTA})]$  (**8**) in  $\text{CD}_3\text{OD}$ .

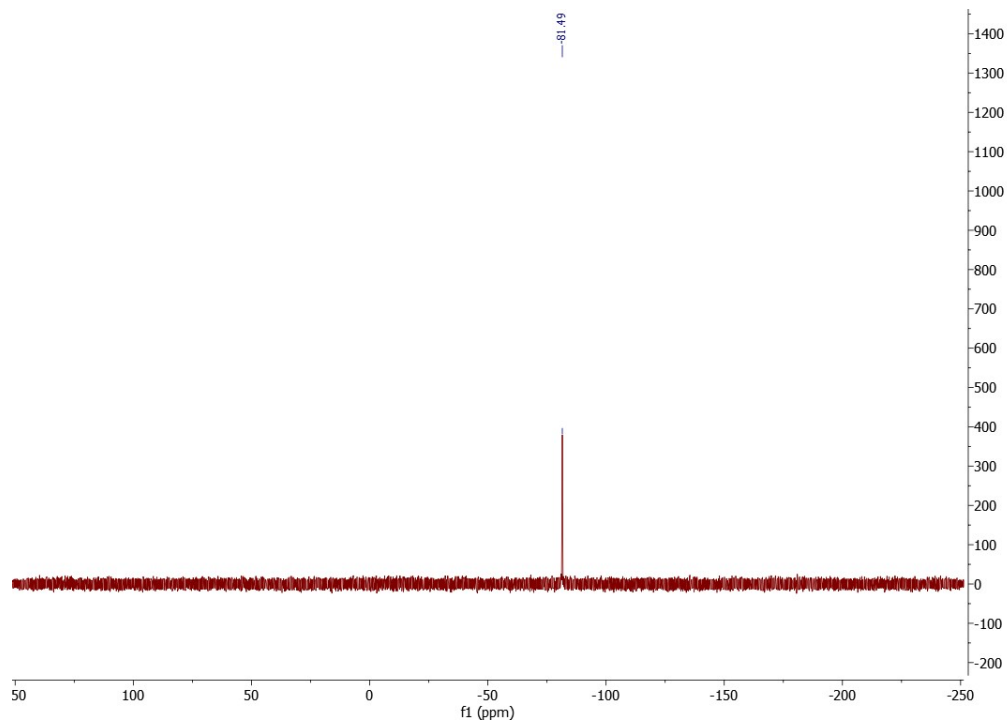

**Figure S44.**  $^{31}\text{P}\{^1\text{H}\}$ -NMR spectrum of  $[\text{Ag}(\text{L}^{\text{Mes}})(\text{PTA})]$  (**8**) in  $\text{D}_2\text{O}$ .

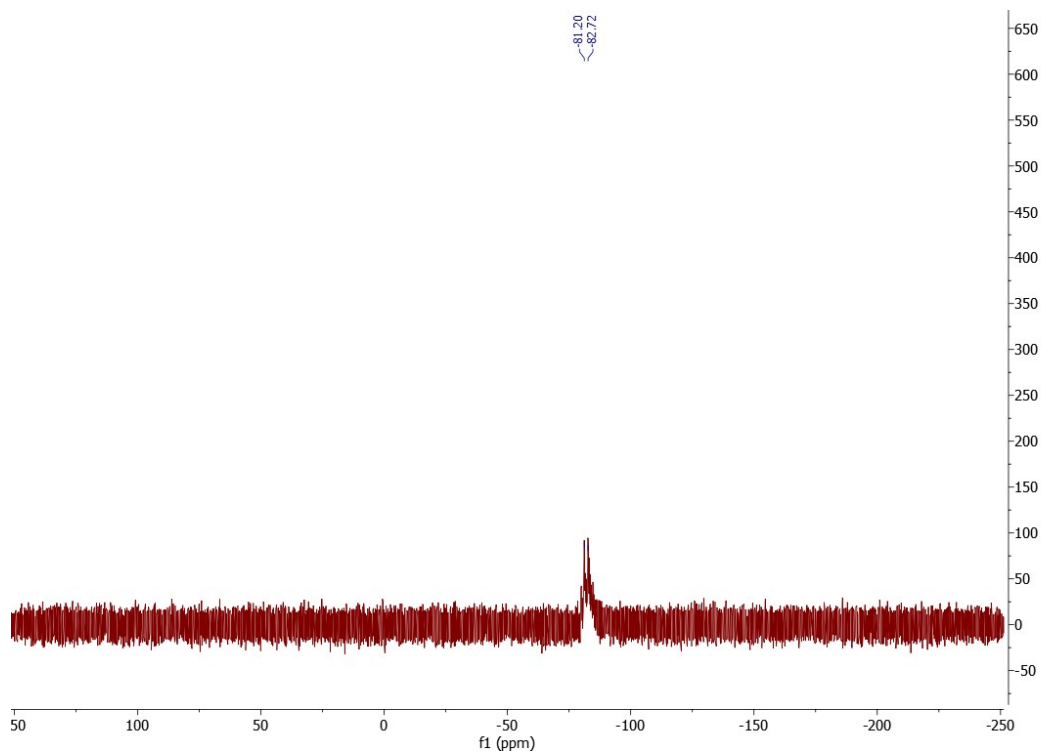

**Figure S45.**  $^{31}\text{P}\{^1\text{H}\}$ -NMR spectrum of  $[\text{Ag}(\text{L}^{\text{Mes}})(\text{PTA})]$  (**8**) in  $\text{CD}_3\text{OD}$  at 223 K.

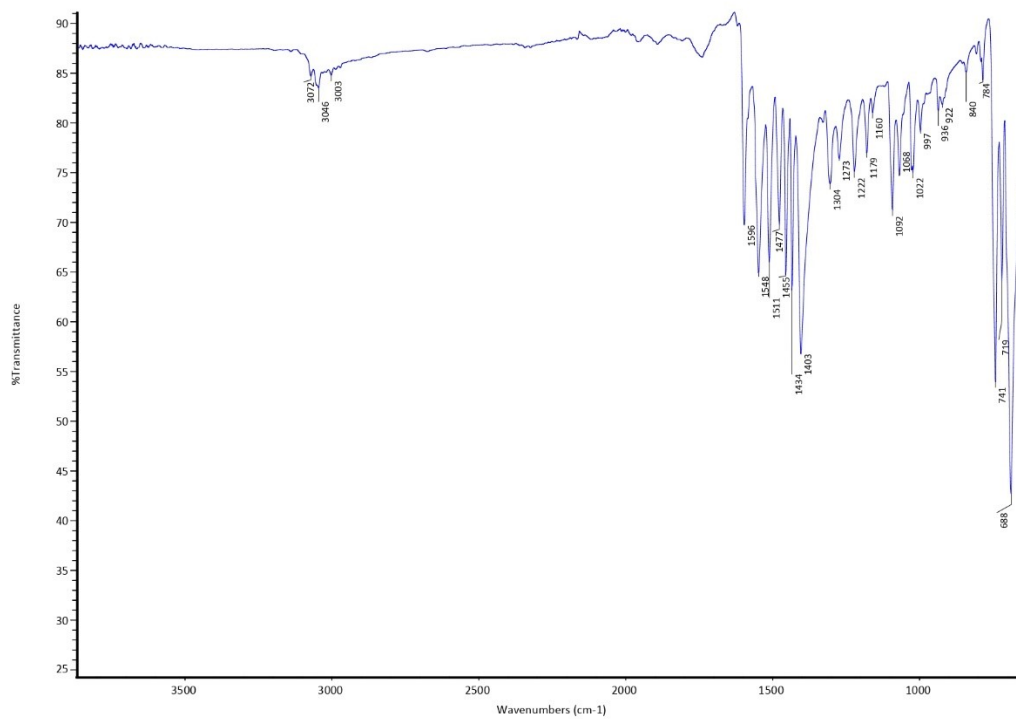

**Figure S46.** FT-IR spectrum of  $[\text{Cu}(\text{L}^{\text{Ph}})(\text{PPh}_3)_2]$  (**9**).

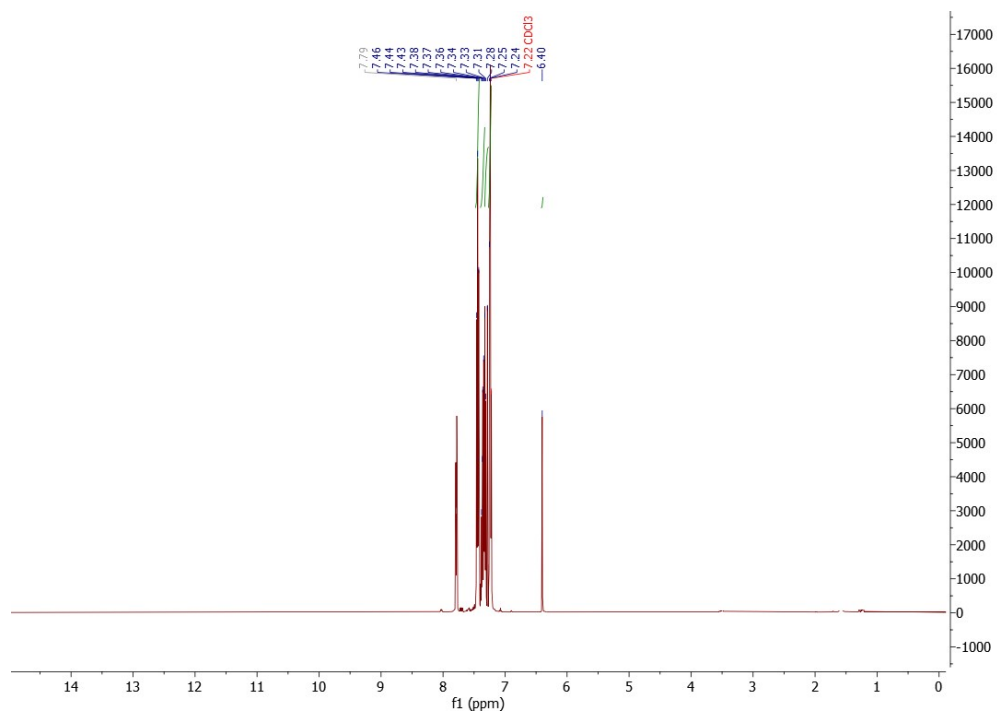

**Figure S47.**  $^1\text{H-NMR}$  spectrum of  $[\text{Cu}(\text{L}^{\text{Ph}})(\text{PPh}_3)_2]$  (**9**) in  $\text{CDCl}_3$ .

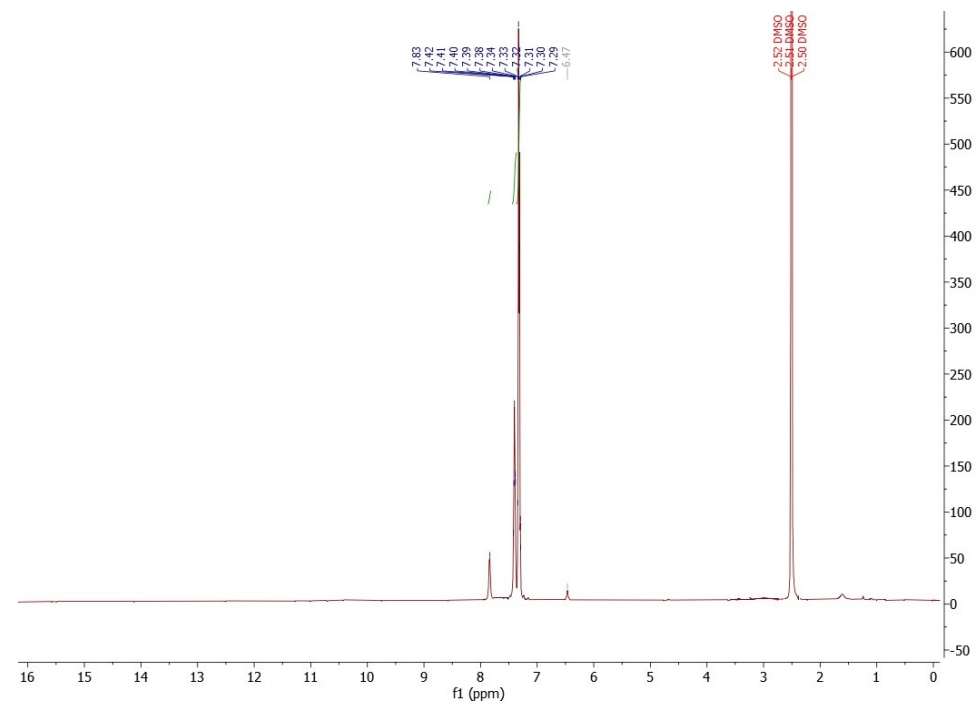

Figure S48.  $^1\text{H}$ -NMR spectrum of  $[\text{Cu}(\text{L}^{\text{Ph}})(\text{PPh}_3)_2]$  (**9**) in  $\text{DMSO-d}_6$ .

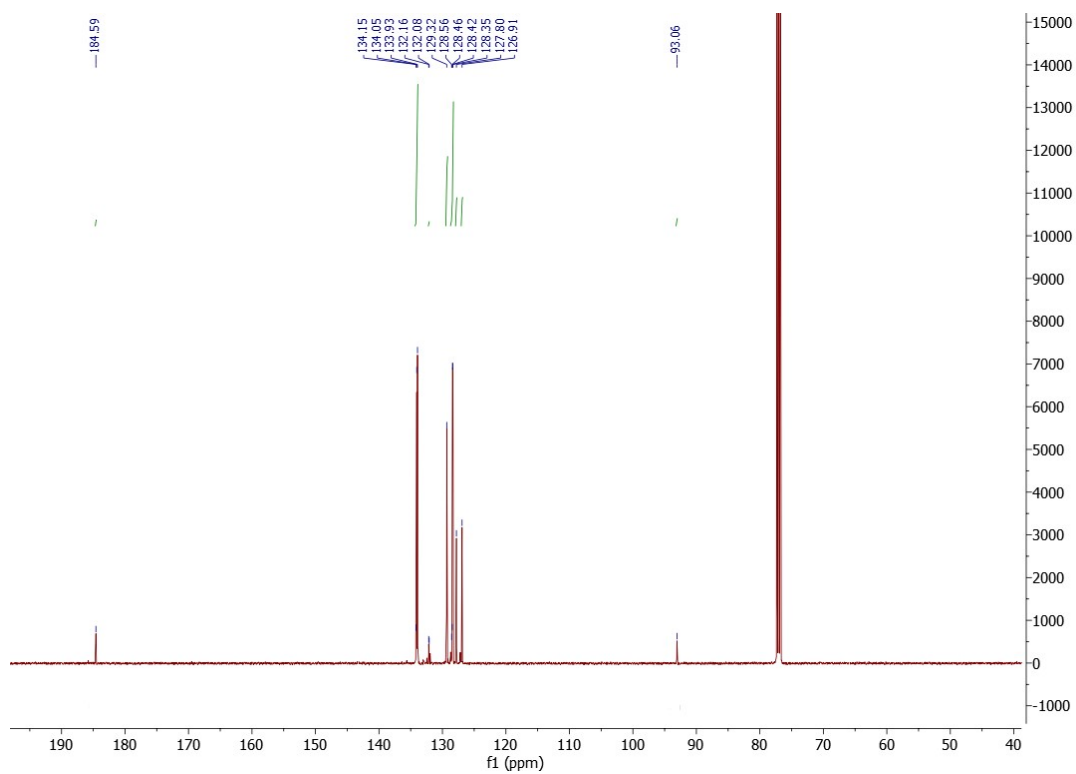

Figure S49.  $^{13}\text{C}\{^1\text{H}\}$ -NMR spectrum of  $[\text{Cu}(\text{L}^{\text{Ph}})(\text{PPh}_3)_2]$  (**9**) in  $\text{CDCl}_3$ .

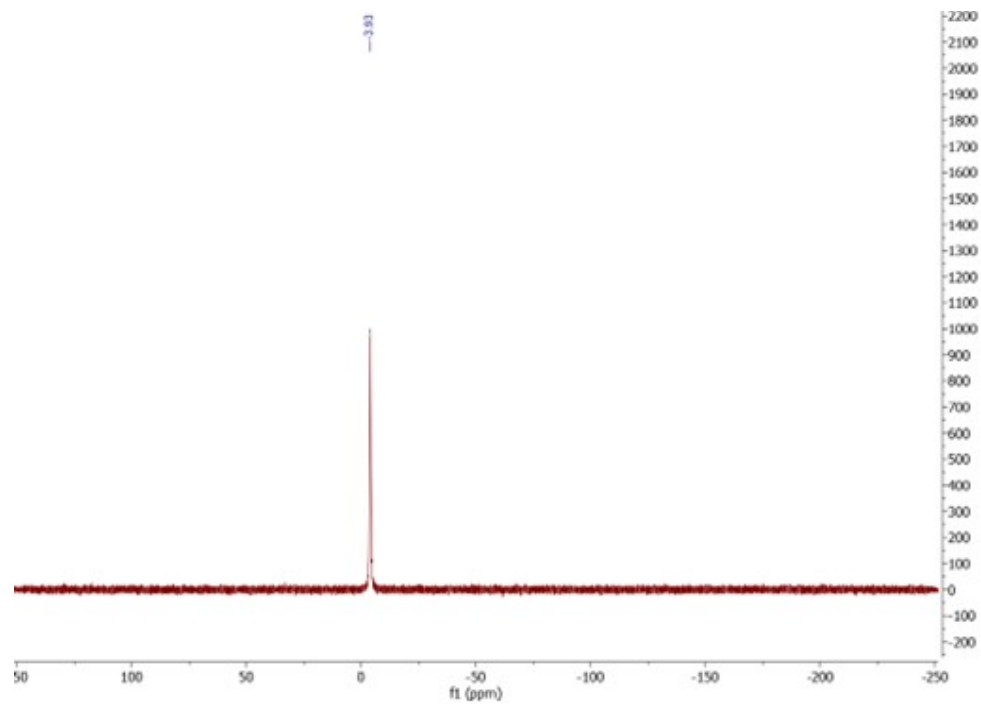

**Figure S50.**  $^{31}\text{P}\{^1\text{H}\}$ -NMR spectrum of  $[\text{Cu}(\text{L}^{\text{Ph}})(\text{PPh}_3)_2]$  (**9**) in  $\text{CDCl}_3$ .

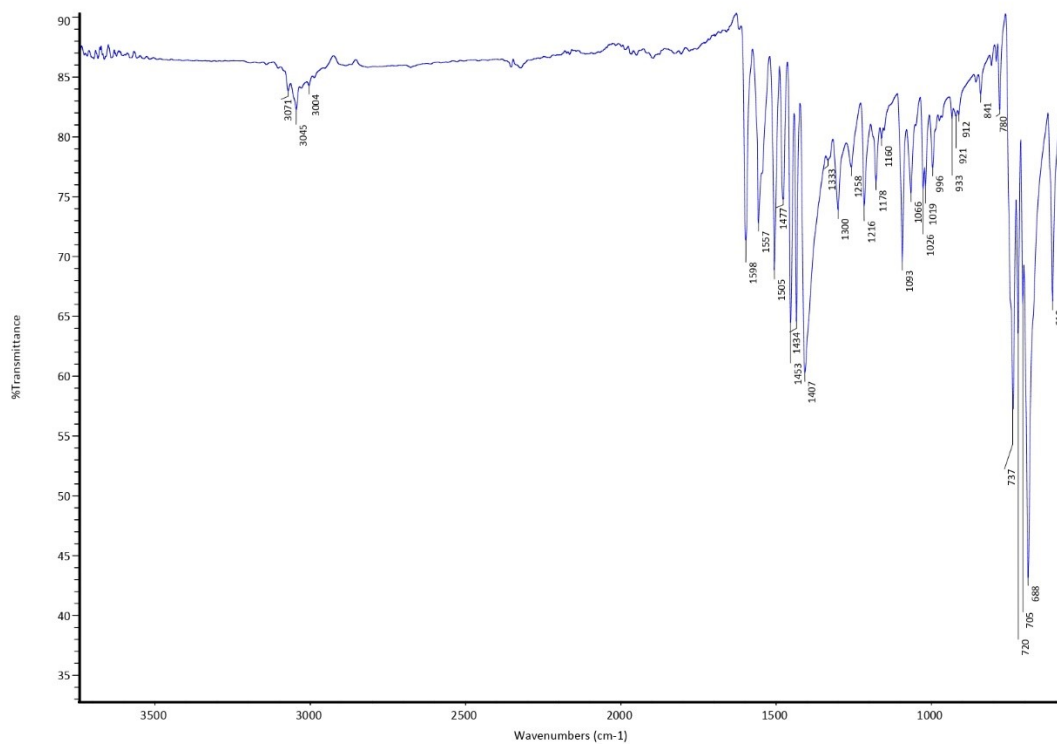

**Figure S51.** FT-IR spectrum of  $[\text{Ag}(\text{L}^{\text{Ph}})(\text{PPh}_3)_2]$  (**10**).

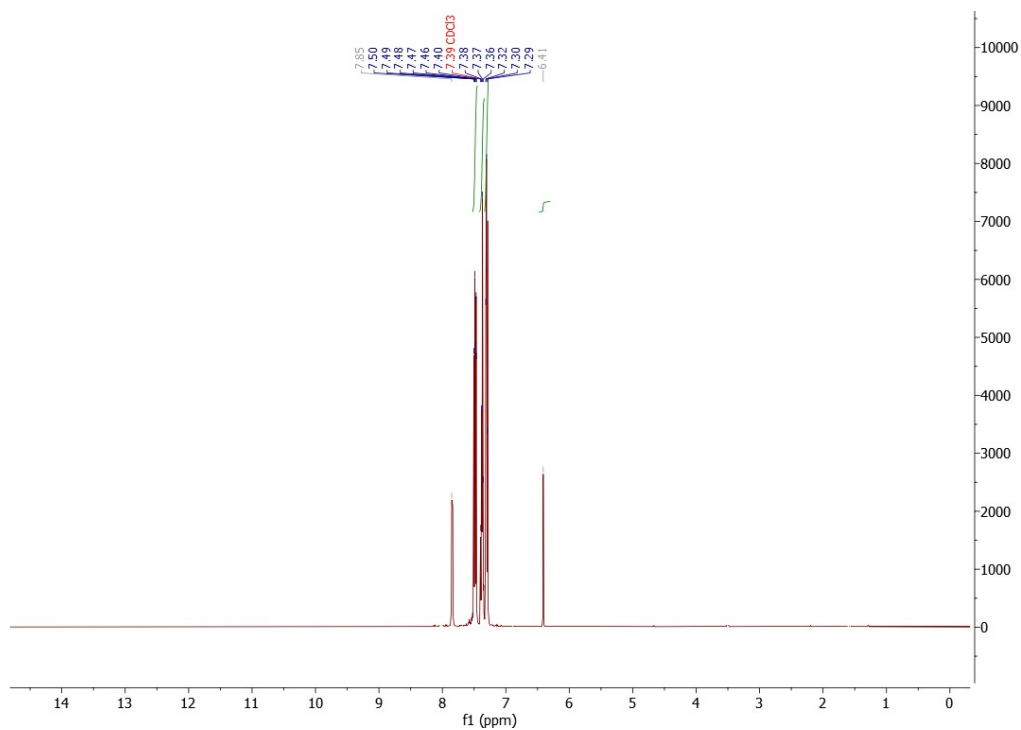

**Figure S52.**  $^1\text{H-NMR}$  spectrum of  $[\text{Ag}(\text{L}^{\text{Ph}})(\text{PPh}_3)_2]$  (**10**) in  $\text{CDCl}_3$ .

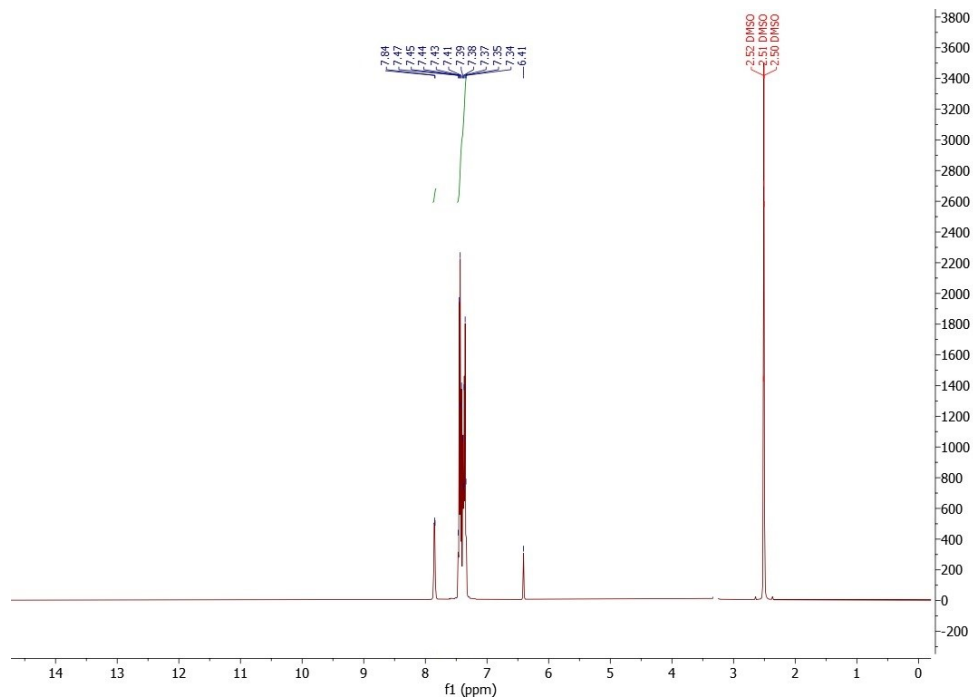

**Figure S53.**  $^1\text{H-NMR}$  spectrum of  $[\text{Ag}(\text{L}^{\text{Ph}})(\text{PPh}_3)_2]$  (**10**) in  $\text{DMSO-d}_6$ .

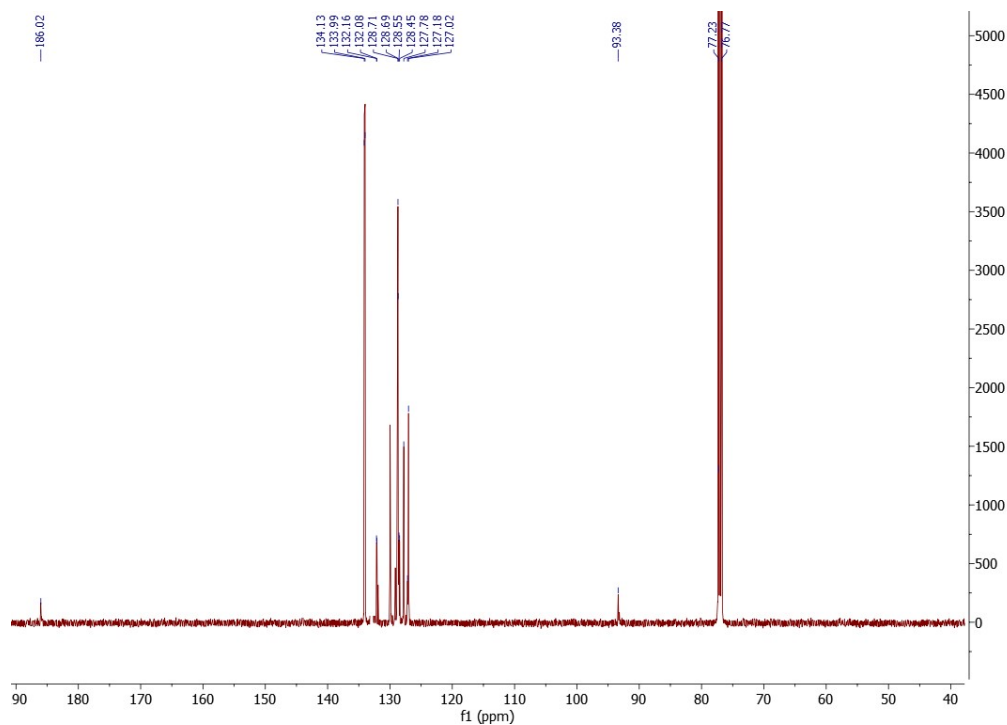

**Figure S54.**  $^{13}\text{C}\{^1\text{H}\}$ -NMR spectrum of  $[\text{Ag}(\text{L}^{\text{Ph}})(\text{PPh}_3)_2]$  (**10**) in  $\text{CDCl}_3$ .

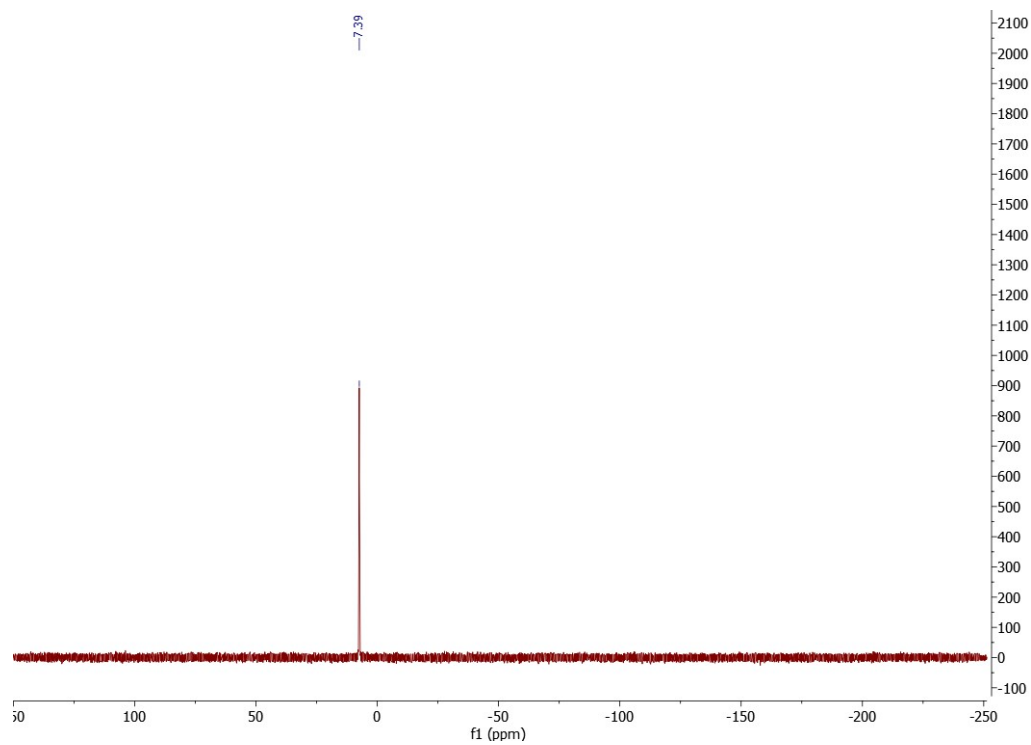

**Figure S55.**  $^{31}\text{P}\{^1\text{H}\}$ -NMR spectrum of  $[\text{Ag}(\text{L}^{\text{Ph}})(\text{PPh}_3)_2]$  (**10**) in  $\text{CDCl}_3$ .



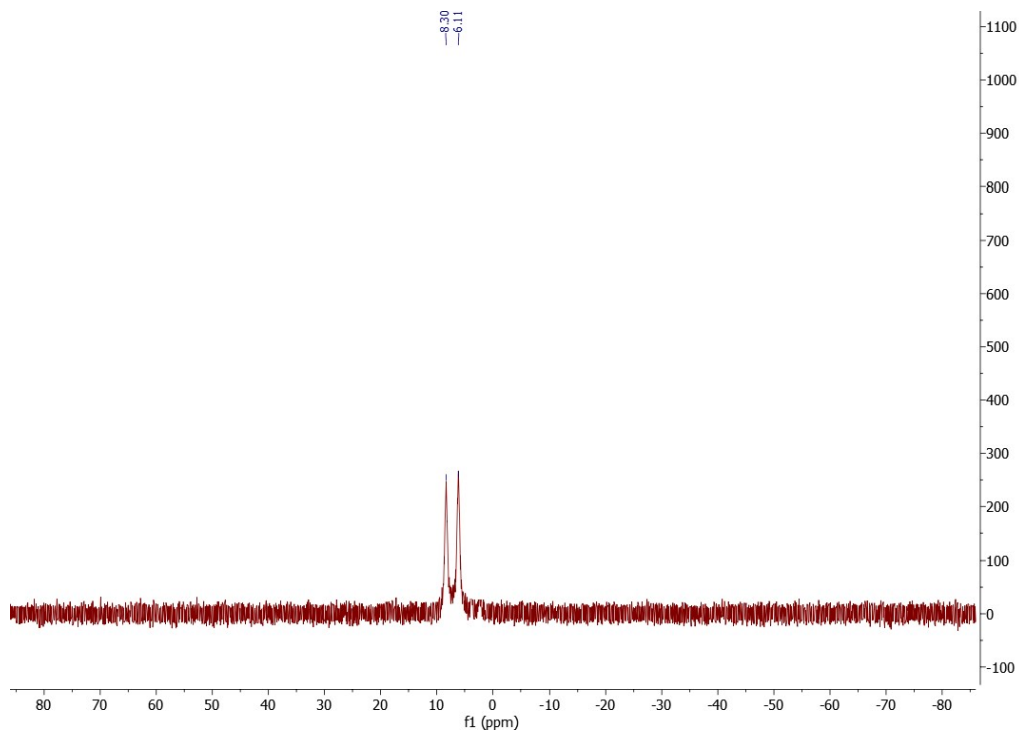

**Figure S56.**  $^{31}\text{P}\{^1\text{H}\}$ -NMR spectrum of  $[\text{Ag}(\text{L}^{\text{Ph}})(\text{PPh}_3)_2]$  (**10**) in  $\text{CDCl}_3$  at 223K.

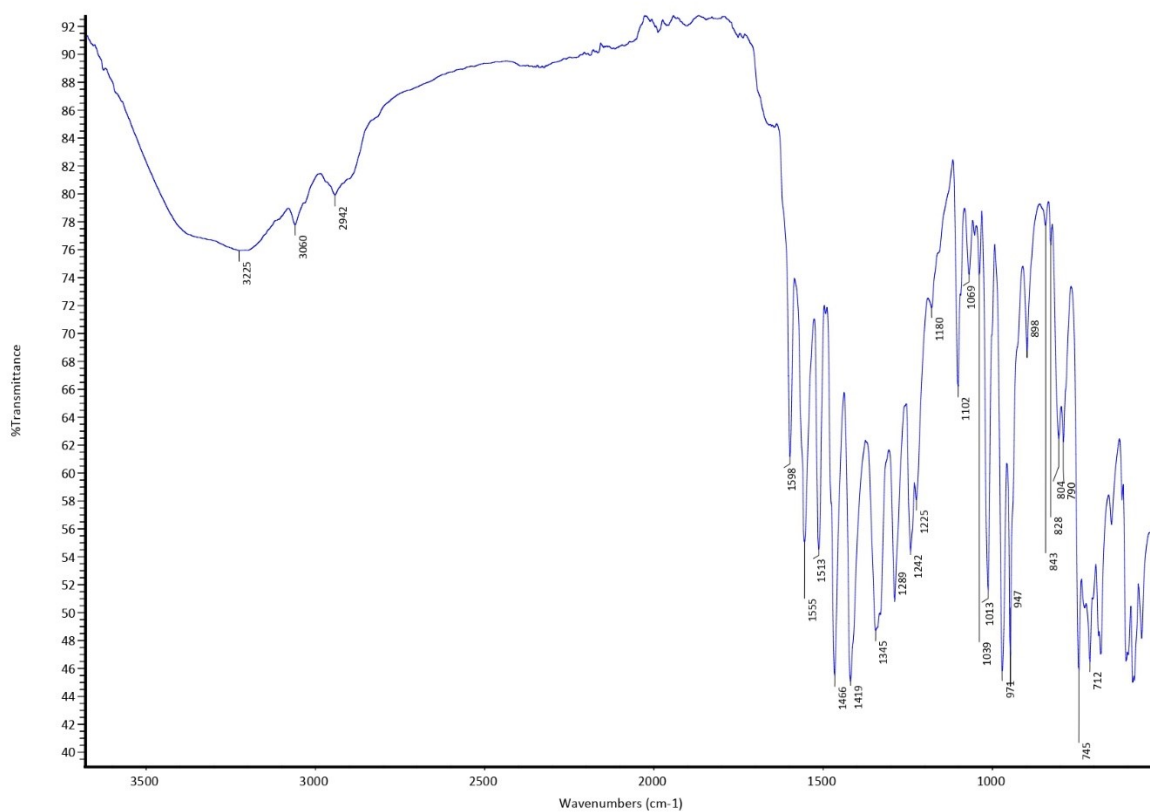

**Figure S57.** FT-IR spectrum of  $[\text{Ag}(\text{L}^{\text{Ph}})(\text{PTA})]\cdot\text{H}_2\text{O}$  (**11**).

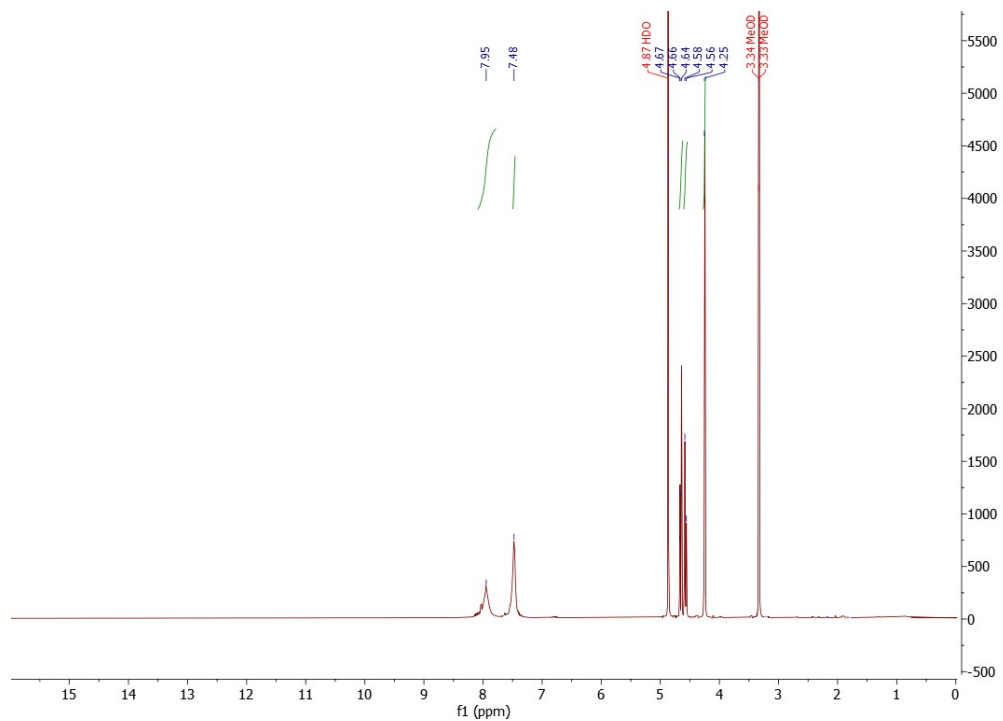

Figure S58. <sup>1</sup>H-NMR spectrum of [Ag(L<sup>Ph</sup>)(PTA)]·H<sub>2</sub>O (11) in CD<sub>3</sub>OD.

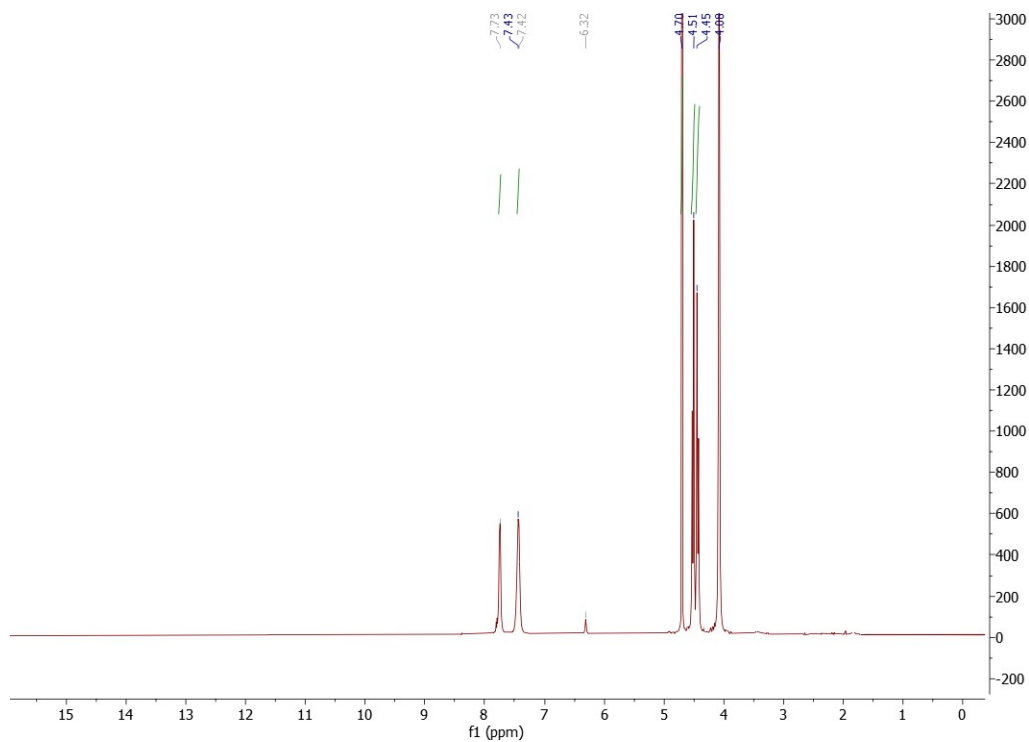

Figure S59. <sup>1</sup>H-NMR spectrum of [Ag(L<sup>Ph</sup>)(PTA)]·H<sub>2</sub>O (11) in D<sub>2</sub>O.

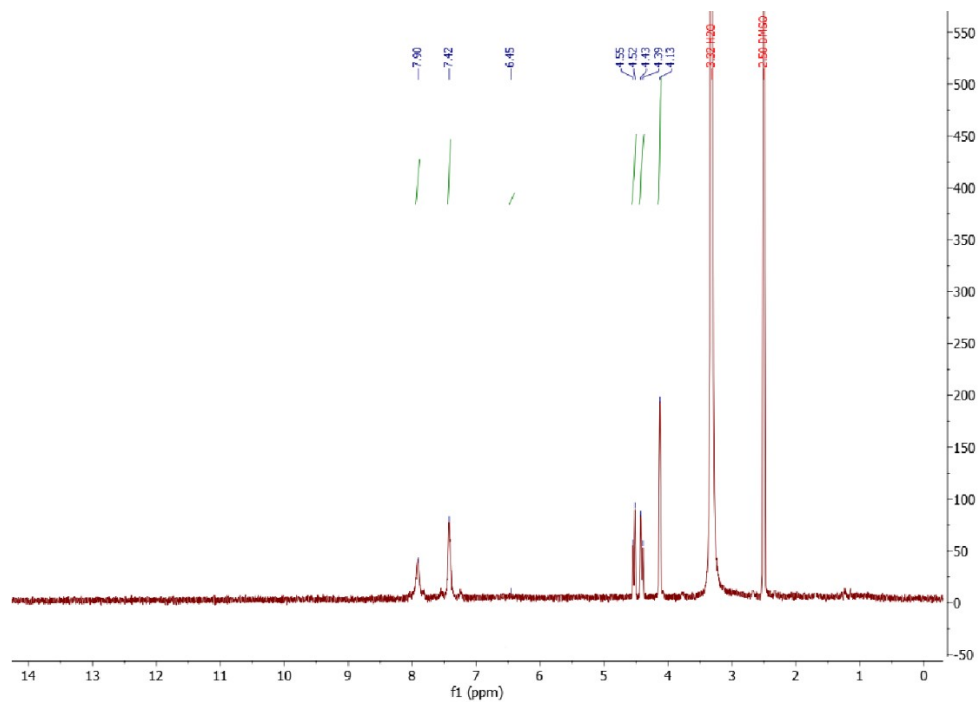

**Figure S60.**  $^1\text{H-NMR}$  spectrum of  $[\text{Ag}(\text{L}^{\text{Ph}})(\text{PTA})]\cdot\text{H}_2\text{O}$  (11) in  $\text{DMSO-d}_6$ .

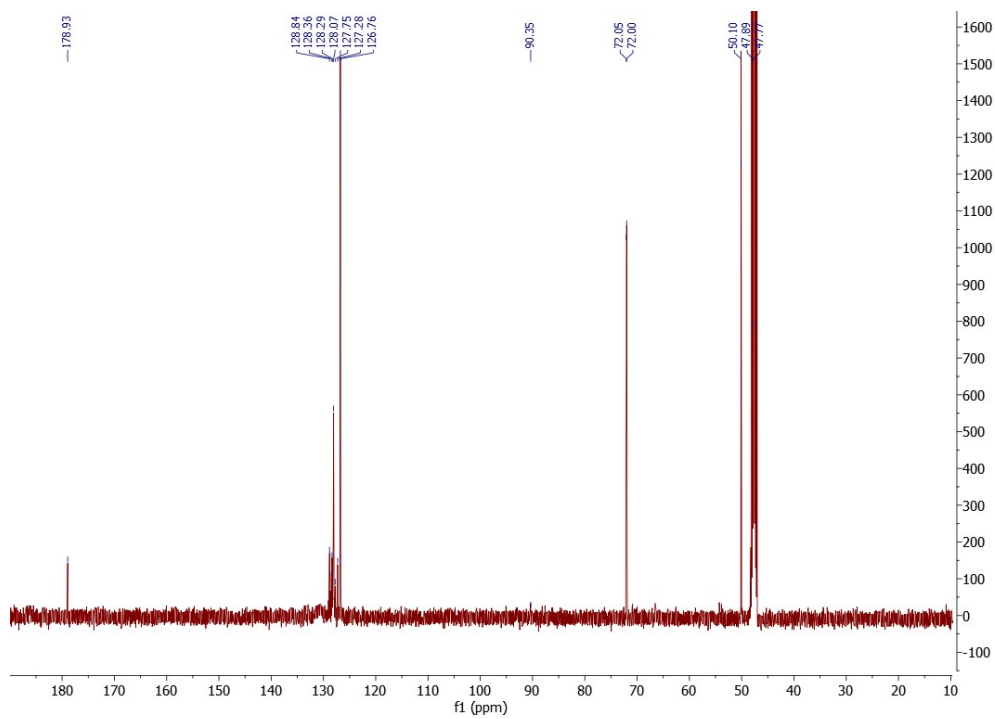

**Figure S61.**  $^{13}\text{C}\{^1\text{H}\}$ -NMR spectrum of  $[\text{Ag}(\text{L}^{\text{Ph}})(\text{PTA})]\cdot\text{H}_2\text{O}$  (11) in  $\text{CD}_3\text{OD}$ .

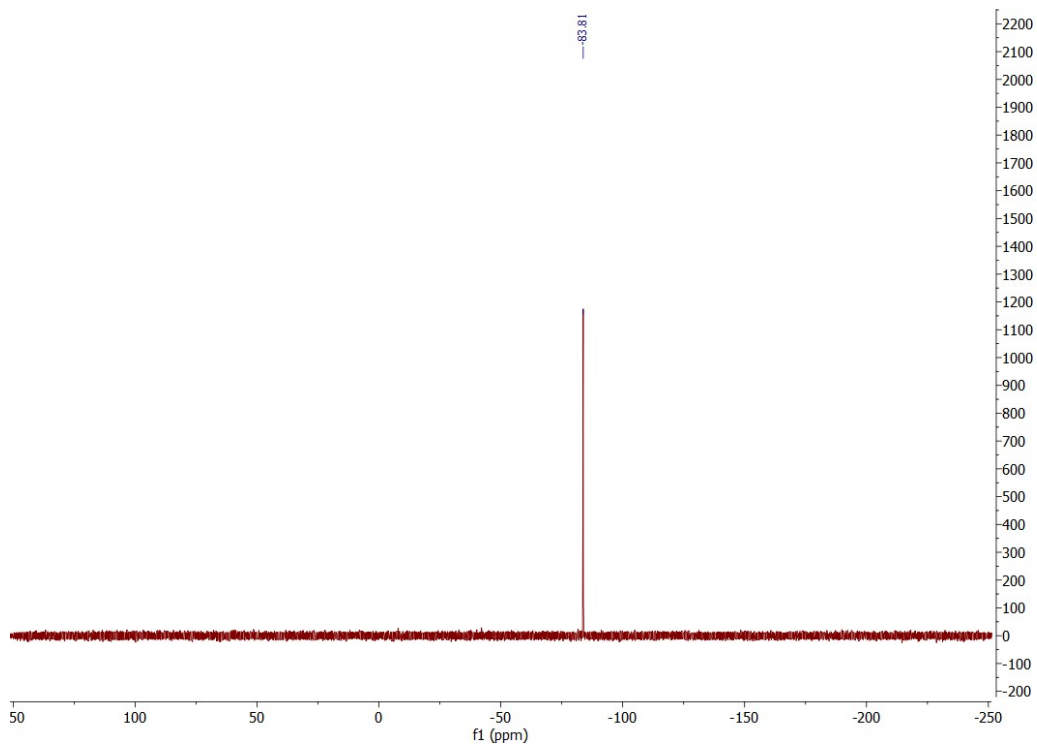

**Figure S62.**  $^{31}\text{P}\{^1\text{H}\}$ -NMR spectrum of  $[\text{Ag}(\text{L}^{\text{Ph}})(\text{PTA})]\cdot\text{H}_2\text{O}$  (**11**) in  $\text{CD}_3\text{OD}$ .

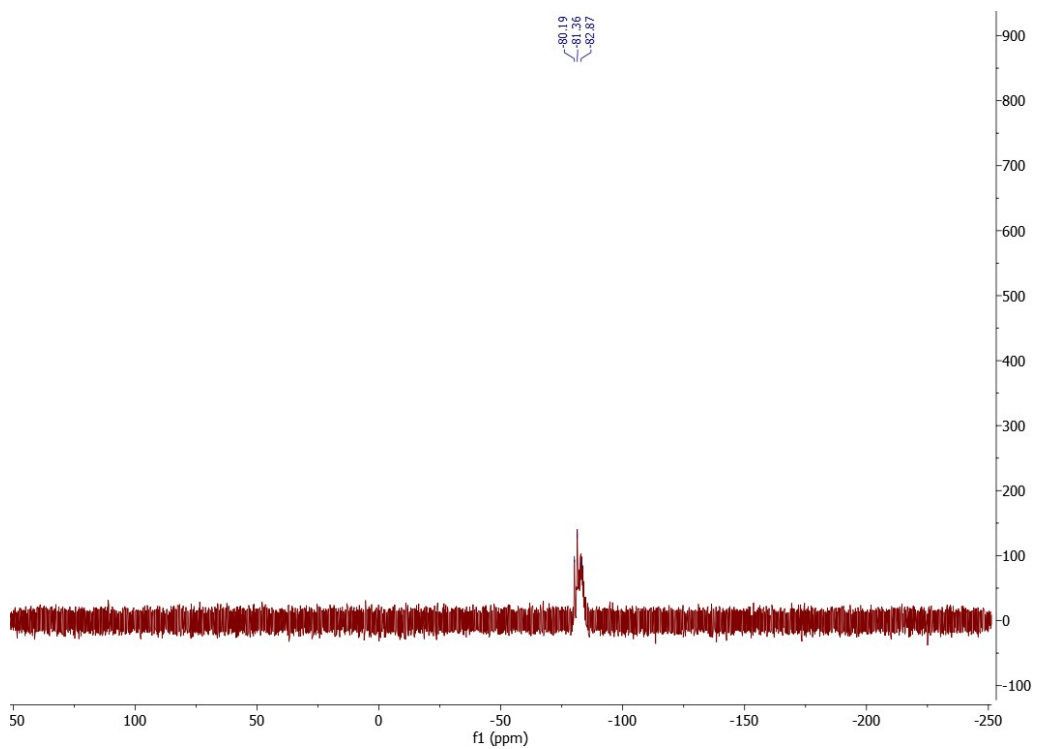

**Figure S63.**  $^{31}\text{P}\{^1\text{H}\}$ -NMR spectrum of  $[\text{Ag}(\text{L}^{\text{Ph}})(\text{PTA})]\cdot\text{H}_2\text{O}$  (**11**) in  $\text{CD}_3\text{OD}$  at 223 K.

**Table S1.** Crystal data and structure refinement for HL<sup>CF3</sup>.

|                                             |                                                               |
|---------------------------------------------|---------------------------------------------------------------|
| Identification code                         | dia99_0m                                                      |
| Empirical formula                           | C <sub>19</sub> H <sub>8</sub> F <sub>12</sub> O <sub>2</sub> |
| Formula weight                              | 496.25                                                        |
| Temperature/K                               | 99.96                                                         |
| Crystal system                              | monoclinic                                                    |
| Space group                                 | C2/c                                                          |
| a/Å                                         | 24.898(7)                                                     |
| b/Å                                         | 8.400(2)                                                      |
| c/Å                                         | 9.239(2)                                                      |
| α/°                                         | 90                                                            |
| β/°                                         | 110.682(4)                                                    |
| γ/°                                         | 90                                                            |
| Volume/Å <sup>3</sup>                       | 1807.8(8)                                                     |
| Z                                           | 4                                                             |
| ρ <sub>calc</sub> /g/cm <sup>3</sup>        | 1.823                                                         |
| μ/mm <sup>-1</sup>                          | 0.201                                                         |
| F(000)                                      | 984.0                                                         |
| Crystal size/mm <sup>3</sup>                | 0.42 × 0.12 × 0.07                                            |
| Radiation                                   | Mo Kα (λ = 0.71073)                                           |
| 2θ range for data collection/°              | 3.496 to 61.826                                               |
| Index ranges                                | -34 ≤ h ≤ 34, -8 ≤ k ≤ 12, -12 ≤ l ≤ 10                       |
| Reflections collected                       | 4933                                                          |
| Independent reflections                     | 2578 [R <sub>int</sub> = 0.0225, R <sub>sigma</sub> = 0.0374] |
| Data/restraints/parameters                  | 2578/87/179                                                   |
| Goodness-of-fit on F <sup>2</sup>           | 1.043                                                         |
| Final R indexes [I ≥ 2σ (I)]                | R <sub>1</sub> = 0.0474, wR <sub>2</sub> = 0.1225             |
| Final R indexes [all data]                  | R <sub>1</sub> = 0.0717, wR <sub>2</sub> = 0.1351             |
| Largest diff. peak/hole / e Å <sup>-3</sup> | 0.40/-0.35                                                    |

**Table S2.** Bond Lengths for HL<sup>CF3</sup>.

| <b>Atom</b> | <b>Atom</b>     | <b>Length/Å</b> | <b>Atom</b> | <b>Atom</b> | <b>Length/Å</b> |
|-------------|-----------------|-----------------|-------------|-------------|-----------------|
| F1          | C9              | 1.349(2)        | C3          | C8          | 1.403(2)        |
| F2          | C9              | 1.333(2)        | C4          | C5          | 1.398(2)        |
| F3          | C9              | 1.3313(19)      | C5          | C6          | 1.386(2)        |
| F4          | C10             | 1.267(7)        | C5          | C9          | 1.494(2)        |
| F5          | C10             | 1.377(5)        | C6          | C7          | 1.383(2)        |
| F6          | C10             | 1.336(5)        | C7          | C8          | 1.386(2)        |
| O1          | C2              | 1.286(2)        | C7          | C10         | 1.506(2)        |
| C1          | C2              | 1.4045(19)      | C10         | F6A         | 1.348(6)        |
| C1          | C2 <sup>1</sup> | 1.4045(19)      | C10         | F4A         | 1.367(6)        |
| C2          | C3              | 1.487(2)        | C10         | F5A         | 1.251(7)        |
| C3          | C4              | 1.384(2)        |             |             |                 |

<sup>1</sup>1-X,+Y,1/2-Z

**Table S3.** Bond Angles for HL<sup>CF3</sup>.

| <b>Atom</b>     | <b>Atom</b> | <b>Atom</b> | <b>Angle/°</b> | <b>Atom</b> | <b>Atom</b> | <b>Atom</b> | <b>Angle/°</b> |
|-----------------|-------------|-------------|----------------|-------------|-------------|-------------|----------------|
| C2 <sup>1</sup> | C1          | C2          | 119.6(2)       | F2          | C9          | F1          | 106.49(14)     |
| O1              | C2          | C1          | 121.46(15)     | F2          | C9          | C5          | 112.27(15)     |
| O1              | C2          | C3          | 116.58(13)     | F3          | C9          | F1          | 106.44(14)     |
| C1              | C2          | C3          | 121.96(16)     | F3          | C9          | F2          | 106.75(15)     |
| C4              | C3          | C2          | 122.05(13)     | F3          | C9          | C5          | 113.35(13)     |
| C4              | C3          | C8          | 119.41(14)     | F4          | C10         | F5          | 104.6(6)       |
| C8              | C3          | C2          | 118.54(15)     | F4          | C10         | F6          | 111.8(5)       |
| C3              | C4          | C5          | 120.31(14)     | F4          | C10         | C7          | 115.7(5)       |
| C4              | C5          | C9          | 118.33(14)     | F5          | C10         | C7          | 109.9(3)       |
| C6              | C5          | C4          | 120.34(16)     | F6          | C10         | F5          | 100.0(4)       |
| C6              | C5          | C9          | 121.32(14)     | F6          | C10         | C7          | 113.3(3)       |
| C7              | C6          | C5          | 119.09(14)     | F6A         | C10         | C7          | 111.3(3)       |
| C6              | C7          | C8          | 121.35(14)     | F6A         | C10         | F4A         | 99.7(7)        |
| C6              | C7          | C10         | 118.53(14)     | F4A         | C10         | C7          | 110.2(4)       |
| C8              | C7          | C10         | 120.11(15)     | F5A         | C10         | C7          | 115.5(4)       |
| C7              | C8          | C3          | 119.47(16)     | F5A         | C10         | F6A         | 111.1(4)       |
| F1              | C9          | C5          | 111.11(14)     | F5A         | C10         | F4A         | 107.8(6)       |

<sup>1</sup>1-X,+Y,1/2-Z

**Table S4.** Crystal data and structure refinement for [Cu(L<sup>CF3</sup>)(PPh<sub>3</sub>)<sub>2</sub>] (4).

|                                             |                                                                                 |
|---------------------------------------------|---------------------------------------------------------------------------------|
| Identification code                         | dia97_0m                                                                        |
| Empirical formula                           | C <sub>55</sub> H <sub>37</sub> CuF <sub>12</sub> O <sub>2</sub> P <sub>2</sub> |
| Formula weight                              | 1083.32                                                                         |
| Temperature/K                               | 100.00                                                                          |
| Crystal system                              | triclinic                                                                       |
| Space group                                 | P-1                                                                             |
| a/Å                                         | 13.5755(6)                                                                      |
| b/Å                                         | 19.2736(8)                                                                      |
| c/Å                                         | 20.1001(9)                                                                      |
| α/°                                         | 102.5570(10)                                                                    |
| β/°                                         | 94.3400(10)                                                                     |
| γ/°                                         | 97.1660(10)                                                                     |
| Volume/Å <sup>3</sup>                       | 5064.5(4)                                                                       |
| Z                                           | 4                                                                               |
| ρ <sub>calc</sub> /g/cm <sup>3</sup>        | 1.421                                                                           |
| μ/mm <sup>-1</sup>                          | 0.580                                                                           |
| F(000)                                      | 2200.0                                                                          |
| Crystal size/mm <sup>3</sup>                | 0.412 × 0.155 × 0.152                                                           |
| Radiation                                   | Mo Kα (λ = 0.71073)                                                             |
| 2θ range for data collection/°              | 3.04 to 58.26                                                                   |
| Index ranges                                | -18 ≤ h ≤ 18, -26 ≤ k ≤ 26, -27 ≤ l ≤ 27                                        |
| Reflections collected                       | 56923                                                                           |
| Independent reflections                     | 27098 [R <sub>int</sub> = 0.0285, R <sub>sigma</sub> = 0.0476]                  |
| Data/restraints/parameters                  | 27098/0/1297                                                                    |
| Goodness-of-fit on F <sup>2</sup>           | 1.053                                                                           |
| Final R indexes [I ≥ 2σ (I)]                | R <sub>1</sub> = 0.0414, wR <sub>2</sub> = 0.0974                               |
| Final R indexes [all data]                  | R <sub>1</sub> = 0.0606, wR <sub>2</sub> = 0.1061                               |
| Largest diff. peak/hole / e Å <sup>-3</sup> | 0.64/-0.72                                                                      |



**Table S5.** Bond Lengths for [Cu(L<sup>CF3</sup>)(PPh<sub>3</sub>)<sub>2</sub>] (**4**).

| <b>Atom</b> | <b>Atom</b> | <b>Length/Å</b> | <b>Atom</b> | <b>Atom</b> | <b>Length/Å</b> |
|-------------|-------------|-----------------|-------------|-------------|-----------------|
| Cu1         | P1          | 2.2266(5)       | Cu2         | P3          | 2.2250(5)       |
| Cu1         | P2          | 2.2309(5)       | Cu2         | P4          | 2.2198(5)       |
| Cu1         | O1          | 2.1042(13)      | Cu2         | O3          | 2.0774(12)      |
| Cu1         | O2          | 2.0335(13)      | Cu2         | O4          | 2.0705(12)      |
| P1          | C20         | 1.8211(19)      | P3          | C74         | 1.8192(18)      |
| P1          | C26         | 1.8252(19)      | P3          | C80         | 1.8271(19)      |
| P1          | C32         | 1.8228(19)      | P3          | C86         | 1.8252(19)      |
| P2          | C38         | 1.8192(18)      | P4          | C92         | 1.8309(18)      |
| P2          | C44         | 1.8243(19)      | P4          | C98         | 1.8215(18)      |
| P2          | C50         | 1.8283(18)      | P4          | C104        | 1.8273(18)      |
| F1          | C10         | 1.285(4)        | F13         | C65         | 1.314(3)        |
| F2          | C10         | 1.329(4)        | F14         | C65         | 1.321(3)        |
| F3          | C10         | 1.341(4)        | F15         | C65         | 1.327(3)        |
| F4          | C11         | 1.334(3)        | F16         | C66         | 1.324(3)        |
| F5          | C11         | 1.346(3)        | F17         | C66         | 1.330(2)        |
| F6          | C11         | 1.325(4)        | F18         | C66         | 1.344(3)        |
| F7          | C18         | 1.321(3)        | F19         | C72         | 1.337(3)        |
| F8          | C18         | 1.332(3)        | F20         | C72         | 1.324(3)        |
| F9          | C18         | 1.336(3)        | F21         | C72         | 1.321(3)        |
| F10         | C19         | 1.312(3)        | F22         | C73         | 1.332(2)        |
| F11         | C19         | 1.326(3)        | F23         | C73         | 1.330(3)        |
| F12         | C19         | 1.331(4)        | F24         | C73         | 1.321(3)        |
| O1          | C1          | 1.254(2)        | O3          | C56         | 1.264(2)        |
| O2          | C3          | 1.258(2)        | O4          | C58         | 1.258(2)        |
| C1          | C2          | 1.403(3)        | C01D        | C70         | 1.387(3)        |
| C1          | C4          | 1.513(3)        | C01D        | C71         | 1.388(3)        |
| C2          | C3          | 1.405(3)        | C01D        | C73         | 1.495(3)        |
| C3          | C12         | 1.511(3)        | C56         | C57         | 1.399(2)        |
| C4          | C5          | 1.386(3)        | C56         | C59         | 1.508(2)        |
| C4          | C9          | 1.393(3)        | C57         | C58         | 1.410(2)        |
| C5          | C6          | 1.389(3)        | C58         | C67         | 1.510(2)        |
| C6          | C7          | 1.375(4)        | C59         | C60         | 1.397(2)        |
| C6          | C10         | 1.496(4)        | C59         | C64         | 1.385(2)        |
| C7          | C8          | 1.384(4)        | C60         | C61         | 1.382(3)        |
| C8          | C9          | 1.394(3)        | C61         | C62         | 1.388(3)        |
| C8          | C11         | 1.487(4)        | C61         | C65         | 1.499(3)        |
| C12         | C13         | 1.396(3)        | C62         | C63         | 1.387(3)        |
| C12         | C17         | 1.388(3)        | C63         | C64         | 1.394(3)        |
| C13         | C14         | 1.393(3)        | C63         | C66         | 1.492(3)        |
| C14         | C15         | 1.383(3)        | C67         | C68         | 1.393(2)        |

**Table S5.** Bond Lengths for [Cu(L<sup>CF3</sup>)(PPh<sub>3</sub>)<sub>2</sub>] (**4**).

| <b>Atom</b> | <b>Atom</b> | <b>Length/Å</b> | <b>Atom</b> | <b>Atom</b> | <b>Length/Å</b> |
|-------------|-------------|-----------------|-------------|-------------|-----------------|
| C14         | C18         | 1.503(3)        | C67         | C71         | 1.390(2)        |
| C15         | C16         | 1.382(3)        | C68         | C69         | 1.386(3)        |
| C16         | C17         | 1.386(3)        | C69         | C70         | 1.388(3)        |
| C16         | C19         | 1.494(3)        | C69         | C72         | 1.500(3)        |
| C20         | C21         | 1.392(3)        | C74         | C75         | 1.395(3)        |
| C20         | C25         | 1.395(3)        | C74         | C79         | 1.392(3)        |
| C21         | C22         | 1.382(3)        | C75         | C76         | 1.387(3)        |
| C22         | C23         | 1.379(3)        | C76         | C77         | 1.380(3)        |
| C23         | C24         | 1.386(3)        | C77         | C78         | 1.381(3)        |
| C24         | C25         | 1.383(3)        | C78         | C79         | 1.392(3)        |
| C26         | C27         | 1.388(3)        | C80         | C81         | 1.397(3)        |
| C26         | C31         | 1.399(3)        | C80         | C85         | 1.388(3)        |
| C27         | C28         | 1.384(3)        | C81         | C82         | 1.388(3)        |
| C28         | C29         | 1.381(3)        | C82         | C83         | 1.378(3)        |
| C29         | C30         | 1.378(3)        | C83         | C84         | 1.374(3)        |
| C30         | C31         | 1.389(3)        | C84         | C85         | 1.389(3)        |
| C32         | C33         | 1.391(3)        | C86         | C87         | 1.396(3)        |
| C32         | C37         | 1.401(3)        | C86         | C91         | 1.397(2)        |
| C33         | C34         | 1.395(3)        | C87         | C88         | 1.389(3)        |
| C34         | C35         | 1.377(3)        | C88         | C89         | 1.385(3)        |
| C35         | C36         | 1.391(3)        | C89         | C90         | 1.385(3)        |
| C36         | C37         | 1.382(3)        | C90         | C91         | 1.389(3)        |
| C38         | C39         | 1.397(3)        | C92         | C93         | 1.389(2)        |
| C38         | C43         | 1.395(3)        | C92         | C97         | 1.396(3)        |
| C39         | C40         | 1.384(3)        | C93         | C94         | 1.393(3)        |
| C40         | C41         | 1.385(3)        | C94         | C95         | 1.387(3)        |
| C41         | C42         | 1.381(3)        | C95         | C96         | 1.387(3)        |
| C42         | C43         | 1.393(3)        | C96         | C97         | 1.388(3)        |
| C44         | C45         | 1.390(3)        | C98         | C99         | 1.392(2)        |
| C44         | C49         | 1.395(3)        | C98         | C103        | 1.394(2)        |
| C45         | C46         | 1.389(3)        | C99         | C100        | 1.389(3)        |
| C46         | C47         | 1.379(3)        | C100        | C101        | 1.382(3)        |
| C47         | C48         | 1.385(3)        | C101        | C102        | 1.386(3)        |
| C48         | C49         | 1.389(3)        | C102        | C103        | 1.389(3)        |
| C50         | C51         | 1.390(3)        | C104        | C105        | 1.399(2)        |
| C50         | C55         | 1.391(3)        | C104        | C109        | 1.394(3)        |
| C51         | C52         | 1.388(3)        | C105        | C106        | 1.387(3)        |
| C52         | C53         | 1.378(3)        | C106        | C107        | 1.385(3)        |
| C53         | C54         | 1.389(3)        | C107        | C108        | 1.386(3)        |
| C54         | C55         | 1.387(3)        | C108        | C109        | 1.389(3)        |



**Table S6.** Bond Angles for [Cu(L<sup>CF3</sup>)(PPh<sub>3</sub>)<sub>2</sub>] (**4**).

| Atom | Atom | Atom | Angle/°    | Atom | Atom | Atom | Angle/°     |
|------|------|------|------------|------|------|------|-------------|
| P1   | Cu1  | P2   | 129.02(2)  | P4   | Cu2  | P3   | 128.009(19) |
| O1   | Cu1  | P1   | 100.28(4)  | O3   | Cu2  | P3   | 119.12(4)   |
| O1   | Cu1  | P2   | 106.77(4)  | O3   | Cu2  | P4   | 94.19(4)    |
| O2   | Cu1  | P1   | 113.60(4)  | O4   | Cu2  | P3   | 97.20(4)    |
| O2   | Cu1  | P2   | 109.90(4)  | O4   | Cu2  | P4   | 124.30(4)   |
| O2   | Cu1  | O1   | 87.76(5)   | O4   | Cu2  | O3   | 88.37(5)    |
| C20  | P1   | Cu1  | 113.73(6)  | C74  | P3   | Cu2  | 109.50(6)   |
| C20  | P1   | C26  | 104.15(9)  | C74  | P3   | C80  | 102.20(8)   |
| C20  | P1   | C32  | 102.99(8)  | C74  | P3   | C86  | 105.10(8)   |
| C26  | P1   | Cu1  | 110.99(6)  | C80  | P3   | Cu2  | 110.92(6)   |
| C32  | P1   | Cu1  | 118.66(6)  | C86  | P3   | Cu2  | 122.60(6)   |
| C32  | P1   | C26  | 104.93(8)  | C86  | P3   | C80  | 104.52(8)   |
| C38  | P2   | Cu1  | 108.12(6)  | C92  | P4   | Cu2  | 107.92(6)   |
| C38  | P2   | C44  | 103.12(8)  | C98  | P4   | Cu2  | 121.55(6)   |
| C38  | P2   | C50  | 105.36(8)  | C98  | P4   | C92  | 103.20(8)   |
| C44  | P2   | Cu1  | 122.26(6)  | C98  | P4   | C104 | 106.31(8)   |
| C44  | P2   | C50  | 104.30(8)  | C104 | P4   | Cu2  | 113.47(6)   |
| C50  | P2   | Cu1  | 112.20(6)  | C104 | P4   | C92  | 102.25(8)   |
| C1   | O1   | Cu1  | 126.02(12) | C56  | O3   | Cu2  | 125.04(11)  |
| C3   | O2   | Cu1  | 127.98(12) | C58  | O4   | Cu2  | 126.23(11)  |
| O1   | C1   | C2   | 126.63(18) | C70  | C01D | C71  | 120.84(18)  |
| O1   | C1   | C4   | 115.34(17) | C70  | C01D | C73  | 118.70(18)  |
| C2   | C1   | C4   | 118.00(18) | C71  | C01D | C73  | 120.45(18)  |
| C1   | C2   | C3   | 124.58(18) | O3   | C56  | C57  | 126.61(16)  |
| O2   | C3   | C2   | 126.30(17) | O3   | C56  | C59  | 114.04(15)  |
| O2   | C3   | C12  | 114.68(16) | C57  | C56  | C59  | 119.34(15)  |
| C2   | C3   | C12  | 119.02(17) | C56  | C57  | C58  | 124.35(16)  |
| C5   | C4   | C1   | 118.15(19) | O4   | C58  | C57  | 126.46(16)  |
| C5   | C4   | C9   | 119.3(2)   | O4   | C58  | C67  | 115.46(15)  |
| C9   | C4   | C1   | 122.56(19) | C57  | C58  | C67  | 118.00(15)  |
| C4   | C5   | C6   | 119.9(2)   | C60  | C59  | C56  | 117.18(16)  |
| C5   | C6   | C10  | 120.3(3)   | C64  | C59  | C56  | 123.53(16)  |
| C7   | C6   | C5   | 121.0(2)   | C64  | C59  | C60  | 119.20(16)  |
| C7   | C6   | C10  | 118.7(2)   | C61  | C60  | C59  | 120.34(17)  |
| C6   | C7   | C8   | 119.5(2)   | C60  | C61  | C62  | 120.72(17)  |
| C7   | C8   | C9   | 120.2(2)   | C60  | C61  | C65  | 119.47(18)  |
| C7   | C8   | C11  | 118.9(2)   | C62  | C61  | C65  | 119.81(17)  |
| C9   | C8   | C11  | 120.9(3)   | C63  | C62  | C61  | 118.94(17)  |
| C4   | C9   | C8   | 120.2(2)   | C62  | C63  | C64  | 120.73(18)  |
| F1   | C10  | F2   | 107.7(4)   | C62  | C63  | C66  | 119.77(18)  |

**Table S6.** Bond Angles for [Cu(L<sup>CF3</sup>)(PPh<sub>3</sub>)<sub>2</sub>] (**4**).

| Atom | Atom | Atom | Angle/°    | Atom | Atom | Atom | Angle/°    |
|------|------|------|------------|------|------|------|------------|
| F1   | C10  | F3   | 108.5(3)   | C64  | C63  | C66  | 119.41(18) |
| F1   | C10  | C6   | 114.2(2)   | C59  | C64  | C63  | 120.07(17) |
| F2   | C10  | F3   | 102.7(2)   | F13  | C65  | F14  | 106.02(19) |
| F2   | C10  | C6   | 111.9(3)   | F13  | C65  | F15  | 107.7(2)   |
| F3   | C10  | C6   | 111.1(3)   | F13  | C65  | C61  | 112.7(2)   |
| F4   | C11  | F5   | 105.6(2)   | F14  | C65  | F15  | 104.7(2)   |
| F4   | C11  | C8   | 112.4(2)   | F14  | C65  | C61  | 113.30(17) |
| F5   | C11  | C8   | 111.5(3)   | F15  | C65  | C61  | 111.95(18) |
| F6   | C11  | F4   | 107.4(3)   | F16  | C66  | F17  | 106.85(18) |
| F6   | C11  | F5   | 105.9(3)   | F16  | C66  | F18  | 105.55(19) |
| F6   | C11  | C8   | 113.5(2)   | F16  | C66  | C63  | 112.75(18) |
| C13  | C12  | C3   | 124.25(18) | F17  | C66  | F18  | 105.71(18) |
| C17  | C12  | C3   | 117.17(17) | F17  | C66  | C63  | 113.00(18) |
| C17  | C12  | C13  | 118.55(18) | F18  | C66  | C63  | 112.39(18) |
| C14  | C13  | C12  | 120.0(2)   | C68  | C67  | C58  | 117.77(16) |
| C13  | C14  | C18  | 119.2(2)   | C71  | C67  | C58  | 123.06(16) |
| C15  | C14  | C13  | 121.1(2)   | C71  | C67  | C68  | 119.11(16) |
| C15  | C14  | C18  | 119.6(2)   | C69  | C68  | C67  | 120.23(17) |
| C16  | C15  | C14  | 118.8(2)   | C68  | C69  | C70  | 120.80(18) |
| C15  | C16  | C17  | 120.7(2)   | C68  | C69  | C72  | 120.07(18) |
| C15  | C16  | C19  | 120.6(2)   | C70  | C69  | C72  | 119.08(18) |
| C17  | C16  | C19  | 118.6(2)   | C01D | C70  | C69  | 118.81(18) |
| C16  | C17  | C12  | 120.9(2)   | C01D | C71  | C67  | 120.21(18) |
| F7   | C18  | F8   | 107.0(2)   | F19  | C72  | C69  | 111.54(19) |
| F7   | C18  | F9   | 106.0(2)   | F20  | C72  | F19  | 106.28(19) |
| F7   | C18  | C14  | 111.8(2)   | F20  | C72  | C69  | 112.24(19) |
| F8   | C18  | F9   | 106.9(2)   | F21  | C72  | F19  | 105.5(2)   |
| F8   | C18  | C14  | 112.8(2)   | F21  | C72  | F20  | 107.9(2)   |
| F9   | C18  | C14  | 112.0(2)   | F21  | C72  | C69  | 112.90(18) |
| F10  | C19  | F11  | 106.4(2)   | F22  | C73  | C01D | 112.00(18) |
| F10  | C19  | F12  | 105.9(2)   | F23  | C73  | F22  | 105.77(19) |
| F10  | C19  | C16  | 113.4(2)   | F23  | C73  | C01D | 113.18(17) |
| F11  | C19  | F12  | 105.8(2)   | F24  | C73  | F22  | 105.82(19) |
| F11  | C19  | C16  | 113.1(2)   | F24  | C73  | F23  | 107.2(2)   |
| F12  | C19  | C16  | 111.7(3)   | F24  | C73  | C01D | 112.36(19) |
| C21  | C20  | P1   | 117.08(14) | C75  | C74  | P3   | 117.28(13) |
| C21  | C20  | C25  | 119.12(18) | C79  | C74  | P3   | 123.52(14) |
| C25  | C20  | P1   | 123.80(15) | C79  | C74  | C75  | 119.12(17) |
| C22  | C21  | C20  | 120.40(19) | C76  | C75  | C74  | 120.53(18) |
| C23  | C22  | C21  | 120.3(2)   | C77  | C76  | C75  | 119.70(19) |

**Table S6.** Bond Angles for [Cu(L<sup>CF3</sup>)(PPh<sub>3</sub>)<sub>2</sub>] (**4**).

| <b>Atom</b> | <b>Atom</b> | <b>Atom</b> | <b>Angle/°</b> | <b>Atom</b> | <b>Atom</b> | <b>Atom</b> | <b>Angle/°</b> |
|-------------|-------------|-------------|----------------|-------------|-------------|-------------|----------------|
| C22         | C23         | C24         | 119.7(2)       | C76         | C77         | C78         | 120.59(19)     |
| C25         | C24         | C23         | 120.4(2)       | C77         | C78         | C79         | 119.87(19)     |
| C24         | C25         | C20         | 120.03(19)     | C74         | C79         | C78         | 120.16(19)     |
| C27         | C26         | P1          | 122.60(15)     | C81         | C80         | P3          | 117.44(14)     |
| C27         | C26         | C31         | 119.08(17)     | C85         | C80         | P3          | 123.50(15)     |
| C31         | C26         | P1          | 118.30(14)     | C85         | C80         | C81         | 119.03(18)     |
| C28         | C27         | C26         | 120.4(2)       | C82         | C81         | C80         | 120.3(2)       |
| C29         | C28         | C27         | 120.1(2)       | C83         | C82         | C81         | 119.9(2)       |
| C30         | C29         | C28         | 120.38(19)     | C84         | C83         | C82         | 120.1(2)       |
| C29         | C30         | C31         | 119.9(2)       | C83         | C84         | C85         | 120.6(2)       |
| C30         | C31         | C26         | 120.18(19)     | C80         | C85         | C84         | 120.0(2)       |
| C33         | C32         | P1          | 123.40(14)     | C87         | C86         | P3          | 122.93(14)     |
| C33         | C32         | C37         | 118.96(17)     | C87         | C86         | C91         | 118.98(17)     |
| C37         | C32         | P1          | 117.50(14)     | C91         | C86         | P3          | 118.08(14)     |
| C32         | C33         | C34         | 120.10(18)     | C88         | C87         | C86         | 120.09(18)     |
| C35         | C34         | C33         | 120.53(19)     | C89         | C88         | C87         | 120.61(18)     |
| C34         | C35         | C36         | 119.73(18)     | C90         | C89         | C88         | 119.61(19)     |
| C37         | C36         | C35         | 120.20(18)     | C89         | C90         | C91         | 120.30(18)     |
| C36         | C37         | C32         | 120.49(18)     | C90         | C91         | C86         | 120.37(18)     |
| C39         | C38         | P2          | 117.91(14)     | C93         | C92         | P4          | 123.55(14)     |
| C43         | C38         | P2          | 122.67(14)     | C93         | C92         | C97         | 119.13(17)     |
| C43         | C38         | C39         | 118.80(17)     | C97         | C92         | P4          | 117.29(13)     |
| C40         | C39         | C38         | 120.73(18)     | C92         | C93         | C94         | 120.38(18)     |
| C39         | C40         | C41         | 120.03(19)     | C95         | C94         | C93         | 120.04(18)     |
| C42         | C41         | C40         | 119.96(19)     | C96         | C95         | C94         | 119.95(18)     |
| C41         | C42         | C43         | 120.35(18)     | C95         | C96         | C97         | 119.97(18)     |
| C42         | C43         | C38         | 120.11(18)     | C96         | C97         | C92         | 120.49(18)     |
| C45         | C44         | P2          | 118.97(15)     | C99         | C98         | P4          | 117.53(13)     |
| C45         | C44         | C49         | 118.82(18)     | C99         | C98         | C103        | 119.20(16)     |
| C49         | C44         | P2          | 122.17(15)     | C103        | C98         | P4          | 123.17(13)     |
| C46         | C45         | C44         | 120.58(19)     | C100        | C99         | C98         | 120.37(17)     |
| C47         | C46         | C45         | 120.3(2)       | C101        | C100        | C99         | 119.84(18)     |
| C46         | C47         | C48         | 119.64(19)     | C100        | C101        | C102        | 120.47(17)     |
| C47         | C48         | C49         | 120.33(19)     | C101        | C102        | C103        | 119.71(17)     |
| C48         | C49         | C44         | 120.29(19)     | C102        | C103        | C98         | 120.38(17)     |
| C51         | C50         | P2          | 124.15(15)     | C105        | C104        | P4          | 122.89(14)     |
| C51         | C50         | C55         | 119.06(17)     | C109        | C104        | P4          | 118.02(14)     |
| C55         | C50         | P2          | 116.73(14)     | C109        | C104        | C105        | 118.98(16)     |
| C52         | C51         | C50         | 120.12(19)     | C106        | C105        | C104        | 120.48(18)     |
| C53         | C52         | C51         | 120.54(19)     | C107        | C106        | C105        | 119.99(19)     |

**Table S6.** Bond Angles for [Cu(L<sup>CF3</sup>)(PPh<sub>3</sub>)<sub>2</sub>] (**4**).

| <b>Atom</b> | <b>Atom</b> | <b>Atom</b> | <b>Angle/°</b> | <b>Atom</b> | <b>Atom</b> | <b>Atom</b> | <b>Angle/°</b> |
|-------------|-------------|-------------|----------------|-------------|-------------|-------------|----------------|
| C52         | C53         | C54         | 119.86(19)     | C106        | C107        | C108        | 120.13(19)     |
| C55         | C54         | C53         | 119.69(19)     | C107        | C108        | C109        | 120.08(19)     |
| C54         | C55         | C50         | 120.71(18)     | C108        | C109        | C104        | 120.34(18)     |

**Table S7.** Crystal data and structure refinement for [Ag(L<sup>Ph</sup>)(PPh<sub>3</sub>)<sub>2</sub>] (**10**).

|                                             |                                                                 |
|---------------------------------------------|-----------------------------------------------------------------|
| Identification code                         | HRD108_0m                                                       |
| Empirical formula                           | C <sub>51</sub> H <sub>41</sub> AgO <sub>2</sub> P <sub>2</sub> |
| Formula weight                              | 855.65                                                          |
| Temperature/K                               | 100.00                                                          |
| Crystal system                              | monoclinic                                                      |
| Space group                                 | P2 <sub>1</sub> /n                                              |
| a/Å                                         | 10.9503(3)                                                      |
| b/Å                                         | 22.1429(6)                                                      |
| c/Å                                         | 16.6953(5)                                                      |
| α/°                                         | 90                                                              |
| β/°                                         | 98.0050(10)                                                     |
| γ/°                                         | 90                                                              |
| Volume/Å <sup>3</sup>                       | 4008.7(2)                                                       |
| Z                                           | 4                                                               |
| ρ <sub>calc</sub> /g/cm <sup>3</sup>        | 1.418                                                           |
| μ/mm <sup>-1</sup>                          | 0.624                                                           |
| F(000)                                      | 1760.0                                                          |
| Crystal size/mm <sup>3</sup>                | 0.28 × 0.15 × 0.1                                               |
| Radiation                                   | Mo Kα (λ = 0.71073)                                             |
| 2θ range for data collection/°              | 5.258 to 64.924                                                 |
| Index ranges                                | -15 ≤ h ≤ 16, -30 ≤ k ≤ 31, -25 ≤ l ≤ 25                        |
| Reflections collected                       | 35007                                                           |
| Independent reflections                     | 13384 [R <sub>int</sub> = 0.0173, R <sub>sigma</sub> = 0.0199]  |
| Data/restraints/parameters                  | 13384/0/506                                                     |
| Goodness-of-fit on F <sup>2</sup>           | 1.066                                                           |
| Final R indexes [I ≥ 2σ (I)]                | R <sub>1</sub> = 0.0237, wR <sub>2</sub> = 0.0585               |
| Final R indexes [all data]                  | R <sub>1</sub> = 0.0271, wR <sub>2</sub> = 0.0611               |
| Largest diff. peak/hole / e Å <sup>-3</sup> | 0.50/-0.54                                                      |



**Table S8.** Bond Lengths for [Ag(L<sup>Ph</sup>)(PPh<sub>3</sub>)<sub>2</sub>] (**10**).

| <b>Atom</b> | <b>Atom</b> | <b>Length/Å</b> | <b>Atom</b> | <b>Atom</b> | <b>Length/Å</b> |
|-------------|-------------|-----------------|-------------|-------------|-----------------|
| Ag          | P1          | 2.4290(3)       | C19         | C20         | 1.3898(18)      |
| Ag          | P2          | 2.4188(3)       | C20         | C21         | 1.3890(17)      |
| Ag          | O1          | 2.3259(8)       | C22         | C23         | 1.3975(16)      |
| Ag          | O2          | 2.3610(9)       | C22         | C27         | 1.3949(16)      |
| P1          | C16         | 1.8221(11)      | C23         | C24         | 1.3931(16)      |
| P1          | C22         | 1.8165(11)      | C24         | C25         | 1.388(2)        |
| P1          | C28         | 1.8218(11)      | C25         | C26         | 1.383(2)        |
| P2          | C34         | 1.8243(11)      | C26         | C27         | 1.3922(16)      |
| P2          | C40         | 1.8243(11)      | C28         | C29         | 1.3963(16)      |
| P2          | C46         | 1.8244(11)      | C28         | C33         | 1.3997(15)      |
| O1          | C1          | 1.2641(14)      | C29         | C30         | 1.3935(17)      |
| O2          | C3          | 1.2601(14)      | C30         | C31         | 1.3869(18)      |
| C1          | C2          | 1.4138(15)      | C31         | C32         | 1.3899(18)      |
| C1          | C4          | 1.5055(15)      | C32         | C33         | 1.3883(17)      |
| C2          | C3          | 1.4102(15)      | C34         | C35         | 1.3882(17)      |
| C3          | C10         | 1.5131(15)      | C34         | C39         | 1.3782(17)      |
| C4          | C5          | 1.3966(15)      | C35         | C36         | 1.387(2)        |
| C4          | C9          | 1.4010(16)      | C36         | C37         | 1.372(2)        |
| C5          | C6          | 1.3927(15)      | C37         | C38         | 1.373(2)        |
| C6          | C7          | 1.3904(18)      | C38         | C39         | 1.3966(19)      |
| C7          | C8          | 1.3920(17)      | C40         | C41         | 1.3977(16)      |
| C8          | C9          | 1.3913(16)      | C40         | C45         | 1.3969(16)      |
| C10         | C11         | 1.3953(16)      | C41         | C42         | 1.3928(16)      |
| C10         | C15         | 1.3932(16)      | C42         | C43         | 1.3886(18)      |
| C11         | C12         | 1.3889(17)      | C43         | C44         | 1.3892(18)      |
| C12         | C13         | 1.3870(18)      | C44         | C45         | 1.3931(15)      |
| C13         | C14         | 1.384(2)        | C46         | C47         | 1.3995(16)      |
| C14         | C15         | 1.3913(17)      | C46         | C51         | 1.3978(16)      |
| C16         | C17         | 1.3966(15)      | C47         | C48         | 1.3893(17)      |
| C16         | C21         | 1.3996(15)      | C48         | C49         | 1.3909(19)      |
| C17         | C18         | 1.3934(17)      | C49         | C50         | 1.3882(18)      |
| C18         | C19         | 1.3902(18)      | C50         | C51         | 1.3926(17)      |

**Table S9.** Bond Angles for [Ag(L<sup>Ph</sup>)(PPh<sub>3</sub>)<sub>2</sub>] (**10**).

| Atom | Atom | Atom | Angle/°     | Atom | Atom | Atom | Angle/°    |
|------|------|------|-------------|------|------|------|------------|
| P2   | Ag   | P1   | 129.195(10) | C18  | C17  | C16  | 120.37(11) |
| O1   | Ag   | P1   | 105.84(2)   | C19  | C18  | C17  | 120.29(11) |
| O1   | Ag   | P2   | 119.64(2)   | C20  | C19  | C18  | 119.75(11) |
| O1   | Ag   | O2   | 77.70(3)    | C21  | C20  | C19  | 120.03(11) |
| O2   | Ag   | P1   | 110.94(2)   | C20  | C21  | C16  | 120.78(11) |
| O2   | Ag   | P2   | 100.26(2)   | C23  | C22  | P1   | 123.04(9)  |
| C16  | P1   | Ag   | 112.82(4)   | C27  | C22  | P1   | 117.30(9)  |
| C22  | P1   | Ag   | 115.40(4)   | C27  | C22  | C23  | 119.66(10) |
| C22  | P1   | C16  | 104.24(5)   | C24  | C23  | C22  | 119.88(12) |
| C22  | P1   | C28  | 104.27(5)   | C25  | C24  | C23  | 120.12(12) |
| C28  | P1   | Ag   | 111.90(4)   | C26  | C25  | C24  | 120.10(11) |
| C28  | P1   | C16  | 107.44(5)   | C25  | C26  | C27  | 120.32(12) |
| C34  | P2   | Ag   | 115.84(4)   | C26  | C27  | C22  | 119.92(12) |
| C40  | P2   | Ag   | 111.78(4)   | C29  | C28  | P1   | 124.68(9)  |
| C40  | P2   | C34  | 104.98(5)   | C29  | C28  | C33  | 119.22(10) |
| C40  | P2   | C46  | 105.63(5)   | C33  | C28  | P1   | 116.10(8)  |
| C46  | P2   | Ag   | 114.42(4)   | C30  | C29  | C28  | 120.03(11) |
| C46  | P2   | C34  | 103.14(5)   | C31  | C30  | C29  | 120.19(11) |
| C1   | O1   | Ag   | 124.88(7)   | C30  | C31  | C32  | 120.24(11) |
| C3   | O2   | Ag   | 121.59(7)   | C33  | C32  | C31  | 119.73(11) |
| O1   | C1   | C2   | 127.09(10)  | C32  | C33  | C28  | 120.57(11) |
| O1   | C1   | C4   | 115.70(9)   | C35  | C34  | P2   | 117.92(9)  |
| C2   | C1   | C4   | 117.22(10)  | C39  | C34  | P2   | 123.71(9)  |
| C3   | C2   | C1   | 126.08(10)  | C39  | C34  | C35  | 118.31(11) |
| O2   | C3   | C2   | 125.40(10)  | C36  | C35  | C34  | 121.13(13) |
| O2   | C3   | C10  | 116.04(10)  | C37  | C36  | C35  | 120.19(13) |
| C2   | C3   | C10  | 118.56(10)  | C36  | C37  | C38  | 119.22(13) |
| C5   | C4   | C1   | 118.89(10)  | C37  | C38  | C39  | 120.85(13) |
| C5   | C4   | C9   | 118.79(10)  | C34  | C39  | C38  | 120.25(12) |
| C9   | C4   | C1   | 122.16(10)  | C41  | C40  | P2   | 118.09(8)  |
| C6   | C5   | C4   | 121.07(11)  | C45  | C40  | P2   | 122.90(8)  |
| C7   | C6   | C5   | 119.56(11)  | C45  | C40  | C41  | 119.00(10) |
| C6   | C7   | C8   | 120.02(10)  | C42  | C41  | C40  | 120.46(11) |
| C9   | C8   | C7   | 120.33(11)  | C43  | C42  | C41  | 120.12(11) |
| C8   | C9   | C4   | 120.22(10)  | C42  | C43  | C44  | 119.84(11) |
| C11  | C10  | C3   | 124.17(10)  | C43  | C44  | C45  | 120.21(11) |
| C15  | C10  | C3   | 117.53(10)  | C44  | C45  | C40  | 120.36(11) |
| C15  | C10  | C11  | 118.19(10)  | C47  | C46  | P2   | 123.02(9)  |
| C12  | C11  | C10  | 120.59(11)  | C51  | C46  | P2   | 117.51(8)  |
| C13  | C12  | C11  | 120.55(12)  | C51  | C46  | C47  | 119.44(10) |

**Table S9.** Bond Angles for [Ag(L<sup>Ph</sup>)(PPh<sub>3</sub>)<sub>2</sub>] (**10**).

| <b>Atom</b> | <b>Atom</b> | <b>Atom</b> | <b>Angle/°</b> | <b>Atom</b> | <b>Atom</b> | <b>Atom</b> | <b>Angle/°</b> |
|-------------|-------------|-------------|----------------|-------------|-------------|-------------|----------------|
| C14         | C13         | C12         | 119.47(12)     | C48         | C47         | C46         | 120.35(11)     |
| C13         | C14         | C15         | 119.95(12)     | C47         | C48         | C49         | 119.87(11)     |
| C14         | C15         | C10         | 121.21(12)     | C50         | C49         | C48         | 120.19(11)     |
| C17         | C16         | P1          | 123.40(8)      | C49         | C50         | C51         | 120.21(12)     |
| C17         | C16         | C21         | 118.77(10)     | C50         | C51         | C46         | 119.95(11)     |
| C21         | C16         | P1          | 117.42(8)      |             |             |             |                |
